# Supplementary material for: Theoretical Investigation of Carbon Dioxide Adsorption on Li+-Decorated Nanoflakes
Source: MDPI journal article supplement (doi:10.3390/molecules26247688), 2021-12-20
Supplement: s1 [file s1]

Supplementary Materials

# Theoretical Investigation of Carbon Dioxide Adsorption on Li<sup>+</sup>-Decorated Nanoflakes

Igor K. Petrushenko <sup>1,\*</sup>, Nikolay A. Ivanov <sup>1</sup> and Konstantin B. Petrushenko <sup>2</sup>

<sup>1</sup> Irkutsk National Research Technical University, 83 Lermontov st., 664074 Irkutsk, Russia; ivnik@istu.edu

<sup>2</sup> AE Favorsky Irkutsk Institute of Chemistry, Siberian Branch of the Russian Academy of Sciences, 1 Favorsky st., 664033 Irkutsk, Russia; ko\_petr@irioc.irk.ru

\* Correspondence: igor.petrushenko@istu.edu

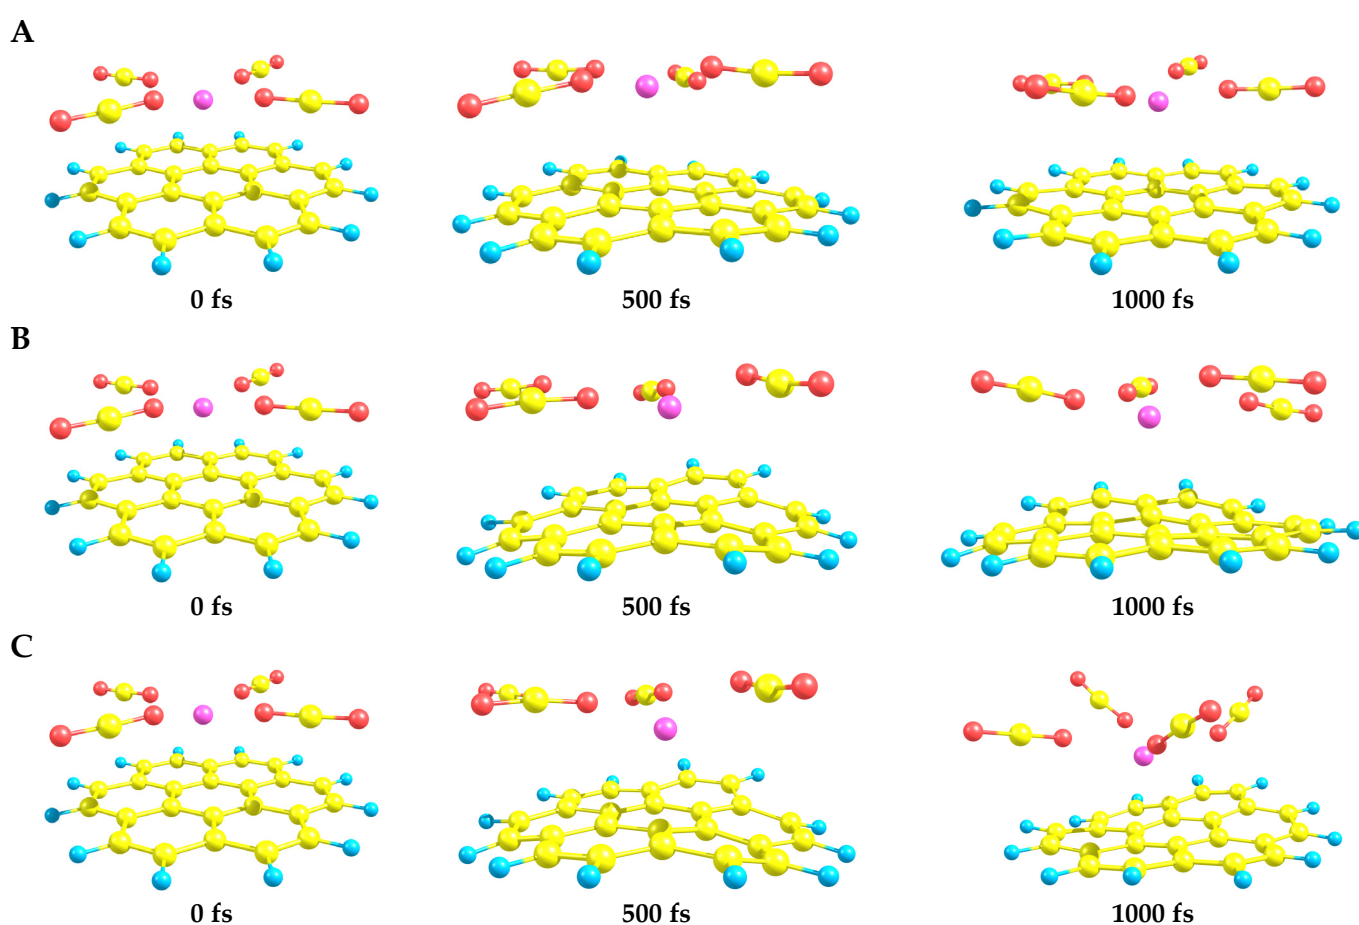

**Figure S1.** AIMD simulations snap shots of four adsorbed CO<sub>2</sub> molecules on Li<sup>+</sup>@coronene complexes at T = 77 K (**A**), 300 K (**B**), 400 K (**C**). Atomic color code: carbon—yellow, oxygen—red, hydrogen—light-blue, lithium cation—magenta.

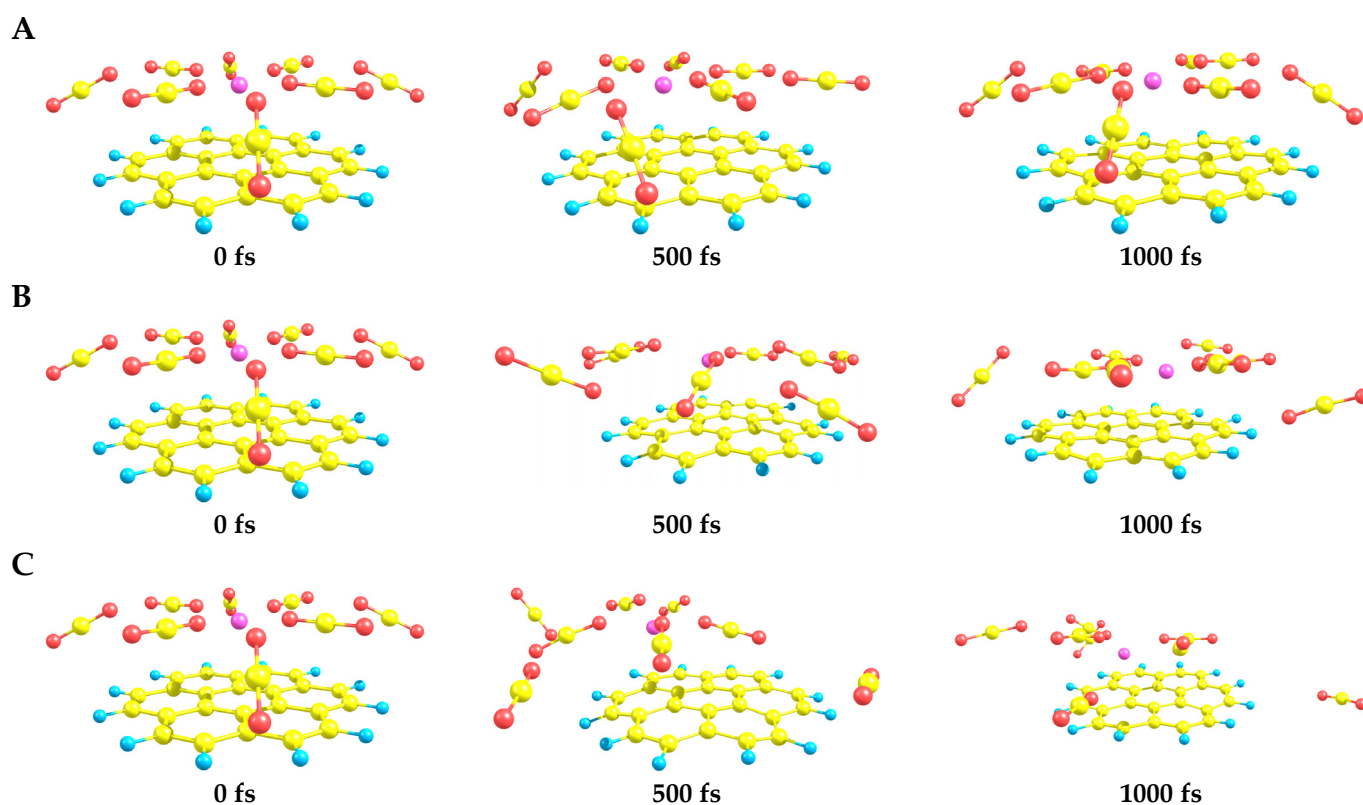

**Figure S2.** AIMD simulations snap shots of eight adsorbed CO<sub>2</sub> molecules on Li<sup>+</sup>@coronene complexes at T = 77 K (**A**), 300 K (**B**), 400 K (**C**). Atomic color code: carbon—yellow, oxygen—red, hydrogen—light-blue, lithium cation—magenta.

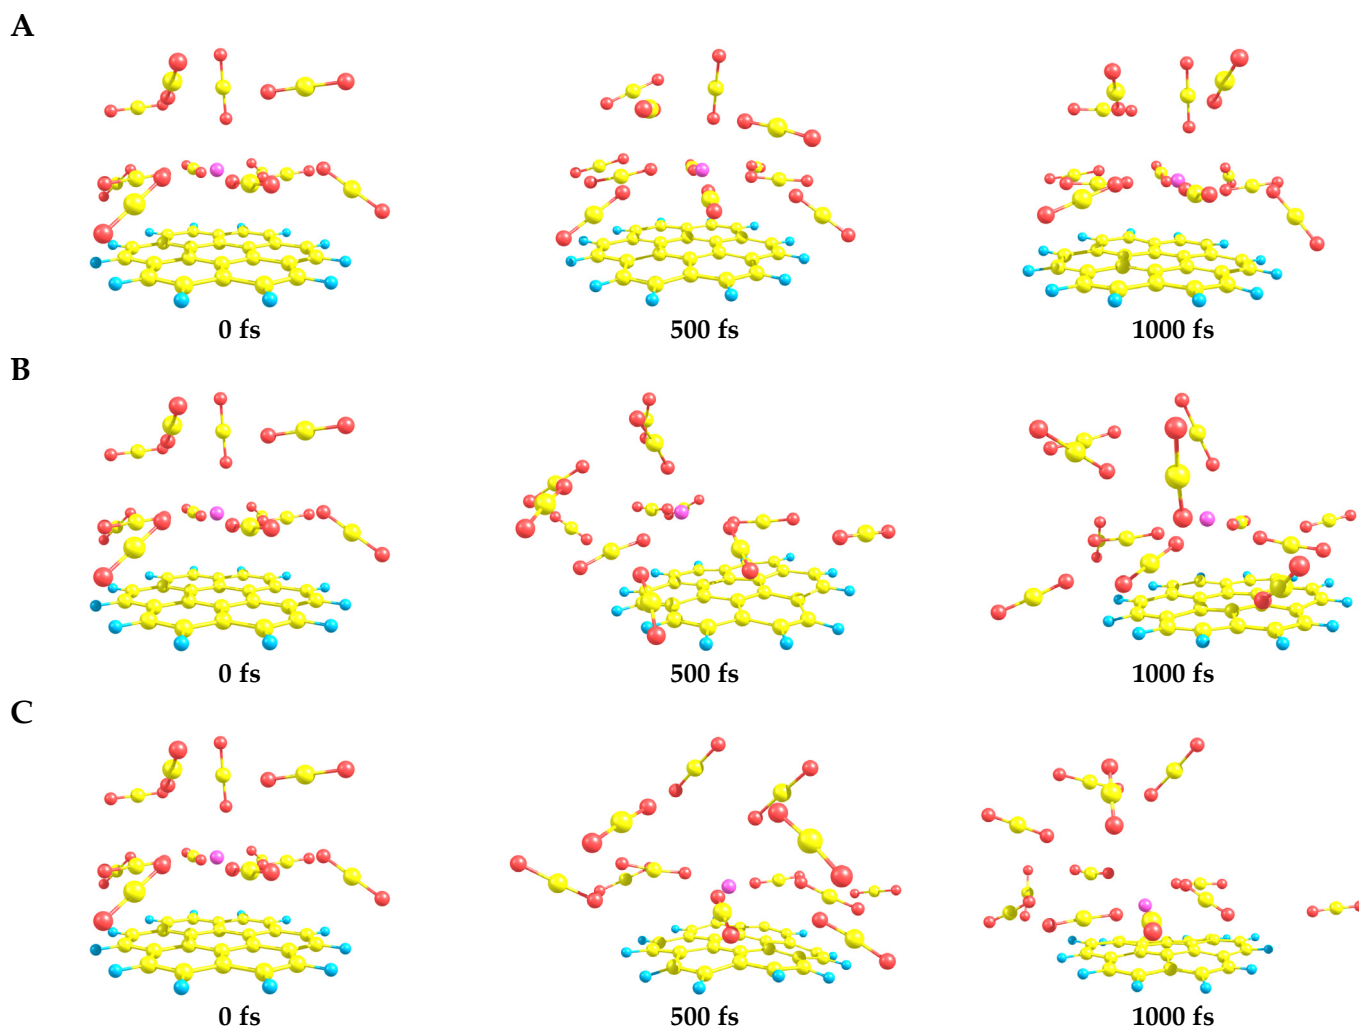

**Figure S3.** AIMD simulations snap shots of twelve adsorbed CO<sub>2</sub> molecules on Li<sup>+</sup>@coronene complexes at T = 77 K (A), 300 K (B), 400 K (C). Atomic color code: carbon—yellow, oxygen—red, hydrogen—light-blue, lithium cation—magenta.

### Independent Gradient Model (IGM)

This straightforward approach “provides chemists with a visual understanding of interactions present in chemical systems”. The new descriptors, which are defined in the framework of this method, allow obtaining a measure of electron sharing ( $\delta g$ ), and separately describe interactions inside each fragment ( $\delta g^{\text{intra}}$ ) or between fragments ( $\delta g^{\text{inter}}$ ).

$$\delta g = |\nabla \rho^{\text{IGM}}| - |\nabla \rho|. \quad (\text{S1})$$

$$\delta g^{\text{inter}} = |\nabla \rho^{\text{IGM, inter}}| - |\nabla \rho|. \quad (\text{S2})$$

$$\delta g^{\text{intra}} = |\nabla \rho^{\text{IGM}}| - |\nabla \rho^{\text{IGM, inter}}|. \quad (\text{S3})$$

$$\delta g = \delta g^{\text{inter}} + \delta g^{\text{intra}}. \quad (\text{S4})$$

where  $\delta g^{\text{intra}}$  and  $\delta g^{\text{inter}}$  are the intramolecular and intermolecular contributions;  $\nabla \rho$  is the electron density gradient,  $\nabla \rho^{\text{IGM}}$  is the gradient vector of density in independent gradient model;  $\nabla \rho^{\text{IGM, inter}}$  is the gradient vector, where the interaction between molecules canceled while intramolecular part has been divided into two additions, which corresponds to intramolecular interaction in separate molecules.

### Symmetry-Adapted Perturbation Theory (SAPT)

Symmetry-adapted perturbation theory (SAPT) is a method for direct calculations of the non-covalent interaction between two molecules. In other words, the interaction energy is determined without computing the total energy of the monomers or dimer. Thus, the result obtained is free from the basis set superposition error (BSSE). In addition, SAPT provides a decomposition of the interaction energy into meaningful components: *i.e.*, electrostatic, exchange, induction (polarization) and dispersion terms. In SAPT, the Hamiltonian of the dimer is partitioned into contributions from each monomer and the interaction.

$$H = F_A + W_A + F_B + W_B + V \quad (S5)$$

the Hamiltonian (H) is written as a sum of the usual monomer Fock operators (F), the fluctuation potential of each monomer (W), and the interaction potential (V). Fock operators are treated as the zeroth-order Hamiltonian and the interaction energy is evaluated through a perturbative expansion of V,  $W_A$  and  $W_B$ . Through first-order in V, electrostatic and exchange interactions are included; induction and dispersion first appear at second-order in V.

Several truncations of the closed-shell SAPT expansion are available in PSI4. The simplest truncation of SAPT is denoted SAPT0 and defined in the following equation:

$$E_{SAPT0} = E_{elst}^{(10)} + E_{exch}^{(10)} + E_{ind,resp}^{(20)} + E_{exch-ind,resp}^{(20)} + E_{disp}^{(20)} + E_{exch-disp}^{(20)} + \delta_{HF}^{(2)} \quad (S6)$$

In this notation,  $E^{(vw)}$  defines the order in V and in  $W_A + W_B$ ; the subscript (resp) indicates that orbital relaxation effects are included.

The  $\delta_{HF}^{(2)}$  term takes into account the higher-order induction effects, and it is included in the definition of SAPT terms.

Normally, the adsorption energy terms are calculated as following:

$$E_{ad} = E_{el} + E_{ex} + E_{ind} + E_{disp}, \quad (S7)$$

$$\text{Where } E_{el} = E_{elst}^{(10)}, E_{ex} = E_{exch}^{(10)}$$

$$E_{ind} = E_{ind,resp}^{(20)} + E_{exch-ind,resp}^{(20)} + \delta_{HF}^{(2)}, \quad (S8)$$

$$E_{disp} = E_{disp}^{(20)} + E_{exch-disp}^{(20)} \quad (S9)$$

For the SAPT2 method, we can write down the following equation:

$$E_{SAPT2} = E_{SAPT0} + E_{elst,resp}^{(12)} + E_{exch}^{(11)} + E_{exch}^{(12)} + E_{ind}^{t(22)} + E_{exch-ind}^{t(22)}, \quad (S10)$$

where some second order corrections in energy have been added with amendments to the energy terms mentioned above.

## Cartesian Coordinates of Studied Structures

| <u>Li<sup>+</sup>@coronene</u>                 |              |              |              |
|------------------------------------------------|--------------|--------------|--------------|
| C                                              | -2.615410255 | 0.146156238  | -2.429314242 |
| C                                              | -2.618361312 | 1.104650754  | -1.365180291 |
| C                                              | -2.633859033 | 0.625402817  | -0.010247911 |
| C                                              | -2.633703683 | -0.794269759 | 0.254447452  |
| C                                              | -2.618074658 | -1.728389816 | -0.837819959 |
| C                                              | -2.614852532 | -1.216827611 | -2.175682569 |
| C                                              | -2.630743237 | 1.564271615  | 1.087676548  |
| C                                              | -2.634758769 | -1.274578413 | 1.615887922  |
| C                                              | -2.635961013 | -0.335719513 | 2.713827354  |
| C                                              | -2.631770840 | 1.083970868  | 2.449126993  |
| C                                              | -2.622504104 | -0.814998151 | 4.068796939  |
| C                                              | -2.621539691 | -2.229279794 | 4.294875563  |
| C                                              | -2.620529598 | -3.130488784 | 3.241753991  |
| C                                              | -2.620766312 | -2.687964470 | 1.879556298  |
| C                                              | -2.616302559 | -3.591055129 | 0.767696782  |
| C                                              | -2.614764030 | -3.129492832 | -0.539665109 |
| H                                              | -2.612032261 | -3.844453829 | -1.374619734 |
| H                                              | -2.614871502 | -4.672010810 | 0.968686158  |
| H                                              | -2.613503863 | 0.512804387  | -3.465514989 |
| H                                              | -2.612535434 | -1.930738196 | -3.011469453 |
| H                                              | -2.621672053 | -2.595363043 | 5.331214956  |
| H                                              | -2.620020753 | -4.211220329 | 3.443333475  |
| C                                              | -2.613255344 | 2.518923255  | -1.591254250 |
| C                                              | -2.610233513 | 3.420143301  | -0.538145505 |
| C                                              | -2.612534937 | 2.977616217  | 0.824046306  |
| H                                              | -2.611743284 | 2.885005581  | -2.627593704 |
| H                                              | -2.606403248 | 4.500865570  | -0.739737478 |
| C                                              | -2.606038346 | 3.880677695  | 1.935923252  |
| C                                              | -2.606534211 | 3.419125100  | 3.243290049  |
| C                                              | -2.614011824 | 2.018037155  | 3.541436390  |
| H                                              | -2.601296920 | 4.961625986  | 1.734939788  |
| H                                              | -2.602155441 | 4.134077231  | 4.078244302  |
| C                                              | -2.617421656 | 0.143485616  | 5.132931926  |
| H                                              | -2.617099659 | -0.223162591 | 6.169134000  |
| C                                              | -2.612890249 | 1.506462770  | 4.879299613  |
| H                                              | -2.608948997 | 2.220361692  | 5.715090420  |
| Li                                             | -0.847040741 | 0.142593835  | 1.354549615  |
| <u>1CO<sub>2</sub>@Li<sup>+</sup>@coronene</u> |              |              |              |
| C                                              | -2.193817120 | -1.201492351 | -2.807036778 |
| C                                              | -2.481997591 | -0.326600788 | -1.708474189 |
| C                                              | -2.484721537 | -0.868120650 | -0.376318039 |
| C                                              | -2.177558543 | -2.264660720 | -0.169190944 |
| C                                              | -1.877296506 | -3.113558570 | -1.293811329 |
| C                                              | -1.905518786 | -2.542929120 | -2.608899524 |
| C                                              | -2.762037212 | -0.014896508 | 0.752832159  |
| C                                              | -2.122567069 | -2.795412410 | 1.174428022  |

|                                                |              |              |              |
|------------------------------------------------|--------------|--------------|--------------|
| C                                              | -2.402307073 | -1.938705542 | 2.300360994  |
| C                                              | -2.722626904 | -0.550999635 | 2.087870714  |
| C                                              | -2.348408628 | -2.469801798 | 3.633162145  |
| C                                              | -2.018673974 | -3.853687600 | 3.808836925  |
| C                                              | -1.745294422 | -4.676300831 | 2.727227253  |
| C                                              | -1.785617125 | -4.178031676 | 1.384650064  |
| C                                              | -1.509037532 | -4.999031085 | 0.242019052  |
| C                                              | -1.552427794 | -4.488216056 | -1.046207449 |
| H                                              | -1.333490738 | -5.139365651 | -1.904268965 |
| H                                              | -1.256414715 | -6.056331748 | 0.405333658  |
| H                                              | -2.202926510 | -0.785994529 | -3.824662323 |
| H                                              | -1.687412439 | -3.192724204 | -3.468112856 |
| H                                              | -1.984298571 | -4.260089128 | 4.829719905  |
| H                                              | -1.493571449 | -5.733863876 | 2.889804863  |
| C                                              | -2.763288987 | 1.067925167  | -1.881114704 |
| C                                              | -3.030884880 | 1.888466250  | -0.796642251 |
| C                                              | -3.035745351 | 1.379465252  | 0.544380124  |
| H                                              | -2.768302129 | 1.481900632  | -2.899522878 |
| H                                              | -3.249380116 | 2.954148706  | -0.955374178 |
| C                                              | -3.294611527 | 2.207230255  | 1.686368062  |
| C                                              | -3.271801830 | 1.687451341  | 2.970963214  |
| C                                              | -2.980638495 | 0.304236483  | 3.212237472  |
| H                                              | -3.516709849 | 3.271590499  | 1.525292695  |
| H                                              | -3.477693966 | 2.339237983  | 3.831854746  |
| C                                              | -2.628734181 | -1.594644742 | 4.733108160  |
| H                                              | -2.598740485 | -2.004630907 | 5.752447790  |
| C                                              | -2.932451759 | -0.257760519 | 4.529973400  |
| H                                              | -3.143156615 | 0.395434995  | 5.388515588  |
| Li                                             | -0.254303965 | -1.385313859 | 0.456845040  |
| O                                              | 0.473028598  | 0.350633212  | 0.675310653  |
| C                                              | 0.312102573  | 1.527841271  | 0.726400841  |
| O                                              | 0.180673181  | 2.680841782  | 0.778433031  |
| <b>2CO<sub>2</sub>@Li<sup>+</sup>@coronene</b> |              |              |              |
| C                                              | -1.972051583 | -2.167174677 | -2.856727906 |
| C                                              | -2.080434902 | -1.177158526 | -1.826494693 |
| C                                              | -2.197224572 | -1.615715050 | -0.458691499 |
| C                                              | -2.216202738 | -3.023487385 | -0.148951441 |
| C                                              | -2.102770362 | -3.988413150 | -1.206521254 |
| C                                              | -1.980200764 | -3.520799328 | -2.556394516 |
| C                                              | -2.295271951 | -0.642088162 | 0.606567776  |
| C                                              | -2.346596460 | -3.457766166 | 1.215969772  |
| C                                              | -2.445931626 | -2.489644241 | 2.275253412  |
| C                                              | -2.414044914 | -1.083361865 | 1.973959224  |
| C                                              | -2.564796607 | -2.926328438 | 3.638116075  |
| C                                              | -2.596706453 | -4.333247598 | 3.909829521  |
| C                                              | -2.500442369 | -5.265826782 | 2.889890646  |
| C                                              | -2.365698850 | -4.860981720 | 1.521443035  |
| C                                              | -2.249814979 | -5.801154398 | 0.444954100  |

|                                                |              |              |              |
|------------------------------------------------|--------------|--------------|--------------|
| C                                              | -2.121632962 | -5.382086253 | -0.869895278 |
| H                                              | -2.037167228 | -6.121516498 | -1.678967055 |
| H                                              | -2.268094056 | -6.875016453 | 0.680761955  |
| H                                              | -1.888443684 | -1.833669011 | -3.901051776 |
| H                                              | -1.898117261 | -4.262105204 | -3.364094597 |
| H                                              | -2.696775409 | -4.665300659 | 4.952730967  |
| H                                              | -2.523831268 | -6.340236106 | 3.121209261  |
| C                                              | -2.082142562 | 0.232577619  | -2.097219428 |
| C                                              | -2.172520406 | 1.167186045  | -1.074932037 |
| C                                              | -2.272530792 | 0.766181390  | 0.299905773  |
| H                                              | -2.015366253 | 0.566932339  | -3.142514774 |
| H                                              | -2.177298438 | 2.241071874  | -1.311499715 |
| C                                              | -2.358722864 | 1.703978706  | 1.380219074  |
| C                                              | -2.465267125 | 1.277684877  | 2.695287807  |
| C                                              | -2.496893041 | -0.115862486 | 3.031667886  |
| H                                              | -2.348550604 | 2.778666186  | 1.147485730  |
| H                                              | -2.534978086 | 2.016001846  | 3.506967323  |
| C                                              | -2.647637286 | -1.937308729 | 4.672884361  |
| H                                              | -2.744189739 | -2.274887304 | 5.714666066  |
| C                                              | -2.613627081 | -0.582672810 | 4.382277218  |
| H                                              | -2.682232591 | 0.157299310  | 5.192268157  |
| Li                                             | -0.011130140 | -1.119618157 | 0.264856936  |
| C                                              | 1.012494030  | 0.885804864  | -1.663030074 |
| O                                              | 1.039206050  | 1.702592588  | -2.491195990 |
| O                                              | 1.028361481  | 0.053844240  | -0.816171794 |
| O                                              | 0.769521547  | -2.348465134 | 1.484426392  |
| C                                              | 0.712309337  | -3.224208833 | 2.283872929  |
| O                                              | 0.686053290  | -4.081246310 | 3.069445773  |
| <b>3CO<sub>2</sub>@Li<sup>+</sup>@coronene</b> |              |              |              |
| C                                              | -2.019623783 | -2.217608405 | -2.876765661 |
| C                                              | -2.111122702 | -1.231271776 | -1.840798811 |
| C                                              | -2.224574278 | -1.671146613 | -0.477320872 |
| C                                              | -2.263278073 | -3.075466976 | -0.172375793 |
| C                                              | -2.175768343 | -4.040538602 | -1.232476322 |
| C                                              | -2.047877810 | -3.571956640 | -2.581608116 |
| C                                              | -2.301040257 | -0.700949964 | 0.587799012  |
| C                                              | -2.387850207 | -3.512989072 | 1.191920518  |
| C                                              | -2.460331401 | -2.547962131 | 2.255179593  |
| C                                              | -2.427705541 | -1.142261259 | 1.955766102  |
| C                                              | -2.570270781 | -2.986113922 | 3.618404788  |
| C                                              | -2.608973644 | -4.393257573 | 3.888109300  |
| C                                              | -2.545045342 | -5.323450310 | 2.863163225  |
| C                                              | -2.432875751 | -4.916254611 | 1.493378787  |
| C                                              | -2.355294550 | -5.855703777 | 0.413518184  |
| C                                              | -2.226994613 | -5.434333292 | -0.900309863 |
| H                                              | -2.165820545 | -6.172555772 | -1.712662597 |
| H                                              | -2.394010405 | -6.929396682 | 0.646758761  |
| H                                              | -1.933704339 | -1.880476835 | -3.919796750 |
| H                                              | -1.982574747 | -4.312387362 | -3.391761123 |

|                                                |              |              |              |
|------------------------------------------------|--------------|--------------|--------------|
| H                                              | −2.699019403 | −4.727272927 | 4.931477823  |
| H                                              | −2.583222615 | −6.398262256 | 3.091124692  |
| C                                              | −2.098696341 | 0.178123782  | −2.111346628 |
| C                                              | −2.166984842 | 1.112378192  | −1.087987170 |
| C                                              | −2.268690224 | 0.708366509  | 0.284230677  |
| H                                              | −2.035210565 | 0.512173501  | −3.156582269 |
| H                                              | −2.163387487 | 2.186949203  | −1.321589140 |
| C                                              | −2.363609620 | 1.645460542  | 1.365400433  |
| C                                              | −2.492626725 | 1.220370285  | 2.679633564  |
| C                                              | −2.518169485 | −0.175295797 | 3.015754160  |
| H                                              | −2.354168587 | 2.720276589  | 1.132476672  |
| H                                              | −2.581568154 | 1.958374624  | 3.489826711  |
| C                                              | −2.644973666 | −1.999292799 | 4.655419867  |
| H                                              | −2.732913103 | −2.338307399 | 5.697584842  |
| C                                              | −2.623437081 | −0.643290965 | 4.366940143  |
| H                                              | −2.693100890 | 0.095219878  | 5.178235770  |
| Li                                             | 0.214141774  | −0.838351296 | 0.874483392  |
| C                                              | 0.952065510  | 0.188350730  | −1.904365891 |
| O                                              | 1.014922181  | 0.541099304  | −3.012618692 |
| O                                              | 0.940079376  | −0.174201519 | −0.775960768 |
| O                                              | 0.784393566  | −2.663822618 | 1.063734499  |
| C                                              | 0.781516923  | −3.849387448 | 1.052394580  |
| O                                              | 0.813852477  | −5.012694210 | 1.040065600  |
| O                                              | 0.699119516  | 0.193955787  | 2.420365888  |
| C                                              | 0.494466736  | 0.744484055  | 3.450858900  |
| O                                              | 0.329736732  | 1.295023669  | 4.463422923  |
| <b>4CO<sub>2</sub>@Li<sup>+</sup>@coronene</b> |              |              |              |
| C                                              | −2.122342022 | −1.238055754 | −2.757363194 |
| C                                              | −2.388516976 | −0.364855377 | −1.652413283 |
| C                                              | −2.413823363 | −0.917552714 | −0.325604857 |
| C                                              | −2.155645083 | −2.320175690 | −0.124480275 |
| C                                              | −1.871530029 | −3.166251390 | −1.251172098 |
| C                                              | −1.878015652 | −2.590087953 | −2.564649277 |
| C                                              | −2.687339960 | −0.069119552 | 0.804640874  |
| C                                              | −2.171759415 | −2.870574282 | 1.204610719  |
| C                                              | −2.445817975 | −2.021541238 | 2.331371923  |
| C                                              | −2.704127967 | −0.621700621 | 2.131269669  |
| C                                              | −2.439929497 | −2.567627046 | 3.659373185  |
| C                                              | −2.163299063 | −3.963860773 | 3.828875655  |
| C                                              | −1.901967781 | −4.783785543 | 2.742570393  |
| C                                              | −1.896366892 | −4.265838627 | 1.405432361  |
| C                                              | −1.604010645 | −5.083091091 | 0.263236477  |
| C                                              | −1.591184388 | −4.552663099 | −1.018057643 |
| H                                              | −1.373148469 | −5.198615959 | −1.880792647 |
| H                                              | −1.389167564 | −6.149763000 | 0.420368971  |
| H                                              | −2.127116630 | −0.817410053 | −3.773209644 |
| H                                              | −1.682935237 | −3.243236620 | −3.426734780 |
| H                                              | −2.166480358 | −4.381824276 | 4.845822812  |



|                                                |              |              |              |
|------------------------------------------------|--------------|--------------|--------------|
| H                                              | −1.690982913 | −5.851582147 | 2.896631832  |
| C                                              | −2.643900076 | 1.035383144  | −1.819180352 |
| C                                              | −2.909709583 | 1.852922791  | −0.731163948 |
| C                                              | −2.931478338 | 1.332481024  | 0.605610014  |
| H                                              | −2.639212725 | 1.454625941  | −2.835692739 |
| H                                              | −3.111264846 | 2.922936891  | −0.882877937 |
| C                                              | −3.178065997 | 2.159102242  | 1.750799667  |
| C                                              | −3.188597687 | 1.627224925  | 3.030693894  |
| C                                              | −2.955968449 | 0.230807584  | 3.259071957  |
| H                                              | −3.365993552 | 3.231072046  | 1.595501730  |
| H                                              | −3.385911275 | 2.276518957  | 3.895646956  |
| C                                              | −2.708308141 | −1.695100497 | 4.764510465  |
| H                                              | −2.713383227 | −2.117503259 | 5.779359340  |
| C                                              | −2.959066716 | −0.345972319 | 4.571656406  |
| H                                              | −3.161484382 | 0.306368554  | 5.432687295  |
| Li                                             | 0.366763189  | −0.919021260 | 0.612313674  |
| C                                              | 1.120203104  | −2.072751193 | −2.197031953 |
| O                                              | 1.284969718  | −2.739889731 | −3.139685555 |
| O                                              | 0.999015157  | −1.387537867 | −1.239674632 |
| O                                              | 1.037326747  | −2.779945654 | 1.215001582  |
| C                                              | 1.176757197  | −3.900059106 | 1.570054850  |
| O                                              | 1.352300364  | −4.998125432 | 1.921915872  |
| O                                              | 0.361927783  | 1.029578075  | 0.091353190  |
| C                                              | 0.094319400  | 2.180225938  | 0.172841509  |
| O                                              | −0.133819517 | 3.320801352  | 0.255881870  |
| O                                              | 0.436356185  | −0.339858083 | 2.567295185  |
| C                                              | 0.340504071  | −0.060305107 | 3.713765164  |
| O                                              | 0.267227523  | 0.223402223  | 4.841703187  |
| <b>5CO<sub>2</sub>@Li<sup>+</sup>@coronene</b> |              |              |              |
| C                                              | −2.049649699 | −2.131256989 | −2.775560279 |
| C                                              | −2.157430089 | −1.117836529 | −1.767951026 |
| C                                              | −2.250866207 | −1.520269437 | −0.391677202 |
| C                                              | −2.222138439 | −2.914767538 | −0.044255825 |
| C                                              | −2.100886530 | −3.907208396 | −1.074928610 |
| C                                              | −2.031867235 | −3.476728250 | −2.441777590 |
| C                                              | −2.381827424 | −0.523975336 | 0.641188216  |
| C                                              | −2.318634211 | −3.315131920 | 1.333126092  |
| C                                              | −2.469094224 | −2.324014287 | 2.363631403  |
| C                                              | −2.506234463 | −0.928276119 | 2.019843558  |
| C                                              | −2.591313993 | −2.726330365 | 3.736303442  |
| C                                              | −2.518552349 | −4.122209184 | 4.054355489  |
| C                                              | −2.355345708 | −5.076729256 | 3.062916136  |
| C                                              | −2.265609405 | −4.707652938 | 1.680282547  |
| C                                              | −2.124067592 | −5.674425046 | 0.631231276  |
| C                                              | −2.049947563 | −5.289944806 | −0.698358825 |
| H                                              | −1.948131276 | −6.048567574 | −1.487261681 |
| H                                              | −2.079053549 | −6.739520214 | 0.900038412  |
| H                                              | −1.990728754 | −1.822381604 | −3.829009593 |

|                                                |              |              |              |
|------------------------------------------------|--------------|--------------|--------------|
| H                                              | −1.959946199 | −4.237500516 | −3.231519356 |
| H                                              | −2.599073230 | −4.427425840 | 5.107009624  |
| H                                              | −2.305636021 | −6.142645563 | 3.327340301  |
| C                                              | −2.176953709 | 0.283122756  | −2.078762324 |
| C                                              | −2.284623678 | 1.242936005  | −1.083875881 |
| C                                              | −2.399852859 | 0.874202722  | 0.296930519  |
| H                                              | −2.109381411 | 0.588503779  | −3.132725848 |
| H                                              | −2.305617655 | 2.310052949  | −1.347532378 |
| C                                              | −2.556771552 | 1.838986273  | 1.346048658  |
| C                                              | −2.699530748 | 1.448786587  | 2.669638507  |
| C                                              | −2.672893333 | 0.063962184  | 3.046828833  |
| H                                              | −2.584045418 | 2.905510263  | 1.079719950  |
| H                                              | −2.840519882 | 2.205035626  | 3.455223937  |
| C                                              | −2.778335386 | −1.715558876 | 4.736977665  |
| H                                              | −2.895050068 | −2.028295111 | 5.784022890  |
| C                                              | −2.811343529 | −0.369771297 | 4.406385673  |
| H                                              | −2.955815300 | 0.387742920  | 5.189789444  |
| Li                                             | 0.305751902  | −0.672885525 | 1.132803175  |
| C                                              | 0.909584650  | −0.327791501 | −1.813019088 |
| O                                              | 0.985418239  | −0.444277205 | −2.969916594 |
| O                                              | 0.865970326  | −0.188360753 | −0.638442548 |
| O                                              | 0.798858295  | −2.480057919 | 1.506658859  |
| C                                              | 0.901728101  | −3.652351259 | 1.395092442  |
| O                                              | 1.024686299  | −4.807638868 | 1.304628684  |
| O                                              | 0.569346689  | 0.720860480  | 2.405207676  |
| C                                              | 0.315818598  | 1.159645077  | 3.476974502  |
| O                                              | 0.098781346  | 1.613931530  | 4.526898055  |
| O                                              | 1.187321918  | −3.175943147 | −1.378232595 |
| C                                              | 1.005418249  | −4.096656749 | −2.097435855 |
| O                                              | 0.835875410  | −5.014314371 | −2.803363206 |
| O                                              | −0.073707993 | −2.822963488 | 6.179203575  |
| C                                              | 0.244106477  | −2.188171234 | 5.247419093  |
| O                                              | 0.577955550  | −1.556601154 | 4.306943160  |
| <b>6CO<sub>2</sub>@Li<sup>+</sup>@coronene</b> |              |              |              |
| C                                              | −2.029363724 | −2.017055358 | −2.768778700 |
| C                                              | −2.159174590 | −1.015728336 | −1.751354218 |
| C                                              | −2.245239578 | −1.431686811 | −0.378380858 |
| C                                              | −2.196702756 | −2.828537981 | −0.046085710 |
| C                                              | −2.054954066 | −3.808591447 | −1.085885301 |
| C                                              | −1.979643027 | −3.364345154 | −2.447272262 |
| C                                              | −2.393539128 | −0.449461317 | 0.663817980  |
| C                                              | −2.299164962 | −3.245088439 | 1.325401862  |
| C                                              | −2.463074615 | −2.266822936 | 2.364924569  |
| C                                              | −2.511439547 | −0.869481088 | 2.036234245  |
| C                                              | −2.587853811 | −2.686945520 | 3.732407688  |
| C                                              | −2.524430300 | −4.087130251 | 4.033237954  |
| C                                              | −2.351974244 | −5.028726959 | 3.031508677  |
| C                                              | −2.243410971 | −4.641168024 | 1.656594082  |

|                                                |              |              |              |
|------------------------------------------------|--------------|--------------|--------------|
| C                                              | −2.080597957 | −5.594559065 | 0.599849760  |
| C                                              | −1.995109902 | −5.194961134 | −0.724581016 |
| H                                              | −1.878082948 | −5.943648133 | −1.520447918 |
| H                                              | −2.033655234 | −6.662607709 | 0.856764304  |
| H                                              | −1.972094220 | −1.697647374 | −3.818919195 |
| H                                              | −1.883526520 | −4.116340326 | −3.243118703 |
| H                                              | −2.617158529 | −4.405836578 | 5.080645345  |
| H                                              | −2.306672180 | −6.098138318 | 3.282258644  |
| C                                              | −2.212521325 | 0.386075968  | −2.050720725 |
| C                                              | −2.349097826 | 1.334455123  | −1.048393501 |
| C                                              | −2.448039895 | 0.951645281  | 0.332000063  |
| H                                              | −2.156632046 | 0.701667984  | −3.102761740 |
| H                                              | −2.413647982 | 2.401232743  | −1.307475174 |
| C                                              | −2.624195220 | 1.903081696  | 1.393037100  |
| C                                              | −2.745333659 | 1.495159442  | 2.713032002  |
| C                                              | −2.693088086 | 0.107558342  | 3.074241439  |
| H                                              | −2.690478032 | 2.971035854  | 1.139836681  |
| H                                              | −2.899781484 | 2.240774939  | 3.506754686  |
| C                                              | −2.771948469 | −1.689871358 | 4.745996605  |
| H                                              | −2.877236650 | −2.015289608 | 5.790447842  |
| C                                              | −2.822712265 | −0.341504790 | 4.429448871  |
| H                                              | −2.969972423 | 0.405192198  | 5.222459131  |
| Li                                             | 0.442071569  | 0.124450350  | 0.801602823  |
| C                                              | 0.983204469  | −0.645757744 | −2.190573361 |
| O                                              | 1.018110290  | −0.997599694 | −3.302390830 |
| O                                              | 0.970123502  | −0.259295191 | −1.074165712 |
| O                                              | 0.708756615  | −1.753013164 | 1.310609509  |
| C                                              | 0.825323910  | −2.906579462 | 1.535553250  |
| O                                              | 0.953546617  | −4.043180841 | 1.763434141  |
| O                                              | 0.528641061  | 0.699159171  | 2.719990201  |
| C                                              | 0.342345376  | 0.746613393  | 3.886755615  |
| O                                              | 0.173027721  | 0.825723122  | 5.038141685  |
| O                                              | 1.279895830  | −3.309879557 | −1.242714489 |
| C                                              | 1.063986986  | −4.275593893 | −1.888046096 |
| O                                              | 0.855749652  | −5.232745491 | −2.529498796 |
| O                                              | −0.107593008 | −3.171367175 | 6.202931288  |
| C                                              | 0.279462567  | −2.639735621 | 5.234059656  |
| O                                              | 0.676678612  | −2.102015525 | 4.260062751  |
| O                                              | 0.676179173  | 2.164881876  | 0.320030316  |
| C                                              | 0.130757765  | 3.189111180  | 0.094492557  |
| O                                              | −0.402980531 | 4.202971407  | −0.131875150 |
| <b>7CO<sub>2</sub>@Li<sup>+</sup>@coronene</b> |              |              |              |
| C                                              | −2.084120421 | −1.243998811 | −2.713531866 |
| C                                              | −2.330023903 | −0.380159134 | −1.596736866 |
| C                                              | −2.359759152 | −0.949505604 | −0.276573274 |
| C                                              | −2.134985411 | −2.359759265 | −0.095474712 |
| C                                              | −1.881556966 | −3.197617256 | −1.234360404 |
| C                                              | −1.873278405 | −2.604058529 | −2.539225611 |

|    |              |              |              |
|----|--------------|--------------|--------------|
| C  | -2.624733467 | -0.112224207 | 0.863915070  |
| C  | -2.174305076 | -2.929980725 | 1.224004480  |
| C  | -2.444572768 | -2.093689353 | 2.360744250  |
| C  | -2.667864162 | -0.685766204 | 2.181467748  |
| C  | -2.495774102 | -2.665686604 | 3.676552161  |
| C  | -2.270794974 | -4.074390351 | 3.824809882  |
| C  | -1.995635146 | -4.878099581 | 2.730092853  |
| C  | -1.943076960 | -4.335861175 | 1.404307521  |
| C  | -1.673019782 | -5.144448581 | 0.251096506  |
| C  | -1.650046817 | -4.595761342 | -1.022243461 |
| H  | -1.467686762 | -5.239005360 | -1.894899743 |
| H  | -1.492485158 | -6.220174203 | 0.389685756  |
| H  | -2.079446187 | -0.810133390 | -3.723848250 |
| H  | -1.696246343 | -3.249081001 | -3.411420773 |
| H  | -2.321499347 | -4.513330227 | 4.831011431  |
| H  | -1.820219719 | -5.954770646 | 2.867135475  |
| C  | -2.571022159 | 1.024485047  | -1.745496065 |
| C  | -2.831572768 | 1.830499956  | -0.647125565 |
| C  | -2.858792894 | 1.293124871  | 0.682140096  |
| H  | -2.563747684 | 1.457385650  | -2.756331438 |
| H  | -3.027461909 | 2.903073469  | -0.787035947 |
| C  | -3.115794114 | 2.103151569  | 1.836146106  |
| C  | -3.148149873 | 1.552100844  | 3.108195403  |
| C  | -2.933666155 | 0.150170987  | 3.318479065  |
| H  | -3.301185706 | 3.178017513  | 1.697836568  |
| H  | -3.352870403 | 2.191743874  | 3.978430000  |
| C  | -2.768475072 | -1.807843904 | 4.792345539  |
| H  | -2.811099400 | -2.248641988 | 5.797971660  |
| C  | -2.977611682 | -0.449027532 | 4.619584118  |
| H  | -3.184639319 | 0.191865066  | 5.488013320  |
| Li | 0.459361036  | -0.790247549 | 0.568360210  |
| C  | 1.129814409  | -1.988482323 | -2.271280124 |
| O  | 1.291968910  | -2.571563595 | -3.269050205 |
| O  | 0.993884741  | -1.374693211 | -1.270652715 |
| O  | 1.017961568  | -2.577284362 | 1.278491255  |
| C  | 1.156389459  | -3.667035722 | 1.709143518  |
| O  | 1.307040763  | -4.743309731 | 2.135281829  |
| O  | 0.121415953  | 2.857654242  | 2.689394045  |
| C  | -0.611368053 | 3.680046079  | 3.115903489  |
| O  | -1.338573347 | 4.495980690  | 3.537403939  |
| O  | 1.741542817  | -4.517029940 | -0.938172962 |
| C  | 1.380626054  | -5.614224985 | -1.184961571 |
| O  | 1.018963899  | -6.701864815 | -1.427381912 |
| O  | -0.091080204 | -3.374365469 | 6.313322904  |
| C  | 0.365492042  | -2.953317398 | 5.320273136  |
| O  | 0.825615092  | -2.524681481 | 4.320631893  |
| O  | 0.451352086  | 1.127291904  | -0.074412506 |
| C  | 0.192997673  | 2.276870151  | -0.174633470 |
| O  | -0.033402794 | 3.415552208  | -0.292336982 |

|                                                |              |              |              |
|------------------------------------------------|--------------|--------------|--------------|
| O                                              | 0.469683005  | −0.114043521 | 2.453604292  |
| C                                              | 0.311137130  | 0.182688041  | 3.585588845  |
| O                                              | 0.165030226  | 0.479823212  | 4.704318887  |
| <b>8CO<sub>2</sub>@Li<sup>+</sup>@coronene</b> |              |              |              |
| C                                              | −2.069468578 | −1.200575927 | −2.757258369 |
| C                                              | −2.318875127 | −0.343111040 | −1.635983951 |
| C                                              | −2.348445307 | −0.919303994 | −0.319642011 |
| C                                              | −2.123739770 | −2.329787868 | −0.146078304 |
| C                                              | −1.864279618 | −3.161142654 | −1.288517046 |
| C                                              | −1.849534816 | −2.559951524 | −2.589070576 |
| C                                              | −2.611681034 | −0.087985809 | 0.825014537  |
| C                                              | −2.161539020 | −2.906967242 | 1.170315400  |
| C                                              | −2.429482532 | −2.076716530 | 2.312521063  |
| C                                              | −2.653776540 | −0.667902031 | 2.139749340  |
| C                                              | −2.472091452 | −2.654649739 | 3.626256185  |
| C                                              | −2.246514062 | −4.063889775 | 3.766412956  |
| C                                              | −1.978901693 | −4.862970464 | 2.666195628  |
| C                                              | −1.929125519 | −4.313910508 | 1.343047114  |
| C                                              | −1.659856360 | −5.116506368 | 0.185903004  |
| C                                              | −1.633360419 | −4.560314690 | −1.084018589 |
| H                                              | −1.445822891 | −5.197953190 | −1.959813963 |
| H                                              | −1.480615435 | −6.193104059 | 0.318768623  |
| H                                              | −2.069084817 | −0.764298695 | −3.766199937 |
| H                                              | −1.663712638 | −3.198419470 | −3.464338420 |
| H                                              | −2.294502939 | −4.508162848 | 4.770425081  |
| H                                              | −1.804728322 | −5.940564610 | 2.797184681  |
| C                                              | −2.556804055 | 1.063479366  | −1.776374737 |
| C                                              | −2.803544694 | 1.865799457  | −0.672380530 |
| C                                              | −2.836067478 | 1.320172878  | 0.652593950  |
| H                                              | −2.557430448 | 1.502360675  | −2.784390984 |
| H                                              | −2.989363799 | 2.940992192  | −0.806285465 |
| C                                              | −3.092267240 | 2.124328031  | 1.810808834  |
| C                                              | −3.127704323 | 1.566238588  | 3.079619501  |
| C                                              | −2.913961014 | 0.163279115  | 3.281874636  |
| H                                              | −3.274057490 | 3.200545144  | 1.677524521  |
| H                                              | −3.332270865 | 2.200722945  | 3.953630833  |
| C                                              | −2.741868938 | −1.801695240 | 4.746589632  |
| H                                              | −2.784325858 | −2.246496656 | 5.750469480  |
| C                                              | −2.953083210 | −0.442132019 | 4.580232390  |
| H                                              | −3.158141556 | 0.194630278  | 5.452164153  |
| Li                                             | 0.481872699  | −0.872056861 | 0.816501921  |
| C                                              | 1.169034312  | −1.867407797 | −2.097013275 |
| O                                              | 1.377292728  | −2.265124466 | −3.174659915 |
| O                                              | 0.976234620  | −1.454469722 | −1.008960528 |
| O                                              | 1.061304070  | −2.647343718 | 1.529210127  |
| C                                              | 1.177257930  | −3.766445759 | 1.883029595  |
| O                                              | 1.308392383  | −4.872066723 | 2.234982246  |
| O                                              | 0.134059691  | 2.816150058  | 2.702866768  |

|                                                |              |              |              |
|------------------------------------------------|--------------|--------------|--------------|
| C                                              | −0.582186869 | 3.642910440  | 3.148641247  |
| O                                              | −1.292810483 | 4.463068674  | 3.590154750  |
| O                                              | 1.736309988  | −4.471053701 | −0.869455421 |
| C                                              | 1.402902937  | −5.580484700 | −1.099865558 |
| O                                              | 1.068778888  | −6.680583069 | −1.325724217 |
| O                                              | −0.230439282 | −3.486194358 | 6.457184656  |
| C                                              | 0.305111300  | −3.047792715 | 5.511689780  |
| O                                              | 0.841746818  | −2.603244560 | 4.558498811  |
| O                                              | 0.489801101  | 1.018438209  | 0.184263036  |
| C                                              | 0.314232433  | 2.142933339  | −0.129953832 |
| O                                              | 0.159692712  | 3.256656287  | −0.442993976 |
| O                                              | 0.454044688  | −0.203443778 | 2.693472312  |
| C                                              | 0.306144904  | 0.153727276  | 3.808566445  |
| O                                              | 0.170825840  | 0.511255966  | 4.911230675  |
| O                                              | −0.553689030 | 1.387444669  | −4.715548398 |
| C                                              | 0.139996941  | 1.190282848  | −3.790847117 |
| O                                              | 0.825768856  | 0.983908097  | −2.852911875 |
| <b>9CO<sub>2</sub>@Li<sup>+</sup>@coronene</b> |              |              |              |
| C                                              | −2.167324026 | −1.222394043 | −2.809706601 |
| C                                              | −2.385205134 | −0.366778264 | −1.680760099 |
| C                                              | −2.381364039 | −0.944126365 | −0.365374110 |
| C                                              | −2.165239877 | −2.355111352 | −0.200196163 |
| C                                              | −1.941583831 | −3.186429222 | −1.349652587 |
| C                                              | −1.951590926 | −2.583177925 | −2.649273706 |
| C                                              | −2.607338023 | −0.113180330 | 0.785449636  |
| C                                              | −2.176805827 | −2.934565652 | 1.114006254  |
| C                                              | −2.400776759 | −2.103743834 | 2.264101683  |
| C                                              | −2.616042476 | −0.693241618 | 2.099768413  |
| C                                              | −2.413700083 | −2.683357377 | 3.577657687  |
| C                                              | −2.196191326 | −4.094310962 | 3.710983021  |
| C                                              | −1.972376688 | −4.894752544 | 2.601775037  |
| C                                              | −1.956283454 | −4.344002291 | 1.278461080  |
| C                                              | −1.723419306 | −5.147562031 | 0.114238129  |
| C                                              | −1.719807849 | −4.588489237 | −1.154596114 |
| H                                              | −1.557286416 | −5.225325348 | −2.035971832 |
| H                                              | −1.552622603 | −6.226247912 | 0.241727865  |
| H                                              | −2.188281428 | −0.784076791 | −3.817554711 |
| H                                              | −1.790385058 | −3.222010002 | −3.529217468 |
| H                                              | −2.217683992 | −4.539575397 | 4.715612286  |
| H                                              | −1.804845985 | −5.974273812 | 2.726155315  |
| C                                              | −2.626789509 | 1.039708246  | −1.814449513 |
| C                                              | −2.845490600 | 1.841249671  | −0.704289648 |
| C                                              | −2.836928165 | 1.294914131  | 0.620563818  |
| H                                              | −2.656681898 | 1.478560354  | −2.822087792 |
| H                                              | −3.036745303 | 2.916293970  | −0.831321575 |
| C                                              | −3.055852553 | 2.099808765  | 1.785841275  |
| C                                              | −3.057164897 | 1.541570122  | 3.055133989  |
| C                                              | −2.845909592 | 0.137050907  | 3.249128998  |

|                                                 |              |              |              |
|-------------------------------------------------|--------------|--------------|--------------|
| H                                               | −3.240383970 | 3.176125770  | 1.657320045  |
| H                                               | −3.236175328 | 2.175947535  | 3.934873855  |
| C                                               | −2.652125945 | −1.831362160 | 4.705884882  |
| H                                               | −2.675515718 | −2.278475786 | 5.709312429  |
| C                                               | −2.860588458 | −0.470681149 | 4.546958954  |
| H                                               | −3.043149778 | 0.165554997  | 5.424219122  |
| Li                                              | 0.809689910  | −0.786376550 | 0.794639105  |
| C                                               | 1.070027022  | −1.870447772 | −2.151005875 |
| O                                               | 1.246409165  | −2.240287849 | −3.244274592 |
| O                                               | 0.909480601  | −1.494775442 | −1.044092970 |
| O                                               | 0.905946386  | −2.658363830 | 1.561889428  |
| C                                               | 1.083316616  | −3.777437420 | 1.889809615  |
| O                                               | 1.273953348  | −4.881555606 | 2.219656477  |
| O                                               | 0.202812861  | 2.918519168  | 2.619368396  |
| C                                               | −0.556117873 | 3.716385207  | 3.047425818  |
| O                                               | −1.307576297 | 4.508353638  | 3.472320790  |
| O                                               | 1.677818658  | −4.446495569 | −0.879496857 |
| C                                               | 1.338327967  | −5.544748080 | −1.151448945 |
| O                                               | 1.003106002  | −6.634855369 | −1.419995672 |
| O                                               | −0.164560117 | −3.466103899 | 6.416767771  |
| C                                               | 0.379972428  | −2.980772160 | 5.499823700  |
| O                                               | 0.927442960  | −2.491068534 | 4.575008246  |
| O                                               | 0.450805289  | 1.056001197  | 0.141218654  |
| C                                               | 0.230969979  | 2.159395225  | −0.212316079 |
| O                                               | 0.042196313  | 3.258217221  | −0.560086780 |
| O                                               | 0.526550367  | −0.107515347 | 2.746754957  |
| C                                               | 0.293539152  | 0.288303352  | 3.833622611  |
| O                                               | 0.090592364  | 0.685301673  | 4.913021140  |
| O                                               | −0.640218147 | 1.350594637  | −4.750757298 |
| C                                               | 0.055191433  | 1.165093448  | −3.825192781 |
| O                                               | 0.743933632  | 0.971462819  | −2.886531708 |
| O                                               | 2.901834685  | −0.514542935 | 1.077500372  |
| C                                               | 3.556823418  | −0.327790247 | 2.045708636  |
| O                                               | 4.199677552  | −0.142690054 | 3.003078058  |
| <b>10CO<sub>2</sub>@Li<sup>+</sup>@coronene</b> |              |              |              |
| C                                               | −2.255718711 | −1.175784947 | −2.796023351 |
| C                                               | −2.463700879 | −0.322207384 | −1.663521413 |
| C                                               | −2.399286459 | −0.893571183 | −0.346696770 |
| C                                               | −2.128369864 | −2.295622216 | −0.183822071 |
| C                                               | −1.911435674 | −3.123664562 | −1.337260444 |
| C                                               | −1.987679054 | −2.527453383 | −2.638165160 |
| C                                               | −2.621080896 | −0.066919493 | 0.807932579  |
| C                                               | −2.085117442 | −2.870795582 | 1.131871721  |
| C                                               | −2.317347306 | −2.046217526 | 2.284929305  |
| C                                               | −2.581253224 | −0.643780121 | 2.123031098  |
| C                                               | −2.289599854 | −2.624413536 | 3.598654895  |
| C                                               | −2.022930372 | −4.027030635 | 3.728502777  |
| C                                               | −1.784330217 | −4.820076029 | 2.617076445  |

|    |              |              |              |
|----|--------------|--------------|--------------|
| C  | -1.810604842 | -4.271296228 | 1.293449106  |
| C  | -1.576566130 | -5.068866325 | 0.125447757  |
| C  | -1.630548733 | -4.515251906 | -1.144648293 |
| H  | -1.469973864 | -5.149015186 | -2.028614111 |
| H  | -1.364105686 | -6.140354636 | 0.250415857  |
| H  | -2.331010442 | -0.744162826 | -3.804147256 |
| H  | -1.836876377 | -3.165227746 | -3.520717764 |
| H  | -2.014538722 | -4.473012779 | 4.733058192  |
| H  | -1.576302699 | -5.892558417 | 2.740379014  |
| C  | -2.756109606 | 1.074780384  | -1.794015129 |
| C  | -2.964211140 | 1.873269546  | -0.679082399 |
| C  | -2.896489586 | 1.333313641  | 0.646417456  |
| H  | -2.832635212 | 1.509201280  | -2.801081098 |
| H  | -3.191811522 | 2.941428246  | -0.803334958 |
| C  | -3.103994358 | 2.135653928  | 1.815518753  |
| C  | -3.056591245 | 1.580866973  | 3.085512882  |
| C  | -2.806425401 | 0.182320544  | 3.275946991  |
| H  | -3.320153645 | 3.206489202  | 1.690802047  |
| H  | -3.225671301 | 2.213061185  | 3.968637063  |
| C  | -2.529497030 | -1.777580958 | 4.730491061  |
| H  | -2.520896569 | -2.223777496 | 5.734750649  |
| C  | -2.774534455 | -0.422732810 | 4.574738482  |
| H  | -2.953172429 | 0.210325722  | 5.455173324  |
| Li | 0.839798716  | -0.746788307 | 0.620005453  |
| C  | 1.035926435  | -1.869217953 | -2.310198705 |
| O  | 1.176383382  | -2.310386013 | -3.381905773 |
| O  | 0.913953079  | -1.419004892 | -1.226181720 |
| O  | 1.073283999  | -2.541785036 | 1.400516376  |
| C  | 1.281786126  | -3.635914959 | 1.791091436  |
| O  | 1.481034150  | -4.718334037 | 2.178163404  |
| O  | 0.203377902  | 3.017478392  | 2.305433835  |
| C  | -0.514363102 | 3.761419333  | 2.877576150  |
| O  | -1.224814529 | 4.499710910  | 3.445203355  |
| O  | 1.780968437  | -4.371525322 | -0.968728361 |
| C  | 1.442352302  | -5.471108084 | -1.236113293 |
| O  | 1.106240842  | -6.561945609 | -1.500893780 |
| O  | 0.058526959  | -3.386606929 | 6.367493406  |
| C  | 0.507713397  | -2.844238117 | 5.431954238  |
| O  | 0.962080077  | -2.297428256 | 4.488842093  |
| O  | 0.369626945  | 1.158418170  | -0.090055021 |
| C  | 0.103506718  | 2.233530021  | -0.497011534 |
| O  | -0.123410260 | 3.305165645  | -0.902976157 |
| O  | 0.509638931  | -0.010185402 | 2.501882654  |
| C  | 0.356490151  | 0.427776451  | 3.586004087  |
| O  | 0.216543031  | 0.870288835  | 4.657418729  |
| O  | -0.924526784 | 1.420590915  | -4.840437291 |
| C  | -0.152245327 | 1.191407482  | -3.988723797 |
| O  | 0.614382716  | 0.956209079  | -3.122486891 |
| O  | 3.720690601  | -2.550352111 | 3.126270080  |



|                                                 |              |              |              |
|-------------------------------------------------|--------------|--------------|--------------|
| C                                               | 3.557100391  | −1.425906692 | 3.424122839  |
| O                                               | 3.386912852  | −0.294389586 | 3.704042010  |
| O                                               | 2.872153976  | −0.070462188 | 0.713774399  |
| C                                               | 3.263288866  | 1.018466954  | 0.968938830  |
| O                                               | 3.643016740  | 2.095305183  | 1.209773826  |
| <b>11CO<sub>2</sub>@Li<sup>+</sup>@coronene</b> |              |              |              |
| C                                               | −2.269911107 | −1.197337168 | −2.795375819 |
| C                                               | −2.488150727 | −0.337675905 | −1.669637661 |
| C                                               | −2.413437791 | −0.897006274 | −0.348335723 |
| C                                               | −2.122397446 | −2.293688668 | −0.174853130 |
| C                                               | −1.897242434 | −3.128256359 | −1.321682551 |
| C                                               | −1.982860668 | −2.543800373 | −2.627200726 |
| C                                               | −2.641426110 | −0.063728625 | 0.800456437  |
| C                                               | −2.070608824 | −2.857840157 | 1.145556884  |
| C                                               | −2.312983984 | −2.027644518 | 2.292544416  |
| C                                               | −2.589823500 | −0.628870396 | 2.120080222  |
| C                                               | −2.284199528 | −2.596767594 | 3.609935036  |
| C                                               | −2.008958945 | −3.996937379 | 3.750147524  |
| C                                               | −1.758435898 | −4.794698508 | 2.645015889  |
| C                                               | −1.783872602 | −4.254549752 | 1.317743613  |
| C                                               | −1.543007873 | −5.058999682 | 0.155836497  |
| C                                               | −1.602026874 | −4.515509607 | −1.118518984 |
| H                                               | −1.439288030 | −5.155324478 | −1.997777138 |
| H                                               | −1.322106902 | −6.127569820 | 0.289473130  |
| H                                               | −2.350491995 | −0.774758459 | −3.806790560 |
| H                                               | −1.823774279 | −3.186028866 | −3.505027477 |
| H                                               | −2.001882012 | −4.436192697 | 4.757569144  |
| H                                               | −1.541759996 | −5.864540565 | 2.775664777  |
| C                                               | −2.796604396 | 1.054926308  | −1.810598069 |
| C                                               | −3.010850323 | 1.860028324  | −0.701587723 |
| C                                               | −2.932292358 | 1.331897365  | 0.628267248  |
| H                                               | −2.878056305 | 1.480355318  | −2.821262492 |
| H                                               | −3.251004795 | 2.924444835  | −0.834015805 |
| C                                               | −3.137162116 | 2.143027425  | 1.791782899  |
| C                                               | −3.077203969 | 1.600029706  | 3.066243855  |
| C                                               | −2.816287602 | 0.204721276  | 3.267507371  |
| H                                               | −3.361857404 | 3.211128686  | 1.659005557  |
| H                                               | −3.245716215 | 2.238540767  | 3.944995859  |
| C                                               | −2.528333108 | −1.743214221 | 4.735690969  |
| H                                               | −2.517721645 | −2.182583986 | 5.743067260  |
| C                                               | −2.778033055 | −0.390265717 | 4.570713381  |
| H                                               | −2.958820739 | 0.248205595  | 5.446845186  |
| Li                                              | 0.838694871  | −0.654500947 | 0.575648835  |
| C                                               | 1.041195930  | −1.813546580 | −2.339774937 |
| O                                               | 1.160017192  | −2.190757964 | −3.437166346 |
| O                                               | 0.927599274  | −1.436364683 | −1.226522731 |
| O                                               | 1.177428194  | −2.481198157 | 1.413980919  |
| C                                               | 1.323794900  | −3.611586599 | 1.721196961  |

|                                                 |              |              |              |
|-------------------------------------------------|--------------|--------------|--------------|
| O                                               | 1.468939801  | −4.726813357 | 2.033026844  |
| O                                               | 0.206960103  | 3.033865370  | 2.266305182  |
| C                                               | −0.518365171 | 3.779712883  | 2.826676454  |
| O                                               | −1.236387335 | 4.518774425  | 3.383455014  |
| O                                               | 1.814523859  | −4.372962204 | −1.057712849 |
| C                                               | 1.461765253  | −5.485559914 | −1.241064447 |
| O                                               | 1.112011847  | −6.587956523 | −1.423895592 |
| O                                               | 0.096994846  | −3.380484942 | 6.350941229  |
| C                                               | 0.512415984  | −2.814807595 | 5.413524366  |
| O                                               | 0.930212499  | −2.243449869 | 4.468273642  |
| O                                               | 0.264467011  | 1.158477136  | −0.152857069 |
| C                                               | 0.030029066  | 2.245074611  | −0.546314597 |
| O                                               | −0.170576584 | 3.327882350  | −0.936709303 |
| O                                               | 0.502068258  | 0.037456824  | 2.463701635  |
| C                                               | 0.372343329  | 0.448303992  | 3.561124373  |
| O                                               | 0.257986819  | 0.868636312  | 4.644671446  |
| O                                               | −0.944122123 | 1.323960902  | −4.899944860 |
| C                                               | −0.177564954 | 1.156644449  | −4.028811315 |
| O                                               | 0.582665280  | 0.983174272  | −3.142732317 |
| O                                               | 3.731097980  | −2.970217500 | 3.634811772  |
| C                                               | 3.635839356  | −1.807022530 | 3.517496364  |
| O                                               | 3.529417116  | −0.638587142 | 3.399906322  |
| O                                               | 2.824589526  | 0.099200725  | 0.600355547  |
| C                                               | 3.320746386  | 1.037760992  | 1.126349154  |
| O                                               | 3.802547801  | 1.974632909  | 1.626926533  |
| O                                               | 3.925781520  | −2.068397555 | −1.623684217 |
| C                                               | 4.038901127  | −2.443790382 | −0.515897101 |
| O                                               | 4.142753986  | −2.807446560 | 0.598935930  |
| <b>12CO<sub>2</sub>@Li<sup>+</sup>@coronene</b> |              |              |              |
| C                                               | −2.404170679 | −1.260915477 | −2.925834888 |
| C                                               | −2.652750143 | −0.379482467 | −1.823320377 |
| C                                               | −2.543804943 | −0.895115892 | −0.487201946 |
| C                                               | −2.180131921 | −2.267923675 | −0.275162372 |
| C                                               | −1.937414898 | −3.128407126 | −1.398906142 |
| C                                               | −2.062833697 | −2.589259419 | −2.720392690 |
| C                                               | −2.789173124 | −0.035533231 | 0.636827870  |
| C                                               | −2.046749875 | −2.777997361 | 1.060777371  |
| C                                               | −2.278800270 | −1.914723227 | 2.185511318  |
| C                                               | −2.651258503 | −0.543499007 | 1.972738986  |
| C                                               | −2.143527101 | −2.423827292 | 3.521488660  |
| C                                               | −1.787340554 | −3.800491454 | 3.700891790  |
| C                                               | −1.561103592 | −4.633232310 | 2.616327002  |
| C                                               | −1.678560869 | −4.150278968 | 1.271856453  |
| C                                               | −1.440575190 | −4.985940898 | 0.131776983  |
| C                                               | −1.566276650 | −4.491137856 | −1.157404299 |
| H                                               | −1.394666745 | −5.152286210 | −2.019155754 |
| H                                               | −1.160133800 | −6.035910676 | 0.295545908  |
| H                                               | −2.497120545 | −0.867670485 | −3.947778142 |

|    |              |              |              |
|----|--------------|--------------|--------------|
| H  | −1.878790765 | −3.249069095 | −3.580213430 |
| H  | −1.713063192 | −4.198577890 | 4.722872625  |
| H  | −1.290127535 | −5.686361160 | 2.777014544  |
| C  | −3.016062397 | 0.995730345  | −2.004232323 |
| C  | −3.260536050 | 1.823096615  | −0.918971295 |
| C  | −3.152648778 | 1.337562673  | 0.425232197  |
| H  | −3.114718300 | 1.386513434  | −3.026923028 |
| H  | −3.543255556 | 2.872953238  | −1.080290757 |
| C  | −3.374265267 | 2.177377547  | 1.565392881  |
| C  | −3.242342414 | 1.685750720  | 2.855035211  |
| C  | −2.878443216 | 0.321239727  | 3.096644819  |
| H  | −3.655982846 | 3.227198424  | 1.401861620  |
| H  | −3.427932514 | 2.343767937  | 3.716012035  |
| C  | −2.380735778 | −1.538551187 | 4.623245312  |
| H  | −2.290792604 | −1.930351738 | 5.646073820  |
| C  | −2.733085509 | −0.213115554 | 4.417894965  |
| H  | −2.913325951 | 0.447649428  | 5.277678753  |
| Li | 0.841030606  | −0.632223460 | 1.003041384  |
| C  | 0.953469132  | −1.762712888 | −1.980941572 |
| O  | 1.107014741  | −2.006671216 | −3.113893460 |
| O  | 0.816510372  | −1.507085321 | −0.838790631 |
| O  | 1.226056348  | −2.541980576 | 1.766823250  |
| C  | 1.424147802  | −3.704639032 | 1.797835048  |
| O  | 1.622522676  | −4.855355540 | 1.836415109  |
| O  | −0.038279300 | 2.912827804  | 2.736103959  |
| C  | −0.811043395 | 3.771534548  | 2.982140766  |
| O  | −1.574433737 | 4.626779406  | 3.224386324  |
| O  | 1.902489254  | −4.317509445 | −1.145841390 |
| C  | 1.541868501  | −5.428476177 | −1.322693961 |
| O  | 1.184987552  | −6.529521327 | −1.499170972 |
| O  | −0.059351462 | −3.217303559 | 6.730037616  |
| C  | 0.542808993  | −2.798984230 | 5.815363808  |
| O  | 1.137614099  | −2.377588369 | 4.887770167  |
| O  | 0.035585142  | 1.040213026  | 0.233065144  |
| C  | −0.152235886 | 2.163081953  | −0.071756972 |
| O  | −0.332369921 | 3.276170601  | −0.379130752 |
| O  | 0.428390962  | −0.089720329 | 2.867381652  |
| C  | 0.409473719  | 0.306073597  | 3.977189306  |
| O  | 0.400176100  | 0.700763648  | 5.076616427  |
| O  | −0.758263885 | 1.271160781  | −4.631469826 |
| C  | −0.071364895 | 1.159984941  | −3.689803908 |
| O  | 0.615822266  | 1.045501441  | −2.735286997 |
| O  | 3.820123491  | −3.141142249 | 3.574694135  |
| C  | 3.712539886  | −1.971902847 | 3.581312956  |
| O  | 3.599096843  | −0.799040889 | 3.572913293  |
| O  | 2.675540186  | 0.237020962  | 0.917208825  |
| C  | 3.852796004  | 0.324982370  | 0.861659426  |
| O  | 5.012921341  | 0.434538747  | 0.805282188  |
| O  | 4.868797473  | −3.266098877 | −1.621311102 |

|   |             |              |              |
|---|-------------|--------------|--------------|
| C | 4.416988557 | −2.892082130 | −0.607624451 |
| O | 3.960463915 | −2.513396977 | 0.413555000  |
| O | 3.535639037 | −0.346745834 | −1.993330615 |
| C | 3.508891333 | 0.085856378  | −3.092790273 |
| O | 3.470420835 | 0.514987872  | −4.181287668 |
|   |             |              |              |
|   |             |              |              |
|   |             |              |              |
|   |             |              |              |
|   |             |              |              |
|   |             |              |              |
|   |             |              |              |
|   |             |              |              |
|   |             |              |              |
|   |             |              |              |
| O | 1.453064000 | 5.553011000  | 2.310000000  |
| O | 3.511672000 | 3.301534000  | −2.357570000 |
| O | 4.747454000 | −1.320673000 | 2.551780000  |
| O | 5.571283000 | 1.472618000  | −2.202134000 |
| O | 3.685930000 | −3.913454000 | 2.549466000  |
| O | 1.456607000 | −4.504595000 | −2.536882000 |
| C | 2.009133000 | 4.967242000  | 1.171074000  |
| C | 1.309577000 | 5.122599000  | −0.046078000 |
| C | 1.859289000 | 4.524824000  | −1.191829000 |
| H | 1.343811000 | 4.613619000  | −2.157908000 |
| C | 3.079165000 | 3.813539000  | −1.164818000 |
| C | 3.798469000 | 3.704431000  | 0.056302000  |
| C | 3.230083000 | 4.277780000  | 1.214036000  |
| H | 3.777491000 | 4.206927000  | 2.168282000  |
| C | 5.166943000 | 3.033739000  | 0.136853000  |
| H | 5.798125000 | 3.376180000  | −0.707339000 |
| H | 5.665659000 | 3.385244000  | 1.060637000  |
| C | 5.149747000 | 1.509073000  | 0.153427000  |
| C | 5.364365000 | 0.760398000  | −1.022646000 |
| C | 5.382508000 | −0.644403000 | −0.997120000 |
| H | 5.568113000 | −1.201940000 | −1.928001000 |
| C | 5.177369000 | −1.362179000 | 0.195375000  |
| C | 4.937736000 | −0.612646000 | 1.371442000  |
| C | 4.928220000 | 0.791773000  | 1.346297000  |
| H | 4.752298000 | 1.351135000  | 2.278997000  |
| C | 5.191759000 | −2.883435000 | 0.211149000  |
| H | 5.796273000 | −3.230589000 | −0.649216000 |
| H | 5.702853000 | −3.238260000 | 1.127570000  |
| C | 3.814020000 | −3.537830000 | 0.125621000  |
| C | 3.185890000 | −3.699024000 | −1.123937000 |
| H | 3.656525000 | −3.303931000 | −2.035625000 |
| C | 1.963638000 | −4.386429000 | −1.268872000 |
| C | 1.360674000 | −4.972670000 | −0.121180000 |
| C | 1.963181000 | −4.764617000 | 1.133895000  |
| H | 1.507971000 | −5.187830000 | 2.040448000  |

|   |              |              |              |
|---|--------------|--------------|--------------|
| C | 3.162763000  | −4.041461000 | 1.282804000  |
| C | 0.101073000  | −5.829298000 | −0.226438000 |
| H | 0.113678000  | −6.382533000 | −1.185900000 |
| H | 0.130684000  | −6.586070000 | 0.581079000  |
| H | 5.594631000  | 0.851578000  | −2.955734000 |
| H | 4.161714000  | −3.053550000 | 2.605247000  |
| H | 4.325062000  | 2.749993000  | −2.262424000 |
| H | 1.997435000  | 5.327133000  | 3.087910000  |
| H | 4.492080000  | −0.706444000 | 3.265959000  |
| H | 0.492733000  | −4.711355000 | −2.511267000 |
| O | −1.304424000 | −4.833483000 | −2.493660000 |
| O | −3.464479000 | −3.884676000 | 2.559873000  |
| O | −5.396234000 | 1.370783000  | −2.196897000 |
| O | −4.729921000 | −1.428552000 | 2.577373000  |
| O | −3.665102000 | 3.571191000  | −2.389412000 |
| O | −1.276661000 | 5.021533000  | 2.445164000  |
| C | −1.881430000 | −4.570519000 | −1.250111000 |
| C | −1.208498000 | −5.057835000 | −0.105936000 |
| C | −1.778021000 | −4.784774000 | 1.148199000  |
| H | −1.279189000 | −5.129011000 | 2.064382000  |
| C | −2.989445000 | −4.072924000 | 1.290240000  |
| C | −3.687216000 | −3.641793000 | 0.129919000  |
| C | −3.099283000 | −3.885039000 | −1.130486000 |
| H | −3.625412000 | −3.554417000 | −2.040479000 |
| C | −5.066315000 | −2.991179000 | 0.217876000  |
| H | −5.574349000 | −3.350980000 | 1.134166000  |
| H | −5.670563000 | −3.342969000 | −0.640827000 |
| C | −5.065071000 | −1.468301000 | 0.204641000  |
| C | −4.879591000 | −0.720581000 | 1.388850000  |
| C | −4.879898000 | 0.683565000  | 1.367979000  |
| H | −4.744394000 | 1.242361000  | 2.307423000  |
| C | −5.058163000 | 1.403374000  | 0.171036000  |
| C | −5.219907000 | 0.656470000  | −1.016891000 |
| C | −5.230577000 | −0.748659000 | −0.994510000 |
| H | −5.384548000 | −1.303960000 | −1.933165000 |
| C | −5.080510000 | 2.926616000  | 0.163518000  |
| H | −5.569035000 | 3.267691000  | 1.096416000  |
| H | −5.715282000 | 3.274406000  | −0.674987000 |
| C | −3.711763000 | 3.596760000  | 0.074114000  |
| C | −3.039844000 | 3.977102000  | 1.251908000  |
| H | −3.479547000 | 3.752302000  | 2.234404000  |
| C | −1.820237000 | 4.683036000  | 1.232982000  |
| C | −1.260234000 | 5.053322000  | −0.020227000 |
| C | −1.906494000 | 4.630757000  | −1.196272000 |
| H | −1.487218000 | 4.893344000  | −2.177852000 |
| C | −3.109555000 | 3.895881000  | −1.177514000 |
| C | 0.002460000  | 5.905236000  | −0.112456000 |
| H | −0.007056000 | 6.666744000  | 0.692486000  |
| H | −0.022494000 | 6.453670000  | −1.073196000 |

|                            |              |              |              |
|----------------------------|--------------|--------------|--------------|
| H                          | −4.520892000 | −0.809996000 | 3.303298000  |
| H                          | −4.332074000 | 2.854150000  | −2.291583000 |
| H                          | −4.002801000 | −3.058040000 | 2.593406000  |
| H                          | −1.820975000 | −4.386864000 | −3.190843000 |
| H                          | −5.431258000 | 0.753891000  | −2.952615000 |
| H                          | −0.333036000 | 5.292512000  | 2.355580000  |
| H                          | −1.859235000 | −0.124166000 | −0.269686000 |
| H                          | −2.152238000 | −0.833444000 | −0.277184000 |
| H                          | 0.086042000  | 2.231266000  | −0.018367000 |
| H                          | −0.295081000 | 1.903839000  | 0.561255000  |
| H                          | 2.658227000  | 0.952841000  | −2.673768000 |
| H                          | 2.471991000  | 0.209642000  | −2.622673000 |
| <b>PPA-H<sub>2</sub>-4</b> |              |              |              |
| O                          | 1.502309000  | 5.440421000  | 2.405454000  |
| O                          | 3.495275000  | 3.451045000  | −2.408779000 |
| O                          | 4.965119000  | −1.253093000 | 2.507340000  |
| O                          | 5.431774000  | 1.492543000  | −2.322474000 |
| O                          | 3.878079000  | −3.826707000 | 2.598139000  |
| O                          | 1.440760000  | −4.637621000 | −2.361369000 |
| C                          | 2.049773000  | 4.929499000  | 1.225324000  |
| C                          | 1.327431000  | 5.143158000  | 0.030885000  |
| C                          | 1.856552000  | 4.608641000  | −1.154949000 |
| H                          | 1.318164000  | 4.738167000  | −2.103917000 |
| C                          | 3.080252000  | 3.904520000  | −1.186136000 |
| C                          | 3.826008000  | 3.744197000  | 0.013254000  |
| C                          | 3.277701000  | 4.252120000  | 1.210138000  |
| H                          | 3.842054000  | 4.134171000  | 2.149287000  |
| C                          | 5.198930000  | 3.077411000  | 0.031378000  |
| H                          | 5.788473000  | 3.416547000  | −0.843691000 |
| H                          | 5.741163000  | 3.433685000  | 0.928359000  |
| C                          | 5.182648000  | 1.553116000  | 0.058392000  |
| C                          | 5.303529000  | 0.793186000  | −1.124450000 |
| C                          | 5.322798000  | −0.611579000 | −1.086424000 |
| H                          | 5.445069000  | −1.177578000 | −2.022742000 |
| C                          | 5.213187000  | −1.317980000 | 0.125608000  |
| C                          | 5.063123000  | −0.556950000 | 1.308527000  |
| C                          | 5.053082000  | 0.846914000  | 1.271094000  |
| H                          | 4.953398000  | 1.415555000  | 2.209399000  |
| C                          | 5.250759000  | −2.839255000 | 0.156771000  |
| H                          | 5.809650000  | −3.185400000 | −0.734196000 |
| H                          | 5.823556000  | −3.173138000 | 1.044204000  |
| C                          | 3.885037000  | −3.523166000 | 0.160262000  |
| C                          | 3.205553000  | −3.744548000 | −1.052386000 |
| H                          | 3.630408000  | −3.374621000 | −1.996386000 |
| C                          | 1.995434000  | −4.463201000 | −1.116767000 |
| C                          | 1.450628000  | −5.011013000 | 0.076805000  |
| C                          | 2.107181000  | −4.747782000 | 1.293634000  |
| H                          | 1.698877000  | −5.145386000 | 2.233245000  |
| C                          | 3.299780000  | −4.000878000 | 1.362756000  |

|   |              |              |              |
|---|--------------|--------------|--------------|
| C | 0.189905000  | −5.870978000 | 0.068739000  |
| H | 0.201512000  | −6.543082000 | −0.812439000 |
| H | 0.212704000  | −6.521437000 | 0.964079000  |
| H | 5.354182000  | 0.871175000  | −3.072285000 |
| H | 4.354669000  | −2.965340000 | 2.606126000  |
| H | 4.279960000  | 2.855529000  | −2.340040000 |
| H | 2.037490000  | 5.137357000  | 3.163428000  |
| H | 4.764915000  | −0.632627000 | 3.233827000  |
| H | 0.516995000  | −4.982169000 | −2.303909000 |
| O | −1.248882000 | −5.230254000 | −2.308139000 |
| O | −3.335815000 | −3.545387000 | 2.582409000  |
| O | −4.860745000 | 1.353283000  | −2.304811000 |
| O | −5.135610000 | −1.439451000 | 2.511347000  |
| O | −3.747686000 | 3.908621000  | −2.405517000 |
| O | −1.163785000 | 4.667718000  | 2.487820000  |
| C | −1.807634000 | −4.781308000 | −1.107992000 |
| C | −1.117901000 | −5.085898000 | 0.087190000  |
| C | −1.671119000 | −4.626977000 | 1.293197000  |
| H | −1.158122000 | −4.828263000 | 2.243577000  |
| C | −2.887204000 | −3.909423000 | 1.345397000  |
| C | −3.599728000 | −3.658889000 | 0.140571000  |
| C | −3.027240000 | −4.089816000 | −1.075072000 |
| H | −3.569173000 | −3.906947000 | −2.016846000 |
| C | −4.975543000 | −2.998776000 | 0.140489000  |
| H | −5.547618000 | −3.348346000 | 1.022558000  |
| H | −5.525602000 | −3.353335000 | −0.752492000 |
| C | −4.973192000 | −1.474932000 | 0.124182000  |
| C | −5.061010000 | −0.726907000 | 1.317287000  |
| C | −5.096869000 | 0.677629000  | 1.293405000  |
| H | −5.185487000 | 1.233953000  | 2.239699000  |
| C | −5.030803000 | 1.395528000  | 0.084885000  |
| C | −4.915212000 | 0.647131000  | −1.109097000 |
| C | −4.893055000 | −0.756729000 | −1.085190000 |
| H | −4.823731000 | −1.314190000 | −2.033026000 |
| C | −5.058628000 | 2.916789000  | 0.069256000  |
| H | −5.586811000 | 3.261431000  | 0.979270000  |
| H | −5.652146000 | 3.264612000  | −0.798831000 |
| C | −3.685880000 | 3.587008000  | 0.029720000  |
| C | −2.969027000 | 3.795838000  | 1.223606000  |
| H | −3.367346000 | 3.425737000  | 2.179012000  |
| C | −1.755718000 | 4.512148000  | 1.257382000  |
| C | −1.243082000 | 5.063805000  | 0.052334000  |
| C | −1.935691000 | 4.810102000  | −1.146762000 |
| H | −1.554147000 | 5.212468000  | −2.095657000 |
| C | −3.133509000 | 4.070205000  | −1.186343000 |
| C | 0.016983000  | 5.924005000  | 0.028580000  |
| H | 0.009233000  | 6.622792000  | 0.888707000  |
| H | −0.012241000 | 6.546921000  | −0.885709000 |
| H | −5.123801000 | −0.817970000 | 3.264426000  |

|                            |              |              |              |
|----------------------------|--------------|--------------|--------------|
| H                          | −4.239816000 | 3.055474000  | −2.402689000 |
| H                          | −4.031704000 | −2.847582000 | 2.528726000  |
| H                          | −1.722643000 | −4.817673000 | −3.055944000 |
| H                          | −4.669259000 | 0.740487000  | −3.039973000 |
| H                          | −0.261710000 | 5.061794000  | 2.418200000  |
| H                          | −1.981519000 | 0.473784000  | 0.563414000  |
| H                          | −1.999379000 | −0.283964000 | 0.443297000  |
| H                          | 0.608531000  | 2.026458000  | 2.326632000  |
| H                          | 0.219833000  | 2.659835000  | 2.518233000  |
| H                          | 2.643656000  | 1.191477000  | −3.093981000 |
| H                          | 2.388554000  | 0.477802000  | −3.220686000 |
| H                          | 0.157173000  | −2.836216000 | −3.401212000 |
| H                          | −0.299630000 | −2.308551000 | −3.724361000 |
| <b>PPA-H<sub>2</sub>-5</b> |              |              |              |
| O                          | 1.519604000  | 5.284839000  | 2.351005000  |
| O                          | 3.530822000  | 3.507218000  | −2.538381000 |
| O                          | 5.083549000  | −1.310037000 | 2.363857000  |
| O                          | 5.340819000  | 1.447165000  | −2.475083000 |
| O                          | 3.847413000  | −3.814268000 | 2.466771000  |
| O                          | 1.374213000  | −4.693192000 | −2.463059000 |
| C                          | 2.068405000  | 4.826166000  | 1.150504000  |
| C                          | 1.352874000  | 5.097132000  | −0.037036000 |
| C                          | 1.888261000  | 4.615244000  | −1.242650000 |
| H                          | 1.355779000  | 4.790831000  | −2.187545000 |
| C                          | 3.109489000  | 3.908875000  | −1.299343000 |
| C                          | 3.849479000  | 3.692794000  | −0.105436000 |
| C                          | 3.294795000  | 4.146834000  | 1.110166000  |
| H                          | 3.852474000  | 3.984356000  | 2.046499000  |
| C                          | 5.222948000  | 3.025839000  | −0.109292000 |
| H                          | 5.797817000  | 3.366956000  | −0.993262000 |
| H                          | 5.778674000  | 3.380583000  | 0.779983000  |
| C                          | 5.205110000  | 1.501407000  | −0.084074000 |
| C                          | 5.255566000  | 0.745206000  | −1.274793000 |
| C                          | 5.260432000  | −0.659941000 | −1.242122000 |
| H                          | 5.325563000  | −1.224690000 | −2.185138000 |
| C                          | 5.206165000  | −1.369805000 | −0.027929000 |
| C                          | 5.131367000  | −0.611605000 | 1.163632000  |
| C                          | 5.135810000  | 0.792720000  | 1.131199000  |
| H                          | 5.093307000  | 1.357732000  | 2.075935000  |
| C                          | 5.218420000  | −2.892216000 | −0.002976000 |
| H                          | 5.754415000  | −3.245235000 | −0.905159000 |
| H                          | 5.801067000  | −3.238602000 | 0.872978000  |
| C                          | 3.842187000  | −3.554234000 | 0.022416000  |
| C                          | 3.152576000  | −3.790263000 | −1.182321000 |
| H                          | 3.575741000  | −3.444488000 | −2.136353000 |
| C                          | 1.936225000  | −4.501314000 | −1.228544000 |
| C                          | 1.399880000  | −5.025456000 | −0.019482000 |
| C                          | 2.062909000  | −4.742371000 | 1.189120000  |
| H                          | 1.660521000  | −5.123519000 | 2.138236000  |



|   |              |              |              |
|---|--------------|--------------|--------------|
| C | 3.260966000  | −4.002885000 | 1.237848000  |
| C | 0.147779000  | −5.896043000 | −0.009996000 |
| H | 0.174897000  | −6.594672000 | −0.869556000 |
| H | 0.169018000  | −6.516131000 | 0.906687000  |
| H | 5.188829000  | 0.835495000  | −3.221267000 |
| H | 4.362428000  | −2.975117000 | 2.454532000  |
| H | 4.281026000  | 2.866922000  | −2.480752000 |
| H | 2.025622000  | 4.909394000  | 3.096430000  |
| H | 4.912966000  | −0.689666000 | 3.098073000  |
| H | 0.453162000  | −5.038642000 | −2.399502000 |
| O | −1.317314000 | −5.444761000 | −2.404261000 |
| O | −3.363330000 | −3.415308000 | 2.369115000  |
| O | −4.684901000 | 1.314409000  | −2.487446000 |
| O | −5.348183000 | −1.510888000 | 2.272381000  |
| O | −3.702709000 | 3.930640000  | −2.541855000 |
| O | −1.139113000 | 4.503065000  | 2.386458000  |
| C | −1.879510000 | −4.926465000 | −1.235807000 |
| C | −1.168188000 | −5.126692000 | −0.031723000 |
| C | −1.711932000 | −4.581428000 | 1.143309000  |
| H | −1.183527000 | −4.700786000 | 2.098961000  |
| C | −2.936413000 | −3.878837000 | 1.154974000  |
| C | −3.668474000 | −3.728710000 | −0.054061000 |
| C | −3.107662000 | −4.249436000 | −1.239421000 |
| H | −3.661856000 | −4.139757000 | −2.185763000 |
| C | −5.037493000 | −3.055831000 | −0.095812000 |
| H | −5.649705000 | −3.404758000 | 0.759642000  |
| H | −5.559410000 | −3.395354000 | −1.011186000 |
| C | −5.011284000 | −1.531550000 | −0.097907000 |
| C | −5.170259000 | −0.791645000 | 1.092514000  |
| C | −5.173554000 | 0.613501000  | 1.080043000  |
| H | −5.321619000 | 1.163586000  | 2.022026000  |
| C | −5.011754000 | 1.340029000  | −0.113744000 |
| C | −4.828935000 | 0.598956000  | −1.305194000 |
| C | −4.831680000 | −0.805310000 | −1.292421000 |
| H | −4.700369000 | −1.357652000 | −2.236692000 |
| C | −5.029279000 | 2.861074000  | −0.117872000 |
| H | −5.578460000 | 3.199283000  | 0.782275000  |
| H | −5.601301000 | 3.218455000  | −0.996688000 |
| C | −3.655481000 | 3.528783000  | −0.120327000 |
| C | −2.946700000 | 3.692668000  | 1.084811000  |
| H | −3.348100000 | 3.283185000  | 2.022812000  |
| C | −1.732346000 | 4.404201000  | 1.151098000  |
| C | −1.217423000 | 5.010158000  | −0.027915000 |
| C | −1.902126000 | 4.800621000  | −1.240131000 |
| H | −1.515819000 | 5.239251000  | −2.170812000 |
| C | −3.095324000 | 4.055870000  | −1.313897000 |
| C | 0.040539000  | 5.874090000  | −0.011774000 |
| H | 0.027157000  | 6.539524000  | 0.874454000  |
| H | 0.013476000  | 6.533011000  | −0.900840000 |

|                            |              |              |              |
|----------------------------|--------------|--------------|--------------|
| H                          | −5.289680000 | −0.901694000 | 3.034028000  |
| H                          | −4.158081000 | 3.058467000  | −2.575427000 |
| H                          | −4.161231000 | −2.838153000 | 2.292446000  |
| H                          | −1.862064000 | −5.178351000 | −3.169045000 |
| H                          | −4.459574000 | 0.705339000  | −3.216000000 |
| H                          | −0.241883000 | 4.912481000  | 2.335337000  |
| H                          | −2.404455000 | −0.367976000 | 3.105102000  |
| H                          | −2.533378000 | −1.121586000 | 3.030039000  |
| H                          | 0.917408000  | 2.028885000  | 2.829873000  |
| H                          | 0.395913000  | 2.592651000  | 2.802586000  |
| H                          | 2.586824000  | 1.344158000  | −3.425864000 |
| H                          | 2.405878000  | 0.628734000  | −3.640730000 |
| H                          | 2.277856000  | −0.854793000 | 0.455176000  |
| H                          | 1.693847000  | −0.451984000 | 0.746780000  |
| H                          | −0.557106000 | −1.703574000 | −0.927072000 |
| H                          | −0.644361000 | −2.289638000 | −0.439396000 |
| <b>PPA-H<sub>2</sub>-6</b> |              |              |              |
| O                          | 1.365045000  | 5.364405000  | 2.404470000  |
| O                          | 3.576656000  | 3.314200000  | −2.285607000 |
| O                          | 4.727568000  | −1.489978000 | 2.483102000  |
| O                          | 5.621954000  | 1.483661000  | −2.146598000 |
| O                          | 3.789117000  | −4.092751000 | 2.453840000  |
| O                          | 1.315882000  | −4.411422000 | −2.543132000 |
| C                          | 1.953496000  | 4.821270000  | 1.261111000  |
| C                          | 1.288108000  | 5.018878000  | 0.030185000  |
| C                          | 1.875844000  | 4.471902000  | −1.121639000 |
| H                          | 1.389300000  | 4.597729000  | −2.098626000 |
| C                          | 3.100821000  | 3.769871000  | −1.087049000 |
| C                          | 3.784882000  | 3.617468000  | 0.149465000  |
| C                          | 3.178496000  | 4.139851000  | 1.312373000  |
| H                          | 3.699801000  | 4.035817000  | 2.278011000  |
| C                          | 5.155888000  | 2.953940000  | 0.242580000  |
| H                          | 5.807274000  | 3.333338000  | −0.570075000 |
| H                          | 5.626556000  | 3.272698000  | 1.192586000  |
| C                          | 5.148327000  | 1.429752000  | 0.200100000  |
| C                          | 5.387708000  | 0.727664000  | −1.000044000 |
| C                          | 5.409162000  | −0.677199000 | −1.027775000 |
| H                          | 5.610212000  | −1.198740000 | −1.976145000 |
| C                          | 5.187603000  | −1.439185000 | 0.133532000  |
| C                          | 4.928938000  | −0.736753000 | 1.333458000  |
| C                          | 4.912736000  | 0.666907000  | 1.361768000  |
| H                          | 4.720143000  | 1.189375000  | 2.312138000  |
| C                          | 5.195081000  | −2.959920000 | 0.090391000  |
| H                          | 5.755101000  | −3.275779000 | −0.811113000 |
| H                          | 5.752310000  | −3.353100000 | 0.963628000  |
| C                          | 3.811278000  | −3.606569000 | 0.045509000  |
| C                          | 3.119946000  | −3.700213000 | −1.177907000 |
| H                          | 3.545861000  | −3.255298000 | −2.088328000 |
| C                          | 1.889670000  | −4.376810000 | −1.296740000 |

|   |              |              |              |
|---|--------------|--------------|--------------|
| C | 1.341916000  | −5.025543000 | −0.155630000 |
| C | 2.005828000  | −4.881509000 | 1.077165000  |
| H | 1.592276000  | −5.350225000 | 1.980998000  |
| C | 3.212400000  | −4.167342000 | 1.203377000  |
| C | 0.073631000  | −5.871761000 | −0.236857000 |
| H | 0.059686000  | −6.428145000 | −1.194723000 |
| H | 0.116169000  | −6.629570000 | 0.568877000  |
| H | 5.622649000  | 0.895720000  | −2.926969000 |
| H | 4.288031000  | −3.244519000 | 2.510976000  |
| H | 4.393056000  | 2.766976000  | −2.186884000 |
| H | 1.891000000  | 5.117085000  | 3.188343000  |
| H | 4.367244000  | −0.927144000 | 3.194608000  |
| H | 0.378421000  | −4.720050000 | −2.499947000 |
| O | −1.396880000 | −4.900368000 | −2.475747000 |
| O | −3.392567000 | −3.869769000 | 2.629960000  |
| O | −5.522784000 | 1.338203000  | −2.102273000 |
| O | −4.678614000 | −1.422909000 | 2.667569000  |
| O | −3.619414000 | 3.352186000  | −2.299551000 |
| O | −1.402940000 | 5.124585000  | 2.509750000  |
| C | −1.931878000 | −4.614979000 | −1.216772000 |
| C | −1.227637000 | −5.091033000 | −0.087603000 |
| C | −1.755448000 | −4.798215000 | 1.180494000  |
| H | −1.229499000 | −5.131937000 | 2.085426000  |
| C | −2.957674000 | −4.077616000 | 1.349189000  |
| C | −3.688350000 | −3.657718000 | 0.204684000  |
| C | −3.141877000 | −3.921064000 | −1.069427000 |
| H | −3.694139000 | −3.601508000 | −1.967495000 |
| C | −5.062879000 | −3.003905000 | 0.327270000  |
| H | −5.544244000 | −3.356729000 | 1.260652000  |
| H | −5.691992000 | −3.362381000 | −0.510478000 |
| C | −5.067827000 | −1.480861000 | 0.303177000  |
| C | −4.866571000 | −0.723443000 | 1.479473000  |
| C | −4.892990000 | 0.680413000  | 1.451964000  |
| H | −4.740036000 | 1.246571000  | 2.384303000  |
| C | −5.117163000 | 1.389994000  | 0.256334000  |
| C | −5.296458000 | 0.634838000  | −0.923359000 |
| C | −5.276433000 | −0.770544000 | −0.894727000 |
| H | −5.446767000 | −1.332852000 | −1.826045000 |
| C | −5.151048000 | 2.913375000  | 0.241644000  |
| H | −5.639144000 | 3.258559000  | 1.172976000  |
| H | −5.791764000 | 3.254814000  | −0.595292000 |
| C | −3.780151000 | 3.578689000  | 0.152572000  |
| C | −3.148600000 | 4.034072000  | 1.325455000  |
| H | −3.633754000 | 3.891647000  | 2.302013000  |
| C | −1.908985000 | 4.704717000  | 1.307117000  |
| C | −1.287706000 | 4.966379000  | 0.055426000  |
| C | −1.895972000 | 4.470612000  | −1.113302000 |
| H | −1.430642000 | 4.648740000  | −2.093029000 |
| C | −3.117164000 | 3.768502000  | −1.089056000 |

|                            |              |              |              |
|----------------------------|--------------|--------------|--------------|
| C                          | −0.015948000 | 5.804087000  | −0.046117000 |
| H                          | −0.024499000 | 6.574984000  | 0.749850000  |
| H                          | −0.035550000 | 6.340736000  | −1.013567000 |
| H                          | −4.465523000 | −0.797591000 | 3.386516000  |
| H                          | −4.394547000 | 2.754737000  | −2.184340000 |
| H                          | −3.933506000 | −3.045167000 | 2.668870000  |
| H                          | −1.866673000 | −4.373878000 | −3.150204000 |
| H                          | −5.462969000 | 0.727469000  | −2.862034000 |
| H                          | −0.431986000 | 5.286350000  | 2.443978000  |
| H                          | −2.793708000 | 1.193617000  | −3.191878000 |
| H                          | −2.621997000 | 0.479812000  | −3.420433000 |
| H                          | −0.831629000 | 1.980821000  | 0.007827000  |
| H                          | −0.839681000 | 1.308385000  | 0.377702000  |
| H                          | 2.914171000  | 1.067925000  | −3.223039000 |
| H                          | 2.812672000  | 0.339683000  | −3.445121000 |
| H                          | 2.085205000  | −1.148702000 | −0.055886000 |
| H                          | 1.854017000  | −0.421636000 | 0.027174000  |
| H                          | 2.406751000  | −2.611260000 | 3.885102000  |
| H                          | 1.998408000  | −2.152473000 | 4.347713000  |
| H                          | −0.069762000 | −2.396007000 | −3.153352000 |
| H                          | −0.583297000 | −1.841672000 | −3.293026000 |
| <b>PPA-H<sub>2</sub>-7</b> |              |              |              |
| O                          | 1.309674000  | 4.636798000  | 2.763482000  |
| O                          | 3.686863000  | 4.098708000  | −2.253944000 |
| O                          | 5.750061000  | −1.434788000 | 2.302203000  |
| O                          | 4.585194000  | 1.510960000  | −2.285083000 |
| O                          | 3.911976000  | −3.531120000 | 2.592316000  |
| O                          | 1.175440000  | −4.921913000 | −2.073842000 |
| C                          | 1.941220000  | 4.484498000  | 1.529722000  |
| C                          | 1.322671000  | 5.077302000  | 0.404322000  |
| C                          | 1.944697000  | 4.908945000  | −0.844022000 |
| H                          | 1.492388000  | 5.341081000  | −1.746800000 |
| C                          | 3.155588000  | 4.199277000  | −0.990186000 |
| C                          | 3.799566000  | 3.661567000  | 0.155024000  |
| C                          | 3.158081000  | 3.800091000  | 1.404770000  |
| H                          | 3.635978000  | 3.377736000  | 2.303321000  |
| C                          | 5.173074000  | 2.999059000  | 0.072105000  |
| H                          | 5.703149000  | 3.383819000  | −0.821901000 |
| H                          | 5.766152000  | 3.318596000  | 0.951108000  |
| C                          | 5.159355000  | 1.476562000  | 0.040195000  |
| C                          | 4.849492000  | 0.766832000  | −1.141757000 |
| C                          | 4.850266000  | −0.637152000 | −1.163910000 |
| H                          | 4.611932000  | −1.166738000 | −2.099386000 |
| C                          | 5.159873000  | −1.393285000 | −0.016726000 |
| C                          | 5.449512000  | −0.684521000 | 1.169470000  |
| C                          | 5.452722000  | 0.720944000  | 1.191782000  |
| H                          | 5.704167000  | 1.247594000  | 2.126116000  |
| C                          | 5.165898000  | −2.916738000 | −0.054134000 |
| H                          | 5.570847000  | −3.239897000 | −1.032448000 |

|   |              |              |              |
|---|--------------|--------------|--------------|
| H | 5.862549000  | −3.295228000 | 0.719683000  |
| C | 3.796672000  | −3.564042000 | 0.130738000  |
| C | 3.038165000  | −3.929912000 | −0.997837000 |
| H | 3.422720000  | −3.726236000 | −2.007521000 |
| C | 1.803627000  | −4.600226000 | −0.894129000 |
| C | 1.306673000  | −4.936976000 | 0.394290000  |
| C | 2.045000000  | −4.533105000 | 1.522581000  |
| H | 1.679687000  | −4.774924000 | 2.530604000  |
| C | 3.270243000  | −3.842261000 | 1.421231000  |
| C | 0.026113000  | −5.748392000 | 0.578446000  |
| H | 0.008208000  | −6.578992000 | −0.155826000 |
| H | 0.059428000  | −6.214456000 | 1.581520000  |
| H | 4.214620000  | 0.938586000  | −2.984279000 |
| H | 4.621561000  | −2.863822000 | 2.445816000  |
| H | 4.171660000  | 3.240361000  | −2.319148000 |
| H | 1.764886000  | 4.089616000  | 3.431009000  |
| H | 5.850944000  | −0.841089000 | 3.070895000  |
| H | 0.270619000  | −5.290448000 | −1.926211000 |
| O | −1.477111000 | −5.641078000 | −1.829623000 |
| O | −3.441478000 | −2.941011000 | 2.638185000  |
| O | −4.568799000 | 1.345364000  | −2.399496000 |
| O | −5.633285000 | −1.258240000 | 2.414962000  |
| O | −3.433719000 | 3.918341000  | −2.411775000 |
| O | −1.471928000 | 4.552588000  | 2.775611000  |
| C | −2.006771000 | −4.936628000 | −0.746701000 |
| C | −1.275499000 | −4.960836000 | 0.461792000  |
| C | −1.800212000 | −4.252429000 | 1.555553000  |
| H | −1.255656000 | −4.239935000 | 2.510005000  |
| C | −3.029735000 | −3.560516000 | 1.489524000  |
| C | −3.775443000 | −3.574948000 | 0.279206000  |
| C | −3.230641000 | −4.255727000 | −0.830949000 |
| H | −3.801259000 | −4.286615000 | −1.772463000 |
| C | −5.143561000 | −2.910217000 | 0.160456000  |
| H | −5.782493000 | −3.213289000 | 1.013912000  |
| H | −5.636734000 | −3.298786000 | −0.751416000 |
| C | −5.118877000 | −1.387068000 | 0.082131000  |
| C | −5.384453000 | −0.592026000 | 1.216243000  |
| C | −5.395264000 | 0.810261000  | 1.134568000  |
| H | −5.617284000 | 1.405852000  | 2.033406000  |
| C | −5.123397000 | 1.478542000  | −0.072738000 |
| C | −4.828889000 | 0.682975000  | −1.205415000 |
| C | −4.832078000 | −0.719212000 | −1.125378000 |
| H | −4.608165000 | −1.315790000 | −2.023656000 |
| C | −5.107336000 | 2.997269000  | −0.145307000 |
| H | −5.756743000 | 3.388630000  | 0.661679000  |
| H | −5.548096000 | 3.330165000  | −1.104811000 |
| C | −3.720351000 | 3.617243000  | 0.008387000  |
| C | −3.159287000 | 3.787054000  | 1.288016000  |
| H | −3.687771000 | 3.416925000  | 2.178193000  |

|   |              |              |              |
|---|--------------|--------------|--------------|
| C | -1.926864000 | 4.440242000  | 1.487086000  |
| C | -1.248948000 | 4.994996000  | 0.367129000  |
| C | -1.781064000 | 4.772661000  | -0.917145000 |
| H | -1.264002000 | 5.165949000  | -1.803831000 |
| C | -2.986226000 | 4.072429000  | -1.119809000 |
| C | 0.011308000  | 5.841661000  | 0.534056000  |
| H | -0.021523000 | 6.353549000  | 1.515693000  |
| H | -0.000990000 | 6.634061000  | -0.239271000 |
| H | -5.697075000 | -0.606235000 | 3.139504000  |
| H | -3.930508000 | 3.070369000  | -2.472105000 |
| H | -4.294252000 | -2.457177000 | 2.528083000  |
| H | -2.014961000 | -5.473844000 | -2.628246000 |
| H | -4.277903000 | 0.702652000  | -3.074097000 |
| H | -0.493087000 | 4.678234000  | 2.778851000  |
| H | -2.543697000 | 0.196430000  | 2.817624000  |
| H | -2.670858000 | -0.557143000 | 2.894524000  |
| H | 0.139874000  | 2.084989000  | 1.179300000  |
| H | -0.024191000 | 1.956159000  | 1.917707000  |
| H | 2.465320000  | 2.857097000  | -4.017483000 |
| H | 2.214101000  | 2.362195000  | -4.549234000 |
| H | 2.123348000  | -1.136163000 | 0.794954000  |
| H | 1.913247000  | -0.437358000 | 1.032010000  |
| H | -0.096192000 | -2.967726000 | -2.691683000 |
| H | -0.568114000 | -2.363724000 | -2.747731000 |
| H | -2.529968000 | -4.786156000 | -4.640905000 |
| H | -2.135373000 | -4.286641000 | -4.212619000 |
| H | 1.608193000  | 0.907816000  | -1.199391000 |
| H | 1.839282000  | 1.538246000  | -1.568254000 |

## 2. Li<sup>+</sup>@PPA, inside the hollow

### Li<sup>+</sup>@PPA-H<sub>2</sub>-1

|   |             |              |              |
|---|-------------|--------------|--------------|
| O | 1.701042000 | 5.630620000  | 2.217748000  |
| O | 3.505220000 | 3.196356000  | -2.447643000 |
| O | 4.799054000 | -1.197167000 | 2.403737000  |
| O | 5.684384000 | 1.509680000  | -2.383276000 |
| O | 3.761863000 | -3.907700000 | 2.505944000  |
| O | 1.138058000 | -4.171899000 | -2.405167000 |
| C | 2.228356000 | 5.050084000  | 1.097324000  |
| C | 1.421274000 | 5.081731000  | -0.082779000 |
| C | 1.924096000 | 4.452075000  | -1.240429000 |
| H | 1.321826000 | 4.448172000  | -2.160005000 |
| C | 3.178552000 | 3.776774000  | -1.276950000 |
| C | 4.008207000 | 3.800722000  | -0.108052000 |
| C | 3.507782000 | 4.445246000  | 1.058110000  |
| H | 4.133779000 | 4.463987000  | 1.963183000  |
| C | 5.385953000 | 3.127549000  | -0.076708000 |
| H | 5.980464000 | 3.436504000  | -0.958543000 |
| H | 5.929506000 | 3.495393000  | 0.813566000  |
| C | 5.339884000 | 1.596822000  | -0.026763000 |

|   |              |              |              |
|---|--------------|--------------|--------------|
| C | 5.494847000  | 0.820246000  | -1.209963000 |
| C | 5.466964000  | -0.596649000 | -1.146116000 |
| H | 5.620228000  | -1.181760000 | -2.065381000 |
| C | 5.215964000  | -1.292316000 | 0.063128000  |
| C | 5.024771000  | -0.511305000 | 1.248181000  |
| C | 5.123034000  | 0.901675000  | 1.194591000  |
| H | 5.007297000  | 1.483546000  | 2.121324000  |
| C | 5.126663000  | -2.809168000 | 0.094727000  |
| H | 5.648991000  | -3.207632000 | -0.795760000 |
| H | 5.668461000  | -3.194493000 | 0.980592000  |
| C | 3.697247000  | -3.364645000 | 0.106874000  |
| C | 2.965317000  | -3.448447000 | -1.094041000 |
| H | 3.361827000  | -3.018659000 | -2.024709000 |
| C | 1.747695000  | -4.155813000 | -1.183682000 |
| C | 1.264023000  | -4.840346000 | -0.031176000 |
| C | 1.959011000  | -4.695109000 | 1.183332000  |
| H | 1.612358000  | -5.208740000 | 2.090696000  |
| C | 3.150666000  | -3.946905000 | 1.283983000  |
| C | 0.066388000  | -5.791285000 | -0.101002000 |
| H | 0.141691000  | -6.417224000 | -1.011325000 |
| H | 0.144445000  | -6.480121000 | 0.762745000  |
| H | 5.811786000  | 0.914867000  | -3.152944000 |
| H | 4.323247000  | -3.109711000 | 2.570736000  |
| H | 4.378003000  | 2.732950000  | -2.445443000 |
| H | 2.304774000  | 5.580190000  | 2.987363000  |
| H | 4.631853000  | -0.606480000 | 3.166765000  |
| H | 0.344518000  | -4.747333000 | -2.422768000 |
| O | -1.495831000 | -5.329014000 | -2.432497000 |
| O | -3.478905000 | -3.547273000 | 2.456074000  |
| O | -4.840925000 | 1.341603000  | -2.205146000 |
| O | -5.470789000 | -1.646648000 | 2.454717000  |
| O | -4.014948000 | 4.134529000  | -2.258316000 |
| O | -0.635789000 | 3.944659000  | 2.172415000  |
| C | -2.058803000 | -4.898485000 | -1.259806000 |
| C | -1.306457000 | -5.117557000 | -0.065583000 |
| C | -1.860050000 | -4.657599000 | 1.155938000  |
| H | -1.286066000 | -4.767083000 | 2.087682000  |
| C | -3.102574000 | -3.962975000 | 1.230206000  |
| C | -3.874413000 | -3.799589000 | 0.032682000  |
| C | -3.329665000 | -4.277427000 | -1.186078000 |
| H | -3.915889000 | -4.161241000 | -2.110828000 |
| C | -5.254637000 | -3.128613000 | 0.040989000  |
| H | -5.844010000 | -3.498535000 | 0.902712000  |
| H | -5.796457000 | -3.445131000 | -0.869824000 |
| C | -5.224741000 | -1.597595000 | 0.082820000  |
| C | -5.321312000 | -0.893238000 | 1.316197000  |
| C | -5.285775000 | 0.525309000  | 1.335937000  |
| H | -5.384385000 | 1.054918000  | 2.295774000  |
| C | -5.099813000 | 1.292447000  | 0.158799000  |

|                                           |              |              |              |
|-------------------------------------------|--------------|--------------|--------------|
| C                                         | -4.988618000 | 0.585490000  | -1.081023000 |
| C                                         | -5.080710000 | -0.828904000 | -1.104389000 |
| H                                         | -5.020393000 | -1.354063000 | -2.069764000 |
| C                                         | -5.002616000 | 2.807897000  | 0.209982000  |
| H                                         | -5.400944000 | 3.150834000  | 1.183837000  |
| H                                         | -5.656489000 | 3.247364000  | -0.569012000 |
| C                                         | -3.586858000 | 3.370016000  | 0.036762000  |
| C                                         | -2.676685000 | 3.345862000  | 1.113827000  |
| H                                         | -2.923885000 | 2.820493000  | 2.047074000  |
| C                                         | -1.462643000 | 4.056601000  | 1.076020000  |
| C                                         | -1.150526000 | 4.847212000  | -0.065420000 |
| C                                         | -2.027445000 | 4.818476000  | -1.163485000 |
| H                                         | -1.815787000 | 5.409216000  | -2.065467000 |
| C                                         | -3.225064000 | 4.071090000  | -1.146092000 |
| C                                         | 0.063406000  | 5.777924000  | -0.096317000 |
| H                                         | 0.014264000  | 6.488597000  | 0.752285000  |
| H                                         | -0.005314000 | 6.386698000  | -1.017467000 |
| H                                         | -5.549923000 | -1.095192000 | 3.261950000  |
| H                                         | -4.558728000 | 3.324244000  | -2.321052000 |
| H                                         | -4.299321000 | -2.997265000 | 2.458753000  |
| H                                         | -2.071180000 | -5.164346000 | -3.207392000 |
| H                                         | -4.726456000 | 0.798804000  | -3.012076000 |
| H                                         | -0.056399000 | 4.730002000  | 2.275707000  |
| Li                                        | -7.071216000 | -0.040746000 | -0.083498000 |
| Li                                        | 3.459150000  | 6.085548000  | -0.635160000 |
| Li                                        | 7.168252000  | 0.061298000  | 0.329100000  |
| Li                                        | -3.028795000 | -6.577941000 | 0.591696000  |
| H                                         | 1.624435000  | 1.813195000  | 1.433335000  |
| H                                         | 1.067391000  | 2.275476000  | 1.695354000  |
| <b>Li<sup>+</sup>@PPA-H<sub>2</sub>-2</b> |              |              |              |
| O                                         | 1.676370000  | 5.581156000  | 2.239020000  |
| O                                         | 3.511576000  | 3.249960000  | -2.466233000 |
| O                                         | 4.814720000  | -1.213162000 | 2.357048000  |
| O                                         | 5.664444000  | 1.539348000  | -2.410516000 |
| O                                         | 3.801420000  | -3.928920000 | 2.450971000  |
| O                                         | 1.088000000  | -4.137492000 | -2.414314000 |
| C                                         | 2.212155000  | 5.028540000  | 1.108742000  |
| C                                         | 1.413722000  | 5.087844000  | -0.075968000 |
| C                                         | 1.925271000  | 4.485084000  | -1.244146000 |
| H                                         | 1.329980000  | 4.501682000  | -2.168195000 |
| C                                         | 3.178581000  | 3.807544000  | -1.286509000 |
| C                                         | 4.001273000  | 3.807311000  | -0.112515000 |
| C                                         | 3.492026000  | 4.425399000  | 1.064428000  |
| H                                         | 4.111132000  | 4.422977000  | 1.974383000  |
| C                                         | 5.379517000  | 3.134925000  | -0.085997000 |
| H                                         | 5.974391000  | 3.453526000  | -0.964157000 |
| H                                         | 5.921621000  | 3.494554000  | 0.808491000  |
| C                                         | 5.335052000  | 1.603940000  | -0.050932000 |
| C                                         | 5.481327000  | 0.839022000  | -1.242823000 |



|   |              |              |              |
|---|--------------|--------------|--------------|
| C | 5.453147000  | −0.578474000 | −1.192366000 |
| H | 5.598850000  | −1.154971000 | −2.118315000 |
| C | 5.211788000  | −1.285789000 | 0.012074000  |
| C | 5.030526000  | −0.516380000 | 1.206258000  |
| C | 5.127792000  | 0.897062000  | 1.165286000  |
| H | 5.019778000  | 1.469819000  | 2.098649000  |
| C | 5.122585000  | −2.802828000 | 0.030319000  |
| H | 5.631404000  | −3.192859000 | −0.871680000 |
| H | 5.677871000  | −3.196617000 | 0.904043000  |
| C | 3.693615000  | −3.358622000 | 0.060021000  |
| C | 2.940967000  | −3.429485000 | −1.129005000 |
| H | 3.321382000  | −2.989689000 | −2.061696000 |
| C | 1.722285000  | −4.136344000 | −1.204691000 |
| C | 1.258015000  | −4.831750000 | −0.050886000 |
| C | 1.974432000  | −4.700809000 | 1.152527000  |
| H | 1.642432000  | −5.223110000 | 2.060405000  |
| C | 3.168181000  | −3.954310000 | 1.239983000  |
| C | 0.054757000  | −5.775618000 | −0.108286000 |
| H | 0.125731000  | −6.416016000 | −1.008945000 |
| H | 0.127102000  | −6.452048000 | 0.765718000  |
| H | 5.786654000  | 0.952209000  | −3.186860000 |
| H | 4.359530000  | −3.128695000 | 2.516289000  |
| H | 4.378215000  | 2.774975000  | −2.463357000 |
| H | 2.273248000  | 5.510117000  | 3.012275000  |
| H | 4.655144000  | −0.630025000 | 3.127471000  |
| H | 0.317238000  | −4.742863000 | −2.435141000 |
| O | −1.517108000 | −5.366206000 | −2.442964000 |
| O | −3.456422000 | −3.430485000 | 2.404091000  |
| O | −4.832936000 | 1.353478000  | −2.294254000 |
| O | −5.498682000 | −1.591387000 | 2.386550000  |
| O | −3.962497000 | 4.133390000  | −2.348582000 |
| O | −0.712857000 | 3.965788000  | 2.179155000  |
| C | −2.072529000 | −4.903227000 | −1.279624000 |
| C | −1.313363000 | −5.091643000 | −0.084381000 |
| C | −1.856095000 | −4.592361000 | 1.126274000  |
| H | −1.275711000 | −4.676810000 | 2.056647000  |
| C | −3.095963000 | −3.893316000 | 1.187933000  |
| C | −3.877963000 | −3.764507000 | −0.006489000 |
| C | −3.342515000 | −4.278991000 | −1.214777000 |
| H | −3.935065000 | −4.188429000 | −2.138374000 |
| C | −5.259973000 | −3.096375000 | −0.009461000 |
| H | −5.852531000 | −3.459470000 | 0.852989000  |
| H | −5.796879000 | −3.424835000 | −0.918916000 |
| C | −5.237760000 | −1.565067000 | 0.016385000  |
| C | −5.351102000 | −0.849006000 | 1.240618000  |
| C | −5.323565000 | 0.569087000  | 1.247512000  |
| H | −5.433930000 | 1.106696000  | 2.201265000  |
| C | −5.125705000 | 1.324710000  | 0.065710000  |
| C | −4.995449000 | 0.606742000  | −1.165882000 |

|                                           |              |              |              |
|-------------------------------------------|--------------|--------------|--------------|
| C                                         | −5.083413000 | −0.807880000 | −1.177117000 |
| H                                         | −5.007870000 | −1.342314000 | −2.136259000 |
| C                                         | −5.027976000 | 2.839831000  | 0.105418000  |
| H                                         | −5.450480000 | 3.192867000  | 1.065398000  |
| H                                         | −5.658738000 | 3.274324000  | −0.694805000 |
| C                                         | −3.604844000 | 3.392165000  | −0.033864000 |
| C                                         | −2.724806000 | 3.370651000  | 1.068004000  |
| H                                         | −3.003208000 | 2.856312000  | 1.998765000  |
| C                                         | −1.504766000 | 4.073278000  | 1.058295000  |
| C                                         | −1.159029000 | 4.855082000  | −0.079689000 |
| C                                         | −2.004403000 | 4.819897000  | −1.202409000 |
| H                                         | −1.765337000 | 5.403440000  | −2.102191000 |
| C                                         | −3.205339000 | 4.077861000  | −1.213447000 |
| C                                         | 0.056158000  | 5.784828000  | −0.083850000 |
| H                                         | 0.001936000  | 6.479215000  | 0.777666000  |
| H                                         | −0.005725000 | 6.411484000  | −0.993530000 |
| H                                         | −5.572078000 | −1.030651000 | 3.187931000  |
| H                                         | −4.512412000 | 3.327547000  | −2.416333000 |
| H                                         | −4.292133000 | −2.902703000 | 2.401666000  |
| H                                         | −2.095104000 | −5.218944000 | −3.219487000 |
| H                                         | −4.708967000 | 0.804035000  | −3.095260000 |
| H                                         | −0.102886000 | 4.728532000  | 2.273872000  |
| Li                                        | −7.088195000 | −0.021922000 | −0.179044000 |
| Li                                        | 3.458124000  | 6.102281000  | −0.590175000 |
| Li                                        | 7.168454000  | 0.066677000  | 0.278705000  |
| Li                                        | −3.039479000 | −6.526179000 | 0.611468000  |
| H                                         | 1.602375000  | 1.872801000  | 1.578508000  |
| H                                         | 1.011427000  | 2.301546000  | 1.822473000  |
| H                                         | −2.396798000 | −0.241872000 | 2.249760000  |
| H                                         | −2.517055000 | −0.950006000 | 2.517716000  |
| <b>Li<sup>+</sup>@PPA-H<sub>2</sub>-3</b> |              |              |              |
| O                                         | 1.689828000  | 5.560576000  | 2.236599000  |
| O                                         | 3.481005000  | 3.214804000  | −2.478085000 |
| O                                         | 4.846759000  | −1.220375000 | 2.364294000  |
| O                                         | 5.633642000  | 1.496475000  | −2.432161000 |
| O                                         | 3.767645000  | −3.899843000 | 2.468572000  |
| O                                         | 1.150850000  | −4.198191000 | −2.444189000 |
| C                                         | 2.216247000  | 5.006503000  | 1.102991000  |
| C                                         | 1.410898000  | 5.069728000  | −0.076702000 |
| C                                         | 1.910606000  | 4.461966000  | −1.247395000 |
| H                                         | 1.308488000  | 4.480316000  | −2.166981000 |
| C                                         | 3.159918000  | 3.777706000  | −1.297677000 |
| C                                         | 3.992653000  | 3.778957000  | −0.130777000 |
| C                                         | 3.494142000  | 4.399702000  | 1.049528000  |
| H                                         | 4.120741000  | 4.397151000  | 1.954355000  |
| C                                         | 5.372423000  | 3.109037000  | −0.116106000 |
| H                                         | 5.955757000  | 3.423538000  | −1.003517000 |
| H                                         | 5.924258000  | 3.476527000  | 0.769202000  |
| C                                         | 5.335181000  | 1.578236000  | −0.069288000 |

|   |              |              |              |
|---|--------------|--------------|--------------|
| C | 5.470406000  | 0.804314000  | -1.256583000 |
| C | 5.453985000  | -0.612875000 | -1.194274000 |
| H | 5.593998000  | -1.195611000 | -2.117134000 |
| C | 5.230929000  | -1.311191000 | 0.018195000  |
| C | 5.056657000  | -0.533029000 | 1.206730000  |
| C | 5.148295000  | 0.879994000  | 1.154524000  |
| H | 5.046125000  | 1.459422000  | 2.084412000  |
| C | 5.143233000  | -2.828971000 | 0.047594000  |
| H | 5.663138000  | -3.225483000 | -0.845138000 |
| H | 5.689207000  | -3.215119000 | 0.930441000  |
| C | 3.713788000  | -3.383940000 | 0.062391000  |
| C | 2.984547000  | -3.477997000 | -1.139086000 |
| H | 3.388402000  | -3.065807000 | -2.074512000 |
| C | 1.758958000  | -4.172057000 | -1.222077000 |
| C | 1.264695000  | -4.833924000 | -0.061057000 |
| C | 1.959052000  | -4.680860000 | 1.152390000  |
| H | 1.606126000  | -5.179503000 | 2.065667000  |
| C | 3.159455000  | -3.945228000 | 1.245814000  |
| C | 0.057174000  | -5.772428000 | -0.119972000 |
| H | 0.127099000  | -6.411700000 | -1.021477000 |
| H | 0.127450000  | -6.450026000 | 0.753408000  |
| H | 5.752865000  | 0.904189000  | -3.205031000 |
| H | 4.347693000  | -3.114584000 | 2.522968000  |
| H | 4.344885000  | 2.734735000  | -2.480063000 |
| H | 2.290165000  | 5.484606000  | 3.006673000  |
| H | 4.700952000  | -0.631263000 | 3.132885000  |
| H | 0.351203000  | -4.765186000 | -2.454962000 |
| O | -1.501857000 | -5.334569000 | -2.457629000 |
| O | -3.465365000 | -3.451329000 | 2.400296000  |
| O | -4.853697000 | 1.357125000  | -2.296265000 |
| O | -5.491665000 | -1.596399000 | 2.382774000  |
| O | -3.955163000 | 4.123138000  | -2.347971000 |
| O | -0.735684000 | 3.985129000  | 2.202279000  |
| C | -2.062909000 | -4.884409000 | -1.291858000 |
| C | -1.309778000 | -5.086103000 | -0.095214000 |
| C | -1.858222000 | -4.599036000 | 1.118101000  |
| H | -1.282135000 | -4.692172000 | 2.050332000  |
| C | -3.098463000 | -3.900764000 | 1.180929000  |
| C | -3.875304000 | -3.761035000 | -0.015384000 |
| C | -3.333747000 | -4.262280000 | -1.226296000 |
| H | -3.922534000 | -4.163719000 | -2.151462000 |
| C | -5.259003000 | -3.096477000 | -0.017201000 |
| H | -5.850388000 | -3.463250000 | 0.844497000  |
| H | -5.794923000 | -3.424797000 | -0.927295000 |
| C | -5.241099000 | -1.565334000 | 0.011628000  |
| C | -5.350398000 | -0.851745000 | 1.237705000  |
| C | -5.324433000 | 0.566352000  | 1.246943000  |
| H | -5.427977000 | 1.101718000  | 2.202710000  |
| C | -5.133055000 | 1.324821000  | 0.065821000  |

|                                           |              |              |              |
|-------------------------------------------|--------------|--------------|--------------|
| C                                         | −5.008763000 | 0.608981000  | −1.167656000 |
| C                                         | −5.094052000 | −0.805741000 | −1.181083000 |
| H                                         | −5.023178000 | −1.338144000 | −2.141710000 |
| C                                         | −5.034736000 | 2.840224000  | 0.108366000  |
| H                                         | −5.459080000 | 3.191662000  | 1.068062000  |
| H                                         | −5.663911000 | 3.276304000  | −0.692293000 |
| C                                         | −3.610981000 | 3.392720000  | −0.026789000 |
| C                                         | −2.738035000 | 3.380292000  | 1.080926000  |
| H                                         | −3.022778000 | 2.874938000  | 2.014591000  |
| C                                         | −1.516990000 | 4.081420000  | 1.073609000  |
| C                                         | −1.162143000 | 4.851360000  | −0.069602000 |
| C                                         | −2.001397000 | 4.809264000  | −1.196524000 |
| H                                         | −1.756119000 | 5.385791000  | −2.099122000 |
| C                                         | −3.204492000 | 4.070723000  | −1.208642000 |
| C                                         | 0.057397000  | 5.774987000  | −0.076126000 |
| H                                         | 0.011120000  | 6.467245000  | 0.787461000  |
| H                                         | −0.005000000 | 6.404551000  | −0.983811000 |
| H                                         | −5.564735000 | −1.037424000 | 3.185388000  |
| H                                         | −4.514896000 | 3.323782000  | −2.410996000 |
| H                                         | −4.298070000 | −2.918799000 | 2.397906000  |
| H                                         | −2.077795000 | −5.182224000 | −3.234659000 |
| H                                         | −4.732140000 | 0.808846000  | −3.098418000 |
| H                                         | −0.110461000 | 4.736856000  | 2.283578000  |
| Li                                        | −7.095637000 | −0.022072000 | −0.178699000 |
| Li                                        | 3.455428000  | 6.074048000  | −0.604476000 |
| Li                                        | 7.181735000  | 0.051159000  | 0.251864000  |
| Li                                        | −3.023513000 | −6.536787000 | 0.598279000  |
| H                                         | 1.581826000  | 1.921550000  | 1.615663000  |
| H                                         | 0.980839000  | 2.320561000  | 1.882920000  |
| H                                         | −2.392997000 | −0.264635000 | 2.214466000  |
| H                                         | −2.514204000 | −0.970831000 | 2.486405000  |
| H                                         | 2.152819000  | −0.345240000 | −0.402032000 |
| H                                         | 2.139547000  | −0.346018000 | 0.363541000  |
| <b>Li<sup>+</sup>@PPA-H<sub>2</sub>-4</b> |              |              |              |
| O                                         | 1.673026000  | 5.570345000  | 2.291423000  |
| O                                         | 3.497769000  | 3.156966000  | −2.375758000 |
| O                                         | 4.808284000  | −1.254079000 | 2.444289000  |
| O                                         | 5.692090000  | 1.497845000  | −2.315175000 |
| O                                         | 3.845478000  | −4.003121000 | 2.536025000  |
| O                                         | 1.029561000  | −4.059854000 | −2.275224000 |
| C                                         | 2.208348000  | 5.001118000  | 1.169801000  |
| C                                         | 1.411202000  | 5.047216000  | −0.016452000 |
| C                                         | 1.920138000  | 4.422748000  | −1.174221000 |
| H                                         | 1.324871000  | 4.425699000  | −2.098390000 |
| C                                         | 3.171821000  | 3.743035000  | −1.205090000 |
| C                                         | 3.996624000  | 3.760167000  | −0.033518000 |
| C                                         | 3.488193000  | 4.396783000  | 1.134096000  |
| H                                         | 4.107631000  | 4.407982000  | 2.043747000  |
| C                                         | 5.378828000  | 3.095313000  | 0.002364000  |

|   |              |              |              |
|---|--------------|--------------|--------------|
| H | 5.976985000  | 3.416002000  | −0.872828000 |
| H | 5.913103000  | 3.462058000  | 0.898656000  |
| C | 5.347225000  | 1.564380000  | 0.041499000  |
| C | 5.513529000  | 0.798830000  | −1.146208000 |
| C | 5.491955000  | −0.617679000 | −1.095313000 |
| H | 5.645004000  | −1.193741000 | −2.020021000 |
| C | 5.235407000  | −1.323718000 | 0.105409000  |
| C | 5.037269000  | −0.555202000 | 1.297356000  |
| C | 5.129572000  | 0.858316000  | 1.256503000  |
| H | 5.006390000  | 1.431833000  | 2.187478000  |
| C | 5.135581000  | −2.839025000 | 0.120856000  |
| H | 5.632976000  | −3.232106000 | −0.786240000 |
| H | 5.694558000  | −3.241285000 | 0.988233000  |
| C | 3.701210000  | −3.379030000 | 0.162441000  |
| C | 2.923279000  | −3.411196000 | −1.012809000 |
| H | 3.288169000  | −2.949785000 | −1.941256000 |
| C | 1.699972000  | −4.108250000 | −1.079895000 |
| C | 1.253617000  | −4.835730000 | 0.059606000  |
| C | 1.994700000  | −4.741270000 | 1.251326000  |
| H | 1.676736000  | −5.284699000 | 2.151815000  |
| C | 3.192770000  | −4.000646000 | 1.335821000  |
| C | 0.047463000  | −5.776605000 | 0.001640000  |
| H | 0.120545000  | −6.422126000 | −0.895381000 |
| H | 0.119144000  | −6.450236000 | 0.877774000  |
| H | 5.817955000  | 0.909192000  | −3.089805000 |
| H | 4.400908000  | −3.201705000 | 2.610974000  |
| H | 4.373501000  | 2.697669000  | −2.373621000 |
| H | 2.268875000  | 5.509148000  | 3.066354000  |
| H | 4.633415000  | −0.672140000 | 3.212262000  |
| H | 0.304881000  | −4.719510000 | −2.326382000 |
| O | −1.520551000 | −5.381444000 | −2.337543000 |
| O | −3.471451000 | −3.421892000 | 2.494087000  |
| O | −4.812548000 | 1.313650000  | −2.234114000 |
| O | −5.527027000 | −1.596263000 | 2.461355000  |
| O | −3.959259000 | 4.099788000  | −2.302474000 |
| O | −0.722815000 | 3.952593000  | 2.235353000  |
| C | −2.082984000 | −4.923729000 | −1.175690000 |
| C | −1.323039000 | −5.097581000 | 0.020017000  |
| C | −1.866640000 | −4.590052000 | 1.226930000  |
| H | −1.284492000 | −4.662577000 | 2.157258000  |
| C | −3.109725000 | −3.896828000 | 1.282730000  |
| C | −3.893185000 | −3.784492000 | 0.087544000  |
| C | −3.356947000 | −4.308264000 | −1.115578000 |
| H | −3.948103000 | −4.225298000 | −2.040586000 |
| C | −5.274920000 | −3.117142000 | 0.077770000  |
| H | −5.869821000 | −3.473496000 | 0.941336000  |
| H | −5.810099000 | −3.450978000 | −0.830713000 |
| C | −5.248931000 | −1.586010000 | 0.093224000  |
| C | −5.372168000 | −0.861495000 | 1.311508000  |

|                                           |              |              |              |
|-------------------------------------------|--------------|--------------|--------------|
| C                                         | −5.343651000 | 0.556433000  | 1.307998000  |
| H                                         | −5.460529000 | 1.101072000  | 2.256936000  |
| C                                         | −5.132821000 | 1.303171000  | 0.122872000  |
| C                                         | −4.989062000 | 0.576005000  | −1.101958000 |
| C                                         | −5.078851000 | −0.838356000 | −1.104055000 |
| H                                         | −4.993669000 | −1.380041000 | −2.058233000 |
| C                                         | −5.033331000 | 2.818538000  | 0.153076000  |
| H                                         | −5.460158000 | 3.178237000  | 1.108632000  |
| H                                         | −5.659539000 | 3.248825000  | −0.653057000 |
| C                                         | −3.609074000 | 3.368766000  | 0.016696000  |
| C                                         | −2.733206000 | 3.353639000  | 1.122064000  |
| H                                         | −3.014366000 | 2.845348000  | 2.055245000  |
| C                                         | −1.512394000 | 4.054698000  | 1.111980000  |
| C                                         | −1.161346000 | 4.828137000  | −0.029852000 |
| C                                         | −2.003289000 | 4.788452000  | −1.154821000 |
| H                                         | −1.759994000 | 5.366254000  | −2.057122000 |
| C                                         | −3.205358000 | 4.048433000  | −1.165008000 |
| C                                         | 0.057816000  | 5.751964000  | −0.036208000 |
| H                                         | 0.003845000  | 6.453619000  | 0.819345000  |
| H                                         | 0.003340000  | 6.371307000  | −0.951388000 |
| H                                         | −5.615526000 | −1.030563000 | 3.257680000  |
| H                                         | −4.506696000 | 3.292250000  | −2.369959000 |
| H                                         | −4.312872000 | −2.903361000 | 2.488602000  |
| H                                         | −2.097714000 | −5.235833000 | −3.115020000 |
| H                                         | −4.672472000 | 0.757917000  | −3.028118000 |
| H                                         | −0.116073000 | 4.717878000  | 2.329727000  |
| Li                                        | −7.092013000 | −0.047846000 | −0.138694000 |
| Li                                        | 3.456496000  | 6.049843000  | −0.545293000 |
| Li                                        | 7.185626000  | 0.037049000  | 0.389110000  |
| Li                                        | −3.045084000 | −6.530103000 | 0.738393000  |
| H                                         | 1.554461000  | 1.831177000  | 1.602028000  |
| H                                         | 0.967939000  | 2.271080000  | 1.836401000  |
| H                                         | −2.370998000 | −0.248346000 | 2.253280000  |
| H                                         | −2.537575000 | −0.950976000 | 2.509637000  |
| H                                         | 2.572382000  | 0.659594000  | −2.113694000 |
| H                                         | 2.532213000  | −0.064525000 | −1.864325000 |
| H                                         | −0.683427000 | −2.349645000 | −2.138659000 |
| H                                         | −1.191433000 | −1.816838000 | −1.916105000 |
| <b>Li<sup>+</sup>@PPA-H<sub>2</sub>-5</b> |              |              |              |
| O                                         | 1.683793000  | 5.574124000  | 2.287126000  |
| O                                         | 3.502346000  | 3.174015000  | −2.389190000 |
| O                                         | 4.793035000  | −1.233686000 | 2.438023000  |
| O                                         | 5.686745000  | 1.501645000  | −2.328894000 |
| O                                         | 3.824073000  | −3.972715000 | 2.539024000  |
| O                                         | 1.033316000  | −4.099815000 | −2.285377000 |
| C                                         | 2.218110000  | 5.009830000  | 1.162587000  |
| C                                         | 1.418517000  | 5.057581000  | −0.021851000 |
| C                                         | 1.925918000  | 4.437305000  | −1.182742000 |
| H                                         | 1.328363000  | 4.441027000  | −2.105428000 |

|   |              |              |              |
|---|--------------|--------------|--------------|
| C | 3.178107000  | 3.758971000  | −1.217543000 |
| C | 4.005002000  | 3.774036000  | −0.047328000 |
| C | 3.498455000  | 4.407170000  | 1.122714000  |
| H | 4.119453000  | 4.416270000  | 2.031312000  |
| C | 5.385180000  | 3.105655000  | −0.014206000 |
| H | 5.982412000  | 3.422291000  | −0.891427000 |
| H | 5.922791000  | 3.471763000  | 0.880353000  |
| C | 5.346080000  | 1.575107000  | 0.028020000  |
| C | 5.506317000  | 0.806132000  | −1.158386000 |
| C | 5.478505000  | −0.610361000 | −1.103885000 |
| H | 5.629765000  | −1.189471000 | −2.026976000 |
| C | 5.220004000  | −1.312096000 | 0.099009000  |
| C | 5.024972000  | −0.539486000 | 1.288779000  |
| C | 5.124423000  | 0.873338000  | 1.244670000  |
| H | 5.004825000  | 1.449626000  | 2.174407000  |
| C | 5.119258000  | −2.827596000 | 0.118786000  |
| H | 5.619294000  | −3.222363000 | −0.786128000 |
| H | 5.676754000  | −3.226769000 | 0.988623000  |
| C | 3.686637000  | −3.371903000 | 0.159046000  |
| C | 2.914790000  | −3.421431000 | −1.019663000 |
| H | 3.282767000  | −2.969865000 | −1.951745000 |
| C | 1.696464000  | −4.127249000 | −1.085069000 |
| C | 1.248389000  | −4.844135000 | 0.060344000  |
| C | 1.982391000  | −4.732071000 | 1.254615000  |
| H | 1.663478000  | −5.267596000 | 2.159461000  |
| C | 3.176102000  | −3.984217000 | 1.336467000  |
| C | 0.046178000  | −5.790015000 | 0.006919000  |
| H | 0.121342000  | −6.440518000 | −0.886281000 |
| H | 0.118722000  | −6.458131000 | 0.887155000  |
| H | 5.808221000  | 0.910743000  | −3.102493000 |
| H | 4.375669000  | −3.168206000 | 2.609497000  |
| H | 4.377835000  | 2.714512000  | −2.388532000 |
| H | 2.280490000  | 5.509057000  | 3.061094000  |
| H | 4.621216000  | −0.648735000 | 3.204393000  |
| H | 0.308550000  | −4.759969000 | −2.329996000 |
| O | −1.520290000 | −5.407282000 | −2.335846000 |
| O | −3.473594000 | −3.424538000 | 2.485971000  |
| O | −4.791335000 | 1.315793000  | −2.233395000 |
| O | −5.534769000 | −1.605882000 | 2.450300000  |
| O | −3.958249000 | 4.107210000  | −2.295998000 |
| O | −0.700150000 | 3.941260000  | 2.225751000  |
| C | −2.081613000 | −4.939740000 | −1.177069000 |
| C | −1.324470000 | −5.111557000 | 0.020564000  |
| C | −1.869051000 | −4.598953000 | 1.224965000  |
| H | −1.288821000 | −4.670455000 | 2.156529000  |
| C | −3.110099000 | −3.902091000 | 1.276340000  |
| C | −3.890170000 | −3.790124000 | 0.078844000  |
| C | −3.353081000 | −4.318772000 | −1.121705000 |
| H | −3.942285000 | −4.237008000 | −2.048038000 |

|                                           |              |              |              |
|-------------------------------------------|--------------|--------------|--------------|
| C                                         | −5.270846000 | −3.120521000 | 0.064483000  |
| H                                         | −5.869855000 | −3.478284000 | 0.924645000  |
| H                                         | −5.802595000 | −3.451659000 | −0.846986000 |
| C                                         | −5.243045000 | −1.589576000 | 0.083914000  |
| C                                         | −5.372570000 | −0.868311000 | 1.303339000  |
| C                                         | −5.340563000 | 0.549517000  | 1.303992000  |
| H                                         | −5.462080000 | 1.092081000  | 2.253539000  |
| C                                         | −5.121873000 | 1.299108000  | 0.122144000  |
| C                                         | −4.973892000 | 0.575186000  | −1.104151000 |
| C                                         | −5.066273000 | −0.838898000 | −1.110504000 |
| H                                         | −4.976903000 | −1.378451000 | −2.065518000 |
| C                                         | −5.019859000 | 2.813966000  | 0.156993000  |
| H                                         | −5.443312000 | 3.171484000  | 1.114897000  |
| H                                         | −5.648414000 | 3.247769000  | −0.645520000 |
| C                                         | −3.595873000 | 3.364039000  | 0.017203000  |
| C                                         | −2.714163000 | 3.342803000  | 1.117784000  |
| H                                         | −2.989099000 | 2.827583000  | 2.049020000  |
| C                                         | −1.495107000 | 4.047124000  | 1.106313000  |
| C                                         | −1.152308000 | 4.829872000  | −0.031464000 |
| C                                         | −1.999043000 | 4.794908000  | −1.153020000 |
| H                                         | −1.761810000 | 5.378962000  | −2.052932000 |
| C                                         | −3.198901000 | 4.051599000  | −1.162318000 |
| C                                         | 0.063298000  | 5.758228000  | −0.037110000 |
| H                                         | 0.008223000  | 6.457131000  | 0.820681000  |
| H                                         | 0.005144000  | 6.380370000  | −0.950165000 |
| H                                         | −5.626647000 | −1.042071000 | 3.247578000  |
| H                                         | −4.501047000 | 3.296813000  | −2.366697000 |
| H                                         | −4.316349000 | −2.908318000 | 2.478762000  |
| H                                         | −2.093818000 | −5.258145000 | −3.115333000 |
| H                                         | −4.647202000 | 0.761906000  | −3.027954000 |
| H                                         | −0.100380000 | 4.711444000  | 2.324978000  |
| Li                                        | −7.081943000 | −0.049135000 | −0.153398000 |
| Li                                        | 3.461233000  | 6.063729000  | −0.552815000 |
| Li                                        | 7.174689000  | 0.040302000  | 0.376979000  |
| Li                                        | −3.044290000 | −6.542316000 | 0.733949000  |
| H                                         | 1.676888000  | 1.857349000  | 1.839071000  |
| H                                         | 1.070415000  | 2.298851000  | 2.010758000  |
| H                                         | −2.415186000 | −0.226070000 | 2.249255000  |
| H                                         | −2.555113000 | −0.918803000 | 2.545399000  |
| H                                         | 2.593532000  | 0.676004000  | −2.208724000 |
| H                                         | 2.550173000  | −0.053866000 | −1.977879000 |
| H                                         | −0.665643000 | −2.407474000 | −2.265951000 |
| H                                         | −1.211567000 | −1.883047000 | −2.128746000 |
| H                                         | 0.235122000  | −0.532316000 | −0.077379000 |
| H                                         | 0.078333000  | −0.318124000 | 0.641625000  |
| <b>Li<sup>+</sup>@PPA-H<sub>2</sub>-6</b> |              |              |              |
| O                                         | 1.714167000  | 5.527211000  | 2.295621000  |
| O                                         | 3.515087000  | 3.112790000  | −2.380024000 |
| O                                         | 4.839343000  | −1.303027000 | 2.427196000  |



|   |              |              |              |
|---|--------------|--------------|--------------|
| O | 5.710313000  | 1.454249000  | -2.331101000 |
| O | 3.888353000  | -4.054980000 | 2.514521000  |
| O | 1.096055000  | -4.113130000 | -2.309738000 |
| C | 2.244888000  | 4.959790000  | 1.170846000  |
| C | 1.443372000  | 5.009168000  | -0.012233000 |
| C | 1.944985000  | 4.383059000  | -1.172560000 |
| H | 1.345281000  | 4.387152000  | -2.093848000 |
| C | 3.194708000  | 3.699893000  | -1.208552000 |
| C | 4.024734000  | 3.715914000  | -0.040547000 |
| C | 3.522814000  | 4.352159000  | 1.129807000  |
| H | 4.145637000  | 4.360190000  | 2.037143000  |
| C | 5.405594000  | 3.048454000  | -0.011111000 |
| H | 6.000895000  | 3.369233000  | -0.888193000 |
| H | 5.943704000  | 3.413343000  | 0.883690000  |
| C | 5.372502000  | 1.517614000  | 0.026598000  |
| C | 5.537835000  | 0.753425000  | -1.162206000 |
| C | 5.524280000  | -0.663145000 | -1.111644000 |
| H | 5.680266000  | -1.238239000 | -2.036440000 |
| C | 5.274053000  | -1.370364000 | 0.089620000  |
| C | 5.069104000  | -0.603241000 | 1.281194000  |
| C | 5.156653000  | 0.810534000  | 1.241089000  |
| H | 5.032045000  | 1.382962000  | 2.172577000  |
| C | 5.186158000  | -2.886325000 | 0.105514000  |
| H | 5.690138000  | -3.276305000 | -0.799293000 |
| H | 5.743261000  | -3.284549000 | 0.975832000  |
| C | 3.754743000  | -3.432584000 | 0.140377000  |
| C | 2.980705000  | -3.461615000 | -1.037059000 |
| H | 3.351231000  | -3.002083000 | -1.964223000 |
| C | 1.755841000  | -4.155869000 | -1.108426000 |
| C | 1.301934000  | -4.878905000 | 0.030998000  |
| C | 2.039936000  | -4.787507000 | 1.224162000  |
| H | 1.715959000  | -5.327161000 | 2.124674000  |
| C | 3.240504000  | -4.051703000 | 1.311922000  |
| C | 0.088977000  | -5.810184000 | -0.028186000 |
| H | 0.154405000  | -6.452588000 | -0.928028000 |
| H | 0.156929000  | -6.487661000 | 0.845264000  |
| H | 5.834888000  | 0.866236000  | -3.106460000 |
| H | 4.443529000  | -3.253683000 | 2.592172000  |
| H | 4.389534000  | 2.651094000  | -2.381393000 |
| H | 2.312716000  | 5.463461000  | 3.068299000  |
| H | 4.661694000  | -0.721561000 | 3.194863000  |
| H | 0.352937000  | -4.752544000 | -2.354661000 |
| O | -1.476055000 | -5.385781000 | -2.363334000 |
| O | -3.410402000 | -3.446008000 | 2.482439000  |
| O | -4.777061000 | 1.327353000  | -2.204839000 |
| O | -5.469913000 | -1.623004000 | 2.467121000  |
| O | -3.962458000 | 4.120801000  | -2.260869000 |
| O | -0.667797000 | 3.896961000  | 2.231277000  |
| C | -2.034700000 | -4.931449000 | -1.197793000 |

|    |              |              |              |
|----|--------------|--------------|--------------|
| C  | -1.275686000 | -5.119568000 | -0.003858000 |
| C  | -1.814049000 | -4.615213000 | 1.206603000  |
| H  | -1.231132000 | -4.696718000 | 2.135604000  |
| C  | -3.052817000 | -3.914809000 | 1.268217000  |
| C  | -3.836829000 | -3.790629000 | 0.074560000  |
| C  | -3.304435000 | -4.308176000 | -1.132923000 |
| H  | -3.896426000 | -4.215702000 | -2.056482000 |
| C  | -5.218478000 | -3.122972000 | 0.072118000  |
| H  | -5.810663000 | -3.486778000 | 0.934454000  |
| H  | -5.754832000 | -3.451189000 | -0.837749000 |
| C  | -5.197419000 | -1.592028000 | 0.098864000  |
| C  | -5.324256000 | -0.877857000 | 1.322749000  |
| C  | -5.307671000 | 0.539975000  | 1.329944000  |
| H  | -5.427064000 | 1.077526000  | 2.282638000  |
| C  | -5.104582000 | 1.296221000  | 0.149710000  |
| C  | -4.953078000 | 0.579945000  | -1.079820000 |
| C  | -5.033318000 | -0.834412000 | -1.092428000 |
| H  | -4.941809000 | -1.368167000 | -2.050479000 |
| C  | -5.011231000 | 2.811648000  | 0.190432000  |
| H  | -5.430612000 | 3.163591000  | 1.152151000  |
| H  | -5.644957000 | 3.246379000  | -0.607207000 |
| C  | -3.589221000 | 3.363790000  | 0.045756000  |
| C  | -2.698154000 | 3.328017000  | 1.139074000  |
| H  | -2.968678000 | 2.806040000  | 2.067682000  |
| C  | -1.472662000 | 4.020643000  | 1.121363000  |
| C  | -1.131641000 | 4.805686000  | -0.015708000 |
| C  | -1.988271000 | 4.785272000  | -1.129763000 |
| H  | -1.752168000 | 5.370529000  | -2.029153000 |
| C  | -3.195885000 | 4.054150000  | -1.133245000 |
| C  | 0.093714000  | 5.721251000  | -0.026693000 |
| H  | 0.047134000  | 6.422569000  | 0.829660000  |
| H  | 0.039519000  | 6.341365000  | -0.941333000 |
| H  | -5.565325000 | -1.064482000 | 3.267666000  |
| H  | -4.507675000 | 3.312088000  | -2.333963000 |
| H  | -4.247432000 | -2.920241000 | 2.480974000  |
| H  | -2.052848000 | -5.231450000 | -3.139385000 |
| H  | -4.614469000 | 0.778654000  | -2.999333000 |
| H  | -0.063616000 | 4.663263000  | 2.335215000  |
| Li | -7.051171000 | -0.065807000 | -0.122438000 |
| Li | 3.487534000  | 6.003466000  | -0.551912000 |
| Li | 7.213294000  | -0.002044000 | 0.371318000  |
| Li | -3.001730000 | -6.547762000 | 0.699902000  |
| H  | 1.689313000  | 1.796993000  | 1.792828000  |
| H  | 1.063415000  | 2.226826000  | 1.918311000  |
| H  | -2.277322000 | -0.352754000 | 1.978374000  |
| H  | -2.396443000 | -1.011419000 | 2.351452000  |
| H  | 2.576214000  | 0.598572000  | -2.062959000 |
| H  | 2.503199000  | -0.120216000 | -1.806052000 |
| H  | -0.555852000 | -2.379360000 | -2.116261000 |

|                                           |              |              |              |
|-------------------------------------------|--------------|--------------|--------------|
| H                                         | -1.065660000 | -1.841949000 | -1.910043000 |
| H                                         | -1.691624000 | 0.443039000  | -0.934207000 |
| H                                         | -1.950617000 | 1.081463000  | -0.595242000 |
| H                                         | 1.057773000  | -1.721653000 | 0.536999000  |
| H                                         | 1.082073000  | -1.483449000 | 1.265879000  |
| <b>Li<sup>+</sup>@PPA-H<sub>2</sub>-7</b> |              |              |              |
| O                                         | 1.811550000  | 5.459692000  | 2.345592000  |
| O                                         | 3.643550000  | 3.020716000  | -2.304139000 |
| O                                         | 4.884133000  | -1.379511000 | 2.545758000  |
| O                                         | 5.822843000  | 1.337703000  | -2.222092000 |
| O                                         | 3.911785000  | -4.119428000 | 2.646638000  |
| O                                         | 1.184798000  | -4.210341000 | -2.214426000 |
| C                                         | 2.351392000  | 4.887500000  | 1.227517000  |
| C                                         | 1.564107000  | 4.941444000  | 0.035224000  |
| C                                         | 2.072598000  | 4.307961000  | -1.117796000 |
| H                                         | 1.481432000  | 4.310399000  | -2.043982000 |
| C                                         | 3.317096000  | 3.615456000  | -1.138287000 |
| C                                         | 4.134687000  | 3.627449000  | 0.038154000  |
| C                                         | 3.625457000  | 4.270867000  | 1.201580000  |
| H                                         | 4.238563000  | 4.276808000  | 2.115544000  |
| C                                         | 5.510166000  | 2.950105000  | 0.083894000  |
| H                                         | 6.115260000  | 3.260268000  | -0.790229000 |
| H                                         | 6.043472000  | 3.316942000  | 0.980784000  |
| C                                         | 5.465721000  | 1.419800000  | 0.131740000  |
| C                                         | 5.635877000  | 0.645876000  | -1.050095000 |
| C                                         | 5.612157000  | -0.770200000 | -0.989708000 |
| H                                         | 5.774688000  | -1.352714000 | -1.908825000 |
| C                                         | 5.344516000  | -1.467191000 | 0.213982000  |
| C                                         | 5.131851000  | -0.689791000 | 1.397366000  |
| C                                         | 5.231294000  | 0.722918000  | 1.348672000  |
| H                                         | 5.100106000  | 1.302749000  | 2.274572000  |
| C                                         | 5.249212000  | -2.982934000 | 0.241140000  |
| H                                         | 5.762312000  | -3.382051000 | -0.654476000 |
| H                                         | 5.794914000  | -3.375739000 | 1.121175000  |
| C                                         | 3.815430000  | -3.523556000 | 0.263487000  |
| C                                         | 3.058191000  | -3.562481000 | -0.924162000 |
| H                                         | 3.442307000  | -3.113149000 | -1.850709000 |
| C                                         | 1.828549000  | -4.246847000 | -1.004356000 |
| C                                         | 1.353172000  | -4.952803000 | 0.137078000  |
| C                                         | 2.075722000  | -4.852371000 | 1.339377000  |
| H                                         | 1.735300000  | -5.379243000 | 2.241384000  |
| C                                         | 3.281096000  | -4.125473000 | 1.435073000  |
| C                                         | 0.136111000  | -5.878655000 | 0.071019000  |
| H                                         | 0.213356000  | -6.533091000 | -0.819155000 |
| H                                         | 0.187250000  | -6.544571000 | 0.954415000  |
| H                                         | 5.961182000  | 0.745233000  | -2.991606000 |
| H                                         | 4.473303000  | -3.322359000 | 2.722222000  |
| H                                         | 4.513182000  | 2.550355000  | -2.293685000 |
| H                                         | 2.402093000  | 5.396084000  | 3.124372000  |

|    |              |              |              |
|----|--------------|--------------|--------------|
| H  | 4.703245000  | −0.791492000 | 3.307625000  |
| H  | 0.437823000  | −4.845066000 | −2.264266000 |
| O  | −1.386915000 | −5.472896000 | −2.294754000 |
| O  | −3.397084000 | −3.477080000 | 2.497888000  |
| O  | −4.614207000 | 1.270823000  | −2.241608000 |
| O  | −5.444823000 | −1.642755000 | 2.430839000  |
| O  | −3.792188000 | 4.059813000  | −2.302635000 |
| O  | −0.590987000 | 3.854265000  | 2.256992000  |
| C  | −1.962497000 | −5.002266000 | −1.144223000 |
| C  | −1.225264000 | −5.181672000 | 0.064570000  |
| C  | −1.781958000 | −4.662821000 | 1.260576000  |
| H  | −1.216500000 | −4.738834000 | 2.200843000  |
| C  | −3.018456000 | −3.956554000 | 1.293680000  |
| C  | −3.779726000 | −3.838277000 | 0.084828000  |
| C  | −3.229141000 | −4.370690000 | −1.107816000 |
| H  | −3.803751000 | −4.283566000 | −2.042815000 |
| C  | −5.155267000 | −3.159922000 | 0.050984000  |
| H  | −5.767886000 | −3.512930000 | 0.903453000  |
| H  | −5.676434000 | −3.488966000 | −0.867338000 |
| C  | −5.119639000 | −1.629162000 | 0.069059000  |
| C  | −5.265732000 | −0.906105000 | 1.285787000  |
| C  | −5.235791000 | 0.511483000  | 1.284324000  |
| H  | −5.372059000 | 1.055854000  | 2.230813000  |
| C  | −4.999824000 | 1.258103000  | 0.104127000  |
| C  | −4.825946000 | 0.532415000  | −1.116629000 |
| C  | −4.920473000 | −0.880999000 | −1.122970000 |
| H  | −4.812831000 | −1.422242000 | −2.075014000 |
| C  | −4.897811000 | 2.773120000  | 0.137126000  |
| H  | −5.334589000 | 3.133259000  | 1.088077000  |
| H  | −5.513897000 | 3.206208000  | −0.675224000 |
| C  | −3.471020000 | 3.318948000  | 0.017588000  |
| C  | −2.602416000 | 3.287761000  | 1.128972000  |
| H  | −2.893301000 | 2.770953000  | 2.054280000  |
| C  | −1.374144000 | 3.976033000  | 1.131864000  |
| C  | −1.009800000 | 4.756155000  | −0.001101000 |
| C  | −1.844807000 | 4.732848000  | −1.131721000 |
| H  | −1.590924000 | 5.317067000  | −2.026822000 |
| C  | −3.052627000 | 4.002370000  | −1.156779000 |
| C  | 0.220601000  | 5.664120000  | 0.004590000  |
| H  | 0.167967000  | 6.365191000  | 0.860677000  |
| H  | 0.182109000  | 6.285319000  | −0.910132000 |
| H  | −5.548097000 | −1.078680000 | 3.226513000  |
| H  | −4.337782000 | 3.251845000  | −2.381364000 |
| H  | −4.231972000 | −2.948325000 | 2.476647000  |
| H  | −1.949085000 | −5.323366000 | −3.082401000 |
| H  | −4.433707000 | 0.716172000  | −3.028069000 |
| H  | 0.021177000  | 4.613802000  | 2.363506000  |
| Li | −6.951380000 | −0.091350000 | −0.202068000 |
| Li | 3.621193000  | 5.919297000  | −0.483919000 |

|    |              |              |              |
|----|--------------|--------------|--------------|
| Li | 7.291068000  | −0.108326000 | 0.505857000  |
| Li | −2.967673000 | −6.598382000 | 0.765916000  |
| H  | 1.686712000  | 1.710287000  | 1.613822000  |
| H  | 1.110439000  | 2.156058000  | 1.861758000  |
| H  | −2.254330000 | −0.356191000 | 2.136703000  |
| H  | −2.389840000 | −1.037721000 | 2.459357000  |
| H  | −0.117321000 | 2.347128000  | −3.263164000 |
| H  | −0.603040000 | 2.731870000  | −2.811070000 |
| H  | −0.455877000 | −2.450931000 | −2.084796000 |
| H  | −1.023907000 | −1.969959000 | −1.890849000 |
| H  | −1.630394000 | 0.282761000  | −0.762772000 |
| H  | −1.843669000 | 0.987339000  | −0.545204000 |
| H  | 1.250224000  | −1.738606000 | 0.562584000  |
| H  | 1.249372000  | −1.304906000 | 1.195408000  |
| H  | 2.631453000  | 0.654732000  | −1.697545000 |
| H  | 2.491088000  | 0.044552000  | −1.255391000 |

### 3. Li<sup>+</sup>@PPA, H<sub>2</sub> is on Li<sup>+</sup>

#### Li<sup>+</sup>@PPA-H<sub>2</sub>-1

|   |             |              |              |
|---|-------------|--------------|--------------|
| O | 1.712973000 | 5.385097000  | 2.469658000  |
| O | 3.639010000 | 3.364026000  | −2.349156000 |
| O | 4.887475000 | −1.389404000 | 2.430158000  |
| O | 5.641759000 | 1.461967000  | −2.296042000 |
| O | 3.824880000 | −4.084965000 | 2.484784000  |
| O | 1.023391000 | −4.194491000 | −2.333885000 |
| C | 2.257636000 | 4.886930000  | 1.314254000  |
| C | 1.498068000 | 5.060242000  | 0.118578000  |
| C | 2.031778000 | 4.532187000  | −1.084094000 |
| H | 1.448759000 | 4.603185000  | −2.014202000 |
| C | 3.267885000 | 3.826915000  | −1.136210000 |
| C | 4.042092000 | 3.699939000  | 0.062331000  |
| C | 3.514819000 | 4.238630000  | 1.261320000  |
| H | 4.105537000 | 4.153938000  | 2.186629000  |
| C | 5.411743000 | 3.009627000  | 0.074076000  |
| H | 6.008538000 | 3.348535000  | −0.795259000 |
| H | 5.956333000 | 3.341297000  | 0.977781000  |
| C | 5.360131000 | 1.478863000  | 0.071783000  |
| C | 5.470975000 | 0.740070000  | −1.140173000 |
| C | 5.430502000 | −0.678243000 | −1.120918000 |
| H | 5.549006000 | −1.234850000 | −2.062899000 |
| C | 5.214138000 | −1.411690000 | 0.072691000  |
| C | 5.074337000 | −0.668569000 | 1.288340000  |
| C | 5.181276000 | 0.744797000  | 1.275903000  |
| H | 5.103396000 | 1.297287000  | 2.224539000  |
| C | 5.112017000 | −2.928280000 | 0.058854000  |
| H | 5.599249000 | −3.301872000 | −0.861791000 |
| H | 5.682167000 | −3.345838000 | 0.911665000  |
| C | 3.680041000 | −3.475405000 | 0.105508000  |
| C | 2.906065000 | −3.523144000 | −1.071062000 |

|   |              |              |              |
|---|--------------|--------------|--------------|
| H | 3.274286000  | −3.072632000 | −2.003510000 |
| C | 1.680518000  | −4.218765000 | −1.135920000 |
| C | 1.229206000  | −4.926055000 | 0.015673000  |
| C | 1.968316000  | −4.819912000 | 1.207708000  |
| H | 1.646645000  | −5.351692000 | 2.113808000  |
| C | 3.170679000  | −4.085785000 | 1.284962000  |
| C | 0.014033000  | −5.855258000 | −0.032246000 |
| H | 0.074231000  | −6.503410000 | −0.928355000 |
| H | 0.079787000  | −6.526167000 | 0.846389000  |
| H | 5.727603000  | 0.888022000  | −3.086651000 |
| H | 4.396684000  | −3.294352000 | 2.550323000  |
| H | 4.457954000  | 2.812695000  | −2.333715000 |
| H | 2.294341000  | 5.248969000  | 3.245601000  |
| H | 4.762211000  | −0.821725000 | 3.218159000  |
| H | 0.268234000  | −4.818919000 | −2.361813000 |
| O | −1.562921000 | −5.454385000 | −2.364957000 |
| O | −3.464758000 | −3.449616000 | 2.469556000  |
| O | −4.759395000 | 1.303111000  | −2.288983000 |
| O | −5.474015000 | −1.561204000 | 2.435444000  |
| O | −3.700202000 | 3.998258000  | −2.347532000 |
| O | −0.850190000 | 4.095131000  | 2.443020000  |
| C | −2.106640000 | −4.969340000 | −1.204562000 |
| C | −1.345183000 | −5.153702000 | −0.010140000 |
| C | −1.877619000 | −4.637148000 | 1.197871000  |
| H | −1.295109000 | −4.721360000 | 2.126975000  |
| C | −3.108635000 | −3.921036000 | 1.258045000  |
| C | −3.891404000 | −3.793638000 | 0.063077000  |
| C | −3.367124000 | −4.325829000 | −1.142258000 |
| H | −3.961712000 | −4.236291000 | −2.064701000 |
| C | −5.261150000 | −3.102292000 | 0.060170000  |
| H | −5.853163000 | −3.442761000 | 0.932171000  |
| H | −5.810641000 | −3.432122000 | −0.841299000 |
| C | −5.210190000 | −1.571351000 | 0.065733000  |
| C | −5.312597000 | −0.835833000 | 1.280359000  |
| C | −5.272546000 | 0.582580000  | 1.264671000  |
| H | −5.383320000 | 1.136611000  | 2.209116000  |
| C | −5.065832000 | 1.319299000  | 0.071259000  |
| C | −4.936047000 | 0.579327000  | −1.147567000 |
| C | −5.041979000 | −0.834102000 | −1.138010000 |
| H | −4.972294000 | −1.383708000 | −2.088973000 |
| C | −4.963174000 | 2.835763000  | 0.088220000  |
| H | −5.441150000 | 3.207083000  | 1.014607000  |
| H | −5.541519000 | 3.255785000  | −0.757883000 |
| C | −3.531300000 | 3.381952000  | 0.028597000  |
| C | −2.745553000 | 3.426659000  | 1.197634000  |
| H | −3.104874000 | 2.974486000  | 2.132739000  |
| C | −1.519348000 | 4.122048000  | 1.252058000  |
| C | −1.078837000 | 4.830977000  | 0.097041000  |
| C | −1.829819000 | 4.727657000  | −1.087555000 |

|                                           |              |              |              |
|-------------------------------------------|--------------|--------------|--------------|
| H                                         | −1.516038000 | 5.260187000  | −1.995999000 |
| C                                         | −3.033691000 | 3.994977000  | −1.154350000 |
| C                                         | 0.136951000  | 5.759613000  | 0.134169000  |
| H                                         | 0.077032000  | 6.417107000  | 1.023612000  |
| H                                         | 0.067089000  | 6.421655000  | −0.751239000 |
| H                                         | −5.557325000 | −0.990307000 | 3.228620000  |
| H                                         | −4.272889000 | 3.208095000  | −2.409573000 |
| H                                         | −4.288101000 | −2.903918000 | 2.463347000  |
| H                                         | −2.142387000 | −5.307217000 | −3.140356000 |
| H                                         | −4.640111000 | 0.737793000  | −3.079598000 |
| H                                         | −0.100503000 | 4.726768000  | 2.469447000  |
| Li                                        | −7.037559000 | −0.011697000 | −0.163479000 |
| Li                                        | 3.151067000  | 6.523083000  | −0.685697000 |
| Li                                        | 7.181545000  | −0.075802000 | 0.320602000  |
| Li                                        | −3.093454000 | −6.549949000 | 0.684802000  |
| H                                         | 4.040430000  | 6.995755000  | −2.406261000 |
| H                                         | 4.100610000  | 7.677624000  | −2.054606000 |
| <b>Li<sup>+</sup>@PPA-H<sub>2</sub>-2</b> |              |              |              |
| O                                         | 1.720781000  | 5.275975000  | 2.630797000  |
| O                                         | 3.728307000  | 3.422266000  | −2.221339000 |
| O                                         | 4.882264000  | −1.528710000 | 2.470477000  |
| O                                         | 5.651517000  | 1.434830000  | −2.184177000 |
| O                                         | 3.799523000  | −4.215397000 | 2.456968000  |
| O                                         | 1.000744000  | −4.197945000 | −2.364657000 |
| C                                         | 2.270244000  | 4.786441000  | 1.470762000  |
| C                                         | 1.530111000  | 5.001727000  | 0.271786000  |
| C                                         | 2.081924000  | 4.511939000  | −0.937963000 |
| H                                         | 1.517102000  | 4.617391000  | −1.876215000 |
| C                                         | 3.318260000  | 3.809555000  | −0.991456000 |
| C                                         | 4.062061000  | 3.621421000  | 0.215563000  |
| C                                         | 3.514759000  | 4.119077000  | 1.422668000  |
| H                                         | 4.085981000  | 3.996643000  | 2.355834000  |
| C                                         | 5.428057000  | 2.924508000  | 0.226316000  |
| H                                         | 6.035778000  | 3.283990000  | −0.627111000 |
| H                                         | 5.963573000  | 3.229993000  | 1.144594000  |
| C                                         | 5.369944000  | 1.394913000  | 0.184064000  |
| C                                         | 5.474834000  | 0.686453000  | −1.046302000 |
| C                                         | 5.424666000  | −0.731602000 | −1.062813000 |
| H                                         | 5.538129000  | −1.265354000 | −2.018594000 |
| C                                         | 5.205050000  | −1.494007000 | 0.112070000  |
| C                                         | 5.071965000  | −0.781187000 | 1.346271000  |
| C                                         | 5.188096000  | 0.631349000  | 1.369013000  |
| H                                         | 5.114995000  | 1.160360000  | 2.331364000  |
| C                                         | 5.094303000  | −3.009196000 | 0.059977000  |
| H                                         | 5.580444000  | −3.362165000 | −0.869396000 |
| H                                         | 5.661841000  | −3.450921000 | 0.902296000  |
| C                                         | 3.659808000  | −3.550349000 | 0.092454000  |
| C                                         | 2.886570000  | −3.567155000 | −1.085526000 |
| H                                         | 3.257783000  | −3.097681000 | −2.007431000 |

|   |              |              |              |
|---|--------------|--------------|--------------|
| C | 1.657288000  | −4.254292000 | −1.167230000 |
| C | 1.201097000  | −4.985336000 | −0.032643000 |
| C | 1.939920000  | −4.910815000 | 1.162037000  |
| H | 1.614495000  | −5.461209000 | 2.055601000  |
| C | 3.146135000  | −4.185168000 | 1.257023000  |
| C | −0.019973000 | −5.905457000 | −0.102368000 |
| H | 0.039305000  | −6.537130000 | −1.010175000 |
| H | 0.037878000  | −6.593344000 | 0.763654000  |
| H | 5.730740000  | 0.879231000  | −2.988345000 |
| H | 4.374308000  | −3.428643000 | 2.541355000  |
| H | 4.521292000  | 2.834382000  | −2.208312000 |
| H | 2.285439000  | 5.099903000  | 3.410987000  |
| H | 4.762727000  | −0.979288000 | 3.272163000  |
| H | 0.247328000  | −4.823320000 | −2.410805000 |
| O | −1.587500000 | −5.454000000 | −2.432459000 |
| O | −3.488322000 | −3.517533000 | 2.430236000  |
| O | −4.745393000 | 1.319707000  | −2.257112000 |
| O | −5.483294000 | −1.612935000 | 2.421689000  |
| O | −3.639609000 | 3.995167000  | −2.263575000 |
| O | −0.860482000 | 4.032152000  | 2.569238000  |
| C | −2.131103000 | −4.985029000 | −1.265468000 |
| C | −1.374207000 | −5.194865000 | −0.072219000 |
| C | −1.906260000 | −4.694936000 | 1.142812000  |
| H | −1.326943000 | −4.799316000 | 2.071872000  |
| C | −3.132335000 | −3.971253000 | 1.211894000  |
| C | −3.911144000 | −3.818542000 | 0.017278000  |
| C | −3.387350000 | −4.333991000 | −1.195575000 |
| H | −3.978793000 | −4.224750000 | −2.117879000 |
| C | −5.276441000 | −3.118314000 | 0.022851000  |
| H | −5.872091000 | −3.468632000 | 0.888475000  |
| H | −5.826590000 | −3.430549000 | −0.884520000 |
| C | −5.215974000 | −1.587984000 | 0.052410000  |
| C | −5.315480000 | −0.870853000 | 1.278173000  |
| C | −5.266784000 | 0.547340000  | 1.284680000  |
| H | −5.375116000 | 1.087377000  | 2.237497000  |
| C | −5.054489000 | 1.301542000  | 0.103134000  |
| C | −4.927284000 | 0.579767000  | −1.126895000 |
| C | −5.041765000 | −0.832990000 | −1.139309000 |
| H | −4.974271000 | −1.368203000 | −2.098639000 |
| C | −4.944189000 | 2.817123000  | 0.143912000  |
| H | −5.431086000 | 3.177038000  | 1.070190000  |
| H | −5.510653000 | 3.252408000  | −0.702465000 |
| C | −3.508910000 | 3.356289000  | 0.109212000  |
| C | −2.739630000 | 3.386041000  | 1.289631000  |
| H | −3.115078000 | 2.928766000  | 2.215946000  |
| C | −1.509544000 | 4.072384000  | 1.368020000  |
| C | −1.047724000 | 4.788200000  | 0.225564000  |
| C | −1.782598000 | 4.700061000  | −0.970364000 |
| H | −1.452490000 | 5.238359000  | −1.869567000 |



|                                           |              |              |              |
|-------------------------------------------|--------------|--------------|--------------|
| C                                         | -2.990316000 | 3.976378000  | -1.061011000 |
| C                                         | 0.173380000  | 5.708603000  | 0.287867000  |
| H                                         | 0.108001000  | 6.350680000  | 1.188103000  |
| H                                         | 0.114404000  | 6.386513000  | -0.586368000 |
| H                                         | -5.562895000 | -1.053654000 | 3.223453000  |
| H                                         | -4.220561000 | 3.212240000  | -2.339535000 |
| H                                         | -4.307093000 | -2.965019000 | 2.430702000  |
| H                                         | -2.163315000 | -5.288156000 | -3.206796000 |
| H                                         | -4.628039000 | 0.765575000  | -3.055897000 |
| H                                         | -0.093571000 | 4.642594000  | 2.605945000  |
| Li                                        | -7.033719000 | -0.010719000 | -0.151996000 |
| Li                                        | 3.150990000  | 6.539924000  | -0.545217000 |
| Li                                        | 7.180024000  | -0.178465000 | 0.389792000  |
| Li                                        | -3.137835000 | -6.586928000 | 0.591227000  |
| H                                         | 4.097290000  | 6.445843000  | -2.327116000 |
| H                                         | 4.304910000  | 7.160703000  | -2.129477000 |
| H                                         | 2.792772000  | 7.839376000  | 0.948476000  |
| H                                         | 3.232232000  | 8.293902000  | 0.510091000  |
| <b>Li<sup>+</sup>@PPA-H<sub>2</sub>-3</b> |              |              |              |
| O                                         | 1.512382000  | 4.893068000  | 2.793917000  |
| O                                         | 3.861436000  | 3.910763000  | -2.156650000 |
| O                                         | 5.091674000  | -1.530712000 | 2.409435000  |
| O                                         | 5.380029000  | 1.580532000  | -2.205080000 |
| O                                         | 3.923715000  | -4.177828000 | 2.395452000  |
| O                                         | 0.859894000  | -4.162802000 | -2.262399000 |
| C                                         | 2.130285000  | 4.603976000  | 1.601638000  |
| C                                         | 1.453717000  | 5.006143000  | 0.417424000  |
| C                                         | 2.091713000  | 4.735351000  | -0.817665000 |
| H                                         | 1.560044000  | 4.941073000  | -1.761910000 |
| C                                         | 3.342098000  | 4.060390000  | -0.903333000 |
| C                                         | 4.008738000  | 3.668315000  | 0.292432000  |
| C                                         | 3.376138000  | 3.948512000  | 1.525576000  |
| H                                         | 3.886231000  | 3.671621000  | 2.460877000  |
| C                                         | 5.385875000  | 2.995017000  | 0.270002000  |
| H                                         | 5.976536000  | 3.393266000  | -0.577554000 |
| H                                         | 5.926060000  | 3.276834000  | 1.193232000  |
| C                                         | 5.343434000  | 1.468636000  | 0.180531000  |
| C                                         | 5.322368000  | 0.800288000  | -1.075979000 |
| C                                         | 5.275952000  | -0.616600000 | -1.132897000 |
| H                                         | 5.294494000  | -1.118783000 | -2.112149000 |
| C                                         | 5.177294000  | -1.418861000 | 0.032430000  |
| C                                         | 5.168405000  | -0.747714000 | 1.295560000  |
| C                                         | 5.289083000  | 0.664459000  | 1.350880000  |
| H                                         | 5.321275000  | 1.160681000  | 2.332802000  |
| C                                         | 5.069721000  | -2.933315000 | -0.059502000 |
| H                                         | 5.495320000  | -3.253235000 | -1.029641000 |
| H                                         | 5.696162000  | -3.395494000 | 0.728343000  |
| C                                         | 3.646122000  | -3.493431000 | 0.048866000  |
| C                                         | 2.809572000  | -3.513696000 | -1.085548000 |

|   |              |              |              |
|---|--------------|--------------|--------------|
| H | 3.123652000  | −3.032169000 | −2.022155000 |
| C | 1.589992000  | −4.220473000 | −1.105690000 |
| C | 1.205496000  | −4.964939000 | 0.046440000  |
| C | 2.007184000  | −4.889327000 | 1.199027000  |
| H | 1.737402000  | −5.448368000 | 2.105750000  |
| C | 3.207297000  | −4.146864000 | 1.233320000  |
| C | −0.006597000 | −5.898845000 | 0.035329000  |
| H | 0.052403000  | −6.579128000 | −0.837230000 |
| H | 0.063556000  | −6.537994000 | 0.936758000  |
| H | 5.368231000  | 1.044227000  | −3.025542000 |
| H | 4.512729000  | −3.398499000 | 2.447034000  |
| H | 4.517252000  | 3.173977000  | −2.202302000 |
| H | 2.055311000  | 4.632497000  | 3.564938000  |
| H | 5.065337000  | −1.006942000 | 3.236492000  |
| H | 0.187344000  | −4.874171000 | −2.315204000 |
| O | −1.608100000 | −5.625167000 | −2.299579000 |
| O | −3.477337000 | −3.392056000 | 2.447474000  |
| O | −4.725871000 | 1.197849000  | −2.374067000 |
| O | −5.563707000 | −1.585184000 | 2.378107000  |
| O | −3.442370000 | 3.795897000  | −2.364966000 |
| O | −1.205547000 | 4.130071000  | 2.728462000  |
| C | −2.142517000 | −5.083705000 | −1.160014000 |
| C | −1.367867000 | −5.201504000 | 0.034432000  |
| C | −1.892446000 | −4.628708000 | 1.220003000  |
| H | −1.301254000 | −4.665667000 | 2.146691000  |
| C | −3.128632000 | −3.920094000 | 1.257175000  |
| C | −3.921681000 | −3.853901000 | 0.063841000  |
| C | −3.405109000 | −4.442015000 | −1.118878000 |
| H | −4.007384000 | −4.399120000 | −2.039744000 |
| C | −5.292614000 | −3.166210000 | 0.037598000  |
| H | −5.892100000 | −3.491524000 | 0.910257000  |
| H | −5.833792000 | −3.513508000 | −0.862314000 |
| C | −5.243588000 | −1.635357000 | 0.016448000  |
| C | −5.381067000 | −0.878374000 | 1.214652000  |
| C | −5.350522000 | 0.539444000  | 1.174047000  |
| H | −5.490715000 | 1.109898000  | 2.104476000  |
| C | −5.112062000 | 1.255025000  | −0.026321000 |
| C | −4.939591000 | 0.493723000  | −1.226385000 |
| C | −5.042279000 | −0.919668000 | −1.195222000 |
| H | −4.941611000 | −1.486410000 | −2.133173000 |
| C | −5.011803000 | 2.772193000  | −0.031857000 |
| H | −5.577434000 | 3.162077000  | 0.835640000  |
| H | −5.503173000 | 3.173432000  | −0.939272000 |
| C | −3.577651000 | 3.309760000  | 0.046256000  |
| C | −2.935303000 | 3.406982000  | 1.296019000  |
| H | −3.410783000 | 3.011828000  | 2.204992000  |
| C | −1.708481000 | 4.084433000  | 1.463671000  |
| C | −1.120662000 | 4.728286000  | 0.335204000  |
| C | −1.726305000 | 4.566072000  | −0.924377000 |

|                                           |              |              |              |
|-------------------------------------------|--------------|--------------|--------------|
| H                                         | −1.301942000 | 5.049347000  | −1.815640000 |
| C                                         | −2.927820000 | 3.847566000  | −1.099296000 |
| C                                         | 0.080815000  | 5.670171000  | 0.475700000  |
| H                                         | −0.007873000 | 6.240046000  | 1.420835000  |
| H                                         | 0.008971000  | 6.409717000  | −0.346263000 |
| H                                         | −5.671616000 | −1.001401000 | 3.158876000  |
| H                                         | −4.063236000 | 3.044760000  | −2.445827000 |
| H                                         | −4.322593000 | −2.881234000 | 2.431747000  |
| H                                         | −2.195053000 | −5.516982000 | −3.075836000 |
| H                                         | −4.580550000 | 0.618744000  | −3.150227000 |
| H                                         | −0.317716000 | 4.547674000  | 2.762233000  |
| Li                                        | −7.066211000 | −0.092271000 | −0.292470000 |
| Li                                        | 3.094737000  | 6.826454000  | −1.001865000 |
| Li                                        | 7.167676000  | −0.141031000 | 0.156638000  |
| Li                                        | −3.110381000 | −6.563974000 | 0.772878000  |
| H                                         | 4.279050000  | 6.269539000  | −2.563175000 |
| H                                         | 4.357375000  | 7.035356000  | −2.571957000 |
| H                                         | 4.119434000  | 6.750864000  | 0.722711000  |
| H                                         | 4.392566000  | 7.417405000  | 0.453968000  |
| H                                         | 2.360417000  | 8.713477000  | −1.376820000 |
| H                                         | 1.730366000  | 8.287956000  | −1.260380000 |
| <b>Li<sup>+</sup>@PPA-H<sub>2</sub>-4</b> |              |              |              |
| O                                         | 1.583048000  | 4.975019000  | 2.800774000  |
| O                                         | 3.936222000  | 3.775286000  | −2.098438000 |
| O                                         | 5.012533000  | −1.572095000 | 2.539511000  |
| O                                         | 5.520477000  | 1.488355000  | −2.089170000 |
| O                                         | 3.820092000  | −4.209725000 | 2.500175000  |
| O                                         | 0.966509000  | −4.203805000 | −2.289537000 |
| C                                         | 2.201501000  | 4.627487000  | 1.623445000  |
| C                                         | 1.532756000  | 4.986381000  | 0.422219000  |
| C                                         | 2.169356000  | 4.658608000  | −0.798263000 |
| H                                         | 1.639745000  | 4.826266000  | −1.750015000 |
| C                                         | 3.414711000  | 3.974654000  | −0.852765000 |
| C                                         | 4.070746000  | 3.617683000  | 0.359003000  |
| C                                         | 3.437647000  | 3.951918000  | 1.578144000  |
| H                                         | 3.940349000  | 3.705123000  | 2.525809000  |
| C                                         | 5.439876000  | 2.928214000  | 0.368640000  |
| H                                         | 6.051432000  | 3.310361000  | −0.471549000 |
| H                                         | 5.965970000  | 3.213376000  | 1.298914000  |
| C                                         | 5.383188000  | 1.401315000  | 0.293446000  |
| C                                         | 5.409218000  | 0.719766000  | −0.955906000 |
| C                                         | 5.353948000  | −0.697174000 | −1.000821000 |
| H                                         | 5.410166000  | −1.209713000 | −1.973239000 |
| C                                         | 5.200772000  | −1.486276000 | 0.167412000  |
| C                                         | 5.142622000  | −0.801293000 | 1.421946000  |
| C                                         | 5.270788000  | 0.610341000  | 1.468568000  |
| H                                         | 5.262019000  | 1.117076000  | 2.445584000  |
| C                                         | 5.085721000  | −3.000581000 | 0.086446000  |
| H                                         | 5.551442000  | −3.334140000 | −0.860407000 |

|   |              |              |              |
|---|--------------|--------------|--------------|
| H | 5.671711000  | −3.459257000 | 0.906645000  |
| C | 3.653411000  | −3.545993000 | 0.136865000  |
| C | 2.867259000  | −3.567475000 | −1.032653000 |
| H | 3.227753000  | −3.099425000 | −1.959421000 |
| C | 1.639800000  | −4.258464000 | −1.099994000 |
| C | 1.197264000  | −4.988134000 | 0.040576000  |
| C | 1.948878000  | −4.910165000 | 1.226825000  |
| H | 1.633792000  | −5.459253000 | 2.124890000  |
| C | 3.154836000  | −4.181506000 | 1.307509000  |
| C | −0.023055000 | −5.909922000 | −0.014543000 |
| H | 0.045138000  | −6.569038000 | −0.902192000 |
| H | 0.024974000  | −6.571315000 | 0.872327000  |
| H | 5.542633000  | 0.943832000  | −2.904004000 |
| H | 4.411893000  | −3.434083000 | 2.572291000  |
| H | 4.606634000  | 3.050793000  | −2.114799000 |
| H | 2.122255000  | 4.743247000  | 3.583541000  |
| H | 4.949271000  | −1.039156000 | 3.358640000  |
| H | 0.247782000  | −4.868043000 | −2.344862000 |
| O | −1.572977000 | −5.546950000 | −2.371647000 |
| O | −3.514295000 | −3.436879000 | 2.402336000  |
| O | −4.680202000 | 1.264137000  | −2.391006000 |
| O | −5.544826000 | −1.568952000 | 2.327073000  |
| O | −3.416980000 | 3.871624000  | −2.366120000 |
| O | −1.095706000 | 4.095837000  | 2.696008000  |
| C | −2.125539000 | −5.035099000 | −1.227073000 |
| C | −1.377211000 | −5.198999000 | −0.021185000 |
| C | −1.919338000 | −4.655991000 | 1.170504000  |
| H | −1.347201000 | −4.726123000 | 2.107207000  |
| C | −3.147478000 | −3.933348000 | 1.204024000  |
| C | −3.916449000 | −3.824175000 | −0.001807000 |
| C | −3.382391000 | −4.382207000 | −1.191249000 |
| H | −3.966085000 | −4.306213000 | −2.121865000 |
| C | −5.281151000 | −3.124154000 | −0.032882000 |
| H | −5.891146000 | −3.455462000 | 0.830149000  |
| H | −5.816587000 | −3.455596000 | −0.942197000 |
| C | −5.219899000 | −1.593535000 | −0.034749000 |
| C | −5.351915000 | −0.850319000 | 1.172593000  |
| C | −5.308799000 | 0.567642000  | 1.149344000  |
| H | −5.444697000 | 1.127981000  | 2.086596000  |
| C | −5.064530000 | 1.296145000  | −0.042169000 |
| C | −4.898697000 | 0.548228000  | −1.251547000 |
| C | −5.012351000 | −0.864569000 | −1.237434000 |
| H | −4.916357000 | −1.420522000 | −2.182322000 |
| C | −4.952765000 | 2.812312000  | −0.029428000 |
| H | −5.505434000 | 3.194961000  | 0.849600000  |
| H | −5.451768000 | 3.228634000  | −0.925899000 |
| C | −3.514285000 | 3.339547000  | 0.036911000  |
| C | −2.851797000 | 3.411175000  | 1.277920000  |
| H | −3.314647000 | 3.001784000  | 2.187169000  |

|                                           |              |              |              |
|-------------------------------------------|--------------|--------------|--------------|
| C                                         | -1.619590000 | 4.080718000  | 1.438915000  |
| C                                         | -1.045913000 | 4.741332000  | 0.313035000  |
| C                                         | -1.673014000 | 4.605767000  | -0.939173000 |
| H                                         | -1.258675000 | 5.101757000  | -1.828147000 |
| C                                         | -2.880653000 | 3.896506000  | -1.108345000 |
| C                                         | 0.167140000  | 5.668430000  | 0.446691000  |
| H                                         | 0.074948000  | 6.262435000  | 1.376883000  |
| H                                         | 0.114501000  | 6.387284000  | -0.394486000 |
| H                                         | -5.645860000 | -0.993310000 | 3.114754000  |
| H                                         | -4.031688000 | 3.116174000  | -2.453701000 |
| H                                         | -4.342743000 | -2.899406000 | 2.380309000  |
| H                                         | -2.143485000 | -5.411142000 | -3.155704000 |
| H                                         | -4.540739000 | 0.693004000  | -3.174079000 |
| H                                         | -0.228442000 | 4.554695000  | 2.738805000  |
| Li                                        | -7.029620000 | -0.032971000 | -0.323493000 |
| Li                                        | 3.101665000  | 6.816543000  | -1.142548000 |
| Li                                        | 7.191231000  | -0.208111000 | 0.358755000  |
| Li                                        | -3.149508000 | -6.563078000 | 0.658461000  |
| H                                         | 2.107236000  | 7.151962000  | -3.062516000 |
| H                                         | 1.689442000  | 7.625639000  | -2.626777000 |
| H                                         | 4.365116000  | 6.490849000  | 0.478705000  |
| H                                         | 4.611687000  | 7.195366000  | 0.302170000  |
| H                                         | 2.384048000  | 8.701132000  | -0.390357000 |
| H                                         | 1.982135000  | 8.189174000  | 0.017069000  |
| H                                         | 4.526755000  | 6.071333000  | -2.500526000 |
| H                                         | 4.678908000  | 6.825510000  | -2.521784000 |
| <b>Li<sup>+</sup>@PPA-H<sub>2</sub>-5</b> |              |              |              |
| O                                         | 1.517255000  | 4.868456000  | 2.767378000  |
| O                                         | 3.972632000  | 3.916118000  | -2.135694000 |
| O                                         | 5.086257000  | -1.549227000 | 2.496652000  |
| O                                         | 5.393149000  | 1.508943000  | -2.151736000 |
| O                                         | 3.863032000  | -4.169613000 | 2.500620000  |
| O                                         | 0.893511000  | -4.243410000 | -2.217474000 |
| C                                         | 2.156316000  | 4.573908000  | 1.584358000  |
| C                                         | 1.509452000  | 4.989370000  | 0.388870000  |
| C                                         | 2.169620000  | 4.728547000  | -0.832222000 |
| H                                         | 1.674322000  | 4.967893000  | -1.785744000 |
| C                                         | 3.417654000  | 4.054474000  | -0.892793000 |
| C                                         | 4.051065000  | 3.635319000  | 0.310328000  |
| C                                         | 3.394409000  | 3.905301000  | 1.533340000  |
| H                                         | 3.878423000  | 3.611125000  | 2.477166000  |
| C                                         | 5.421737000  | 2.949727000  | 0.308548000  |
| H                                         | 6.023803000  | 3.332602000  | -0.537997000 |
| H                                         | 5.956756000  | 3.234150000  | 1.234189000  |
| C                                         | 5.364197000  | 1.423526000  | 0.235084000  |
| C                                         | 5.331970000  | 0.742156000  | -1.014503000 |
| C                                         | 5.275049000  | -0.674838000 | -1.055836000 |
| H                                         | 5.288685000  | -1.187708000 | -2.029599000 |
| C                                         | 5.174042000  | -1.463824000 | 0.118502000  |

|   |              |              |              |
|---|--------------|--------------|--------------|
| C | 5.169982000  | −0.779063000 | 1.373882000  |
| C | 5.303710000  | 0.632571000  | 1.413776000  |
| H | 5.341246000  | 1.139305000  | 2.390085000  |
| C | 5.061521000  | −2.979151000 | 0.042555000  |
| H | 5.500643000  | −3.311497000 | −0.917305000 |
| H | 5.674334000  | −3.433934000 | 0.845173000  |
| C | 3.634989000  | −3.534115000 | 0.134809000  |
| C | 2.821306000  | −3.576261000 | −1.015434000 |
| H | 3.156114000  | −3.115950000 | −1.955499000 |
| C | 1.599537000  | −4.278769000 | −1.044974000 |
| C | 1.189593000  | −4.997166000 | 0.114726000  |
| C | 1.968417000  | −4.899755000 | 1.281323000  |
| H | 1.678804000  | −5.439392000 | 2.193605000  |
| C | 3.170453000  | −4.160759000 | 1.323902000  |
| C | −0.026220000 | −5.926051000 | 0.099151000  |
| H | 0.041321000  | −6.618477000 | −0.763053000 |
| H | 0.026932000  | −6.552757000 | 1.010331000  |
| H | 5.366159000  | 0.963493000  | −2.965569000 |
| H | 4.461285000  | −3.396751000 | 2.544959000  |
| H | 4.592648000  | 3.150251000  | −2.176558000 |
| H | 2.042829000  | 4.593663000  | 3.545190000  |
| H | 5.064056000  | −1.015880000 | 3.317653000  |
| H | 0.213533000  | −4.947886000 | −2.264985000 |
| O | −1.592724000 | −5.676093000 | −2.261943000 |
| O | −3.513049000 | −3.362546000 | 2.425701000  |
| O | −4.645356000 | 1.181807000  | −2.462171000 |
| O | −5.586231000 | −1.542878000 | 2.304573000  |
| O | −3.359411000 | 3.784999000  | −2.458389000 |
| O | −1.190729000 | 4.125982000  | 2.663971000  |
| C | −2.138869000 | −5.113251000 | −1.138089000 |
| C | −1.382479000 | −5.220218000 | 0.069088000  |
| C | −1.920369000 | −4.627955000 | 1.238771000  |
| H | −1.344171000 | −4.658097000 | 2.175021000  |
| C | −3.150745000 | −3.908479000 | 1.247845000  |
| C | −3.925148000 | −3.850946000 | 0.041585000  |
| C | −3.396053000 | −4.459424000 | −1.125412000 |
| H | −3.983825000 | −4.424042000 | −2.055935000 |
| C | −5.289157000 | −3.151572000 | −0.014013000 |
| H | −5.905069000 | −3.462138000 | 0.852505000  |
| H | −5.819044000 | −3.503895000 | −0.918666000 |
| C | −5.226265000 | −1.621455000 | −0.050692000 |
| C | −5.378712000 | −0.850335000 | 1.136545000  |
| C | −5.339347000 | 0.566666000  | 1.080771000  |
| H | −5.492942000 | 1.148222000  | 2.002123000  |
| C | −5.075992000 | 1.267499000  | −0.123087000 |
| C | −4.885517000 | 0.491727000  | −1.311172000 |
| C | −4.998250000 | −0.920434000 | −1.266537000 |
| H | −4.884494000 | −1.498075000 | −2.196250000 |
| C | −4.967029000 | 2.783470000  | −0.144043000 |

|    |              |              |              |
|----|--------------|--------------|--------------|
| H  | -5.544827000 | 3.186549000  | 0.709366000  |
| H  | -5.439563000 | 3.177438000  | -1.064478000 |
| C  | -3.530392000 | 3.310615000  | -0.047397000 |
| C  | -2.904342000 | 3.407481000  | 1.210653000  |
| H  | -3.394193000 | 3.018546000  | 2.114780000  |
| C  | -1.675644000 | 4.077631000  | 1.392531000  |
| C  | -1.068074000 | 4.714829000  | 0.270452000  |
| C  | -1.657610000 | 4.551233000  | -0.996472000 |
| H  | -1.215988000 | 5.026617000  | -1.883539000 |
| C  | -2.860876000 | 3.839350000  | -1.185505000 |
| C  | 0.134811000  | 5.652818000  | 0.423764000  |
| H  | 0.029962000  | 6.224762000  | 1.366379000  |
| H  | 0.077179000  | 6.388273000  | -0.401770000 |
| H  | -5.699949000 | -0.949525000 | 3.077250000  |
| H  | -3.974561000 | 3.029920000  | -2.545409000 |
| H  | -4.353770000 | -2.845100000 | 2.390909000  |
| H  | -2.166085000 | -5.571171000 | -3.048678000 |
| H  | -4.488563000 | 0.592830000  | -3.228561000 |
| H  | -0.295579000 | 4.528496000  | 2.706857000  |
| Li | -7.029923000 | -0.072287000 | -0.405910000 |
| Li | 3.312343000  | 7.191983000  | -1.056207000 |
| Li | 7.165714000  | -0.200577000 | 0.223343000  |
| Li | -3.156644000 | -6.550236000 | 0.771660000  |
| H  | 2.000002000  | 7.653481000  | -2.701678000 |
| H  | 1.671967000  | 8.056603000  | -2.137347000 |
| H  | 4.578278000  | 6.328572000  | 0.374393000  |
| H  | 4.902069000  | 7.023039000  | 0.321816000  |
| H  | 2.357652000  | 8.462471000  | 0.416055000  |
| H  | 2.088337000  | 7.762865000  | 0.580714000  |
| H  | 4.391367000  | 6.128971000  | -2.570980000 |
| H  | 4.527158000  | 6.873389000  | -2.712324000 |
| H  | 4.090346000  | 9.170464000  | -1.641455000 |
| H  | 4.464442000  | 9.058236000  | -0.980033000 |

#### 4. Li<sup>+</sup>@PPA. Seven H<sub>2</sub> molecules inside the hollow and five H<sub>2</sub> molecules are on Li<sup>+</sup>

|   |             |              |              |
|---|-------------|--------------|--------------|
| O | 1.706891000 | 5.441561000  | 2.269031000  |
| O | 3.617487000 | 2.943318000  | -2.317874000 |
| O | 4.988080000 | -1.322610000 | 2.599895000  |
| O | 5.866014000 | 1.352649000  | -2.203000000 |
| O | 4.071545000 | -4.088424000 | 2.714836000  |
| O | 1.423388000 | -4.272081000 | -2.187161000 |
| C | 2.263376000 | 4.854255000  | 1.166598000  |
| C | 1.476855000 | 4.856766000  | -0.027516000 |
| C | 2.005213000 | 4.208981000  | -1.163616000 |
| H | 1.415034000 | 4.170536000  | -2.089510000 |
| C | 3.270022000 | 3.553554000  | -1.165838000 |
| C | 4.085047000 | 3.618331000  | 0.010864000  |
| C | 3.554518000 | 4.274025000  | 1.157729000  |
| H | 4.166044000 | 4.321493000  | 2.071524000  |

|   |              |              |              |
|---|--------------|--------------|--------------|
| C | 5.481920000  | 2.987984000  | 0.074376000  |
| H | 6.080702000  | 3.304281000  | −0.801965000 |
| H | 5.997469000  | 3.387990000  | 0.967299000  |
| C | 5.490142000  | 1.458451000  | 0.146932000  |
| C | 5.697633000  | 0.672928000  | −1.020875000 |
| C | 5.726413000  | −0.741588000 | −0.938261000 |
| H | 5.915586000  | −1.332262000 | −1.846824000 |
| C | 5.473259000  | −1.428698000 | 0.274113000  |
| C | 5.221936000  | −0.641633000 | 1.443512000  |
| C | 5.271370000  | 0.772655000  | 1.373239000  |
| H | 5.111987000  | 1.361840000  | 2.288719000  |
| C | 5.421630000  | −2.945236000 | 0.321621000  |
| H | 5.959801000  | −3.343410000 | −0.559709000 |
| H | 5.960346000  | −3.312271000 | 1.216760000  |
| C | 3.999419000  | −3.515003000 | 0.325714000  |
| C | 3.261016000  | −3.576071000 | −0.873254000 |
| H | 3.650952000  | −3.127400000 | −1.797688000 |
| C | 2.046922000  | −4.286129000 | −0.967576000 |
| C | 1.569328000  | −4.994641000 | 0.171852000  |
| C | 2.270698000  | −4.870466000 | 1.384312000  |
| H | 1.925602000  | −5.397176000 | 2.284609000  |
| C | 3.459058000  | −4.118079000 | 1.493537000  |
| C | 0.371324000  | −5.943146000 | 0.095277000  |
| H | 0.470861000  | −6.596794000 | −0.793114000 |
| H | 0.423217000  | −6.606743000 | 0.979920000  |
| H | 6.028545000  | 0.752367000  | −2.961630000 |
| H | 4.609256000  | −3.275443000 | 2.793361000  |
| H | 4.503457000  | 2.505016000  | −2.297343000 |
| H | 2.294478000  | 5.404916000  | 3.051680000  |
| H | 4.770939000  | −0.729997000 | 3.348576000  |
| H | 0.670832000  | −4.901086000 | −2.235234000 |
| O | −1.123088000 | −5.559853000 | −2.291139000 |
| O | −3.252916000 | −3.625091000 | 2.473613000  |
| O | −4.806293000 | 1.085516000  | −2.292219000 |
| O | −5.341496000 | −1.871024000 | 2.398231000  |
| O | −3.864205000 | 3.781911000  | −2.340330000 |
| O | −0.673036000 | 3.797083000  | 2.232192000  |
| C | −1.727421000 | −5.108034000 | −1.145240000 |
| C | −1.002283000 | −5.272430000 | 0.072381000  |
| C | −1.587841000 | −4.769228000 | 1.260963000  |
| H | −1.037669000 | −4.840749000 | 2.210264000  |
| C | −2.841596000 | −4.092649000 | 1.277932000  |
| C | −3.592226000 | −3.993485000 | 0.058639000  |
| C | −3.010398000 | −4.507161000 | −1.128019000 |
| H | −3.573510000 | −4.429401000 | −2.070818000 |
| C | −4.985210000 | −3.357449000 | 0.012560000  |
| H | −5.592368000 | −3.735821000 | 0.858373000  |
| H | −5.487539000 | −3.702805000 | −0.910185000 |
| C | −5.009415000 | −1.827823000 | 0.035023000  |



|    |              |              |              |
|----|--------------|--------------|--------------|
| C  | −5.197192000 | −1.118577000 | 1.245883000  |
| C  | −5.233379000 | 0.291740000  | 1.261139000  |
| H  | −5.327530000 | 0.819985000  | 2.223030000  |
| C  | −5.066283000 | 1.052353000  | 0.077443000  |
| C  | −4.906016000 | 0.334795000  | −1.140744000 |
| C  | −4.874672000 | −1.073785000 | −1.150903000 |
| H  | −4.748389000 | −1.600633000 | −2.109075000 |
| C  | −4.950550000 | 2.571950000  | 0.128848000  |
| H  | −5.359916000 | 2.921656000  | 1.097007000  |
| H  | −5.567145000 | 3.033406000  | −0.667596000 |
| C  | −3.530378000 | 3.132865000  | 0.000890000  |
| C  | −2.667256000 | 3.154201000  | 1.115081000  |
| H  | −2.953633000 | 2.662904000  | 2.055453000  |
| C  | −1.450413000 | 3.863675000  | 1.098062000  |
| C  | −1.094357000 | 4.609592000  | −0.059105000 |
| C  | −1.923955000 | 4.531957000  | −1.192709000 |
| H  | −1.675409000 | 5.088932000  | −2.106590000 |
| C  | −3.118323000 | 3.781173000  | −1.195037000 |
| C  | 0.115836000  | 5.544441000  | −0.078369000 |
| H  | 0.046783000  | 6.268311000  | 0.757355000  |
| H  | 0.063733000  | 6.138089000  | −1.010495000 |
| H  | −5.402416000 | −1.304974000 | 3.195351000  |
| H  | −4.346846000 | 2.930726000  | −2.408530000 |
| H  | −4.094874000 | −3.101600000 | 2.434817000  |
| H  | −1.673658000 | −5.403900000 | −3.085497000 |
| H  | −4.612991000 | 0.528910000  | −3.073611000 |
| H  | −0.065036000 | 4.563348000  | 2.306365000  |
| Li | −7.894206000 | 0.865505000  | 0.028323000  |
| Li | 3.505318000  | 5.874716000  | −0.566684000 |
| Li | 7.364483000  | −0.008044000 | 0.559053000  |
| Li | −2.790553000 | −6.650285000 | 0.634456000  |
| H  | 1.648734000  | 1.690884000  | 1.604669000  |
| H  | 1.065871000  | 2.124843000  | 1.857757000  |
| H  | −2.185499000 | −0.521777000 | 2.029231000  |
| H  | −2.284173000 | −1.188879000 | 2.392991000  |
| H  | −0.092116000 | 2.202752000  | −3.314745000 |
| H  | −0.595428000 | 2.557741000  | −2.857337000 |
| H  | −0.292404000 | −2.536241000 | −2.122115000 |
| H  | −0.882215000 | −2.074911000 | −1.948387000 |
| H  | −1.631812000 | 0.175168000  | −0.822206000 |
| H  | −1.885512000 | 0.864121000  | −0.599070000 |
| H  | 1.414084000  | −1.797562000 | 0.542270000  |
| H  | 1.157998000  | −1.356895000 | 1.116388000  |
| H  | 2.726388000  | 0.495635000  | −1.769552000 |
| H  | 2.618835000  | −0.130158000 | −1.339931000 |
| H  | −8.008481000 | −0.204629000 | 1.862862000  |
| H  | −8.730382000 | 0.045812000  | 1.935620000  |
| H  | −7.737676000 | 2.612090000  | 1.131651000  |
| H  | −8.414399000 | 2.777197000  | 0.810520000  |

|                                                                                                                                  |               |              |              |
|----------------------------------------------------------------------------------------------------------------------------------|---------------|--------------|--------------|
| H                                                                                                                                | -7.322629000  | 1.601669000  | -1.873083000 |
| H                                                                                                                                | -8.005728000  | 1.946572000  | -1.814983000 |
| H                                                                                                                                | -8.342711000  | -0.995194000 | -0.851333000 |
| H                                                                                                                                | -7.576239000  | -1.011782000 | -0.803589000 |
| H                                                                                                                                | -9.976688000  | 0.955954000  | -0.677921000 |
| H                                                                                                                                | -10.099476000 | 0.964818000  | 0.080424000  |
| <b>Li<sup>+</sup>@PPA. Seven H<sub>2</sub> molecules inside the hollow and ten H<sub>2</sub> molecules are on Li<sup>+</sup></b> |               |              |              |
| O                                                                                                                                | 1.684963000   | 5.517186000  | 2.263939000  |
| O                                                                                                                                | 3.577699000   | 3.054766000  | -2.350870000 |
| O                                                                                                                                | 4.954001000   | -1.280380000 | 2.491061000  |
| O                                                                                                                                | 5.830783000   | 1.474294000  | -2.266185000 |
| O                                                                                                                                | 3.968750000   | -4.030990000 | 2.520553000  |
| O                                                                                                                                | 1.505545000   | -4.150325000 | -2.477766000 |
| C                                                                                                                                | 2.233012000   | 4.932352000  | 1.155679000  |
| C                                                                                                                                | 1.438730000   | 4.937088000  | -0.033132000 |
| C                                                                                                                                | 1.964326000   | 4.301240000  | -1.177179000 |
| H                                                                                                                                | 1.372740000   | 4.273223000  | -2.102621000 |
| C                                                                                                                                | 3.231218000   | 3.650118000  | -1.191162000 |
| C                                                                                                                                | 4.049726000   | 3.704524000  | -0.016226000 |
| C                                                                                                                                | 3.524153000   | 4.352455000  | 1.137043000  |
| H                                                                                                                                | 4.139622000   | 4.393740000  | 2.048460000  |
| C                                                                                                                                | 5.445586000   | 3.071688000  | 0.037690000  |
| H                                                                                                                                | 6.045105000   | 3.401534000  | -0.833200000 |
| H                                                                                                                                | 5.961122000   | 3.457121000  | 0.937059000  |
| C                                                                                                                                | 5.453186000   | 1.541101000  | 0.085282000  |
| C                                                                                                                                | 5.664135000   | 0.775313000  | -1.094728000 |
| C                                                                                                                                | 5.702237000   | -0.639899000 | -1.034392000 |
| H                                                                                                                                | 5.896112000   | -1.215498000 | -1.951421000 |
| C                                                                                                                                | 5.453320000   | -1.347212000 | 0.167397000  |
| C                                                                                                                                | 5.190971000   | -0.580405000 | 1.347183000  |
| C                                                                                                                                | 5.233867000   | 0.834751000  | 1.299951000  |
| H                                                                                                                                | 5.069829000   | 1.408585000  | 2.224278000  |
| C                                                                                                                                | 5.407669000   | -2.864386000 | 0.189347000  |
| H                                                                                                                                | 5.975066000   | -3.246830000 | -0.680633000 |
| H                                                                                                                                | 5.917218000   | -3.243831000 | 1.095895000  |
| C                                                                                                                                | 3.986324000   | -3.433303000 | 0.134908000  |
| C                                                                                                                                | 3.290918000   | -3.477378000 | -1.090208000 |
| H                                                                                                                                | 3.712895000   | -3.016477000 | -1.994594000 |
| C                                                                                                                                | 2.077767000   | -4.180663000 | -1.238706000 |
| C                                                                                                                                | 1.560073000   | -4.907068000 | -0.126776000 |
| C                                                                                                                                | 2.216078000   | -4.794271000 | 1.112356000  |
| H                                                                                                                                | 1.839316000   | -5.331457000 | 1.993772000  |
| C                                                                                                                                | 3.400761000   | -4.046106000 | 1.275997000  |
| C                                                                                                                                | 0.378958000   | -5.872318000 | -0.262420000 |
| H                                                                                                                                | 0.490422000   | -6.454233000 | -1.198134000 |
| H                                                                                                                                | 0.459928000   | -6.600802000 | 0.566306000  |
| H                                                                                                                                | 5.985833000   | 0.884855000  | -3.034811000 |
| H                                                                                                                                | 4.509654000   | -3.222919000 | 2.624881000  |
| H                                                                                                                                | 4.466184000   | 2.620566000  | -2.339242000 |

|    |              |              |              |
|----|--------------|--------------|--------------|
| H  | 2.276730000  | 5.472825000  | 3.043041000  |
| H  | 4.712226000  | −0.700917000 | 3.242283000  |
| H  | 0.680268000  | −4.684522000 | −2.531211000 |
| O  | −1.074955000 | −5.233443000 | −2.606091000 |
| O  | −3.425844000 | −4.084648000 | 2.305491000  |
| O  | −5.028416000 | 1.159869000  | −2.294358000 |
| O  | −5.140979000 | −1.972460000 | 2.315074000  |
| O  | −3.914957000 | 3.778733000  | −2.275798000 |
| O  | −0.684111000 | 3.880519000  | 2.268102000  |
| C  | −1.703061000 | −4.916626000 | −1.420817000 |
| C  | −1.012180000 | −5.244570000 | −0.226637000 |
| C  | −1.649968000 | −4.938789000 | 0.998921000  |
| H  | −1.110974000 | −5.088824000 | 1.947427000  |
| C  | −2.916885000 | −4.299217000 | 1.058298000  |
| C  | −3.605221000 | −3.987014000 | −0.149797000 |
| C  | −2.969180000 | −4.301892000 | −1.370643000 |
| H  | −3.488534000 | −4.077430000 | −2.314660000 |
| C  | −5.004389000 | −3.364665000 | −0.154256000 |
| H  | −5.599560000 | −3.787923000 | 0.678599000  |
| H  | −5.512734000 | −3.670167000 | −1.087733000 |
| C  | −5.035206000 | −1.839747000 | −0.065848000 |
| C  | −5.089338000 | −1.177632000 | 1.185809000  |
| C  | −5.101957000 | 0.227751000  | 1.259537000  |
| H  | −5.111496000 | 0.718531000  | 2.244996000  |
| C  | −5.057530000 | 1.032520000  | 0.096480000  |
| C  | −5.025318000 | 0.365552000  | −1.155467000 |
| C  | −5.015722000 | −1.040947000 | −1.227437000 |
| H  | −4.996268000 | −1.530750000 | −2.212971000 |
| C  | −4.945988000 | 2.551625000  | 0.199721000  |
| H  | −5.344233000 | 2.865780000  | 1.184551000  |
| H  | −5.568632000 | 3.036242000  | −0.581304000 |
| C  | −3.537606000 | 3.140120000  | 0.060238000  |
| C  | −2.668520000 | 3.187080000  | 1.167765000  |
| H  | −2.938869000 | 2.700293000  | 2.114861000  |
| C  | −1.465430000 | 3.919584000  | 1.136044000  |
| C  | −1.127731000 | 4.658333000  | −0.030990000 |
| C  | −1.963540000 | 4.554234000  | −1.158804000 |
| H  | −1.728608000 | 5.103275000  | −2.081123000 |
| C  | −3.146476000 | 3.786227000  | −1.143575000 |
| C  | 0.069502000  | 5.609791000  | −0.069146000 |
| H  | 0.002324000  | 6.335650000  | 0.765016000  |
| H  | −0.001883000 | 6.198817000  | −1.002756000 |
| H  | −5.138870000 | −1.435110000 | 3.133138000  |
| H  | −4.377896000 | 2.915574000  | −2.347679000 |
| H  | −4.154728000 | −3.411088000 | 2.307118000  |
| H  | −1.620469000 | −4.991563000 | −3.381283000 |
| H  | −4.885244000 | 0.623865000  | −3.101012000 |
| H  | −0.081596000 | 4.652492000  | 2.326652000  |
| Li | −7.920098000 | 1.536536000  | −0.268981000 |

|                                                                                                                                      |               |              |              |
|--------------------------------------------------------------------------------------------------------------------------------------|---------------|--------------|--------------|
| Li                                                                                                                                   | 3.463422000   | 5.961908000  | −0.572071000 |
| Li                                                                                                                                   | 7.326477000   | 0.075448000  | 0.474712000  |
| Li                                                                                                                                   | −2.641226000  | −7.218112000 | 1.229664000  |
| H                                                                                                                                    | 1.679729000   | 1.817301000  | 1.806084000  |
| H                                                                                                                                    | 1.082743000   | 2.251695000  | 2.024078000  |
| H                                                                                                                                    | −2.095609000  | −1.066239000 | 3.079709000  |
| H                                                                                                                                    | −2.374615000  | −1.778557000 | 3.129734000  |
| H                                                                                                                                    | 0.149279000   | 1.526935000  | −1.381456000 |
| H                                                                                                                                    | −0.349528000  | 2.096189000  | −1.259616000 |
| H                                                                                                                                    | −0.160671000  | −2.313908000 | −2.287816000 |
| H                                                                                                                                    | −0.697995000  | −1.843262000 | −2.005296000 |
| H                                                                                                                                    | −2.161015000  | −0.533430000 | 0.024760000  |
| H                                                                                                                                    | −2.082091000  | 0.229522000  | 0.032383000  |
| H                                                                                                                                    | 2.224658000   | −1.339357000 | 0.900728000  |
| H                                                                                                                                    | 1.973841000   | −0.642810000 | 1.104512000  |
| H                                                                                                                                    | 2.761591000   | 0.521576000  | −2.134575000 |
| H                                                                                                                                    | 2.686221000   | −0.177763000 | −1.829278000 |
| H                                                                                                                                    | −7.792161000  | 1.128291000  | 1.765562000  |
| H                                                                                                                                    | −8.396706000  | 1.599682000  | 1.812162000  |
| H                                                                                                                                    | −7.721736000  | 3.634546000  | −0.010807000 |
| H                                                                                                                                    | −8.477708000  | 3.621244000  | −0.143783000 |
| H                                                                                                                                    | −7.323358000  | 1.702331000  | −2.287311000 |
| H                                                                                                                                    | −8.069602000  | 1.885775000  | −2.312007000 |
| H                                                                                                                                    | −8.371978000  | −0.530010000 | −0.290708000 |
| H                                                                                                                                    | −7.643056000  | −0.517166000 | −0.532543000 |
| H                                                                                                                                    | −10.019945000 | 1.381021000  | −0.841014000 |
| H                                                                                                                                    | −10.103071000 | 1.662622000  | −0.131348000 |
| H                                                                                                                                    | −4.204002000  | −6.608015000 | −0.009660000 |
| H                                                                                                                                    | −4.482913000  | −7.295184000 | 0.189335000  |
| H                                                                                                                                    | −1.791771000  | −8.566264000 | −0.292524000 |
| H                                                                                                                                    | −1.778989000  | −7.871051000 | −0.615922000 |
| H                                                                                                                                    | −1.008490000  | −7.634643000 | 2.540674000  |
| H                                                                                                                                    | −1.110980000  | −8.354405000 | 2.296512000  |
| H                                                                                                                                    | −3.606185000  | −6.313586000 | 2.916770000  |
| H                                                                                                                                    | −3.627737000  | −7.066757000 | 3.070649000  |
| H                                                                                                                                    | −3.480707000  | −9.419983000 | 1.256534000  |
| H                                                                                                                                    | −3.633929000  | −9.216342000 | 1.981764000  |
| <b>Li<sup>+</sup>@PPA. Seven H<sub>2</sub> molecules inside the hollow and fifteen H<sub>2</sub> molecules are on Li<sup>+</sup></b> |               |              |              |
| O                                                                                                                                    | 1.431972000   | 5.224922000  | 2.583553000  |
| O                                                                                                                                    | 3.704683000   | 3.564082000  | −2.216910000 |
| O                                                                                                                                    | 5.030564000   | −1.329321000 | 2.585125000  |
| O                                                                                                                                    | 5.621299000   | 1.610335000  | −2.115047000 |
| O                                                                                                                                    | 3.847733000   | −3.947589000 | 2.527165000  |
| O                                                                                                                                    | 1.451761000   | −4.259444000 | −2.497712000 |
| C                                                                                                                                    | 2.042159000   | 4.786487000  | 1.429021000  |
| C                                                                                                                                    | 1.335020000   | 4.992522000  | 0.216388000  |
| C                                                                                                                                    | 1.956675000   | 4.562192000  | −0.979538000 |
| H                                                                                                                                    | 1.403179000   | 4.610158000  | −1.930279000 |
| C                                                                                                                                    | 3.220859000   | 3.913929000  | −0.990731000 |

|   |              |              |              |
|---|--------------|--------------|--------------|
| C | 3.924953000  | 3.725867000  | 0.233068000  |
| C | 3.306161000  | 4.165642000  | 1.423969000  |
| H | 3.838280000  | 4.039209000  | 2.379184000  |
| C | 5.325288000  | 3.107000000  | 0.283244000  |
| H | 5.930430000  | 3.496635000  | −0.558950000 |
| H | 5.817670000  | 3.455715000  | 1.210212000  |
| C | 5.361339000  | 1.579219000  | 0.260663000  |
| C | 5.500889000  | 0.865109000  | −0.956934000 |
| C | 5.525272000  | −0.548791000 | −0.966902000 |
| H | 5.626628000  | −1.083829000 | −1.923489000 |
| C | 5.360721000  | −1.306232000 | 0.221705000  |
| C | 5.200436000  | −0.586413000 | 1.442801000  |
| C | 5.229568000  | 0.826687000  | 1.451706000  |
| H | 5.113263000  | 1.360312000  | 2.407562000  |
| C | 5.294139000  | −2.825683000 | 0.181944000  |
| H | 5.842602000  | −3.175393000 | −0.714331000 |
| H | 5.816270000  | −3.245566000 | 1.063838000  |
| C | 3.881114000  | −3.414180000 | 0.128261000  |
| C | 3.203797000  | −3.508473000 | −1.103066000 |
| H | 3.631304000  | −3.066110000 | −2.013986000 |
| C | 2.004538000  | −4.236670000 | −1.246732000 |
| C | 1.485019000  | −4.938594000 | −0.122031000 |
| C | 2.121557000  | −4.777660000 | 1.122404000  |
| H | 1.741396000  | −5.295871000 | 2.013698000  |
| C | 3.290819000  | −4.005096000 | 1.278510000  |
| C | 0.313921000  | −5.917190000 | −0.244239000 |
| H | 0.420557000  | −6.502803000 | −1.178003000 |
| H | 0.404708000  | −6.640370000 | 0.588199000  |
| H | 5.612209000  | 1.036698000  | −2.909162000 |
| H | 4.378755000  | −3.128286000 | 2.613813000  |
| H | 4.484400000  | 2.953872000  | −2.167097000 |
| H | 1.979360000  | 5.043140000  | 3.373752000  |
| H | 4.837465000  | −0.764449000 | 3.360268000  |
| H | 0.621311000  | −4.785802000 | −2.533502000 |
| O | −1.156721000 | −5.273307000 | −2.579408000 |
| O | −3.465347000 | −4.110027000 | 2.348511000  |
| O | −5.145454000 | 1.100650000  | −2.338417000 |
| O | −5.120232000 | −1.921782000 | 2.345459000  |
| O | −3.727061000 | 3.579101000  | −2.324004000 |
| O | −1.130048000 | 4.088994000  | 2.584612000  |
| C | −1.767868000 | −4.944443000 | −1.388439000 |
| C | −1.076135000 | −5.289099000 | −0.199179000 |
| C | −1.704553000 | −4.982411000 | 1.030636000  |
| H | −1.159705000 | −5.137578000 | 1.974902000  |
| C | −2.960150000 | −4.321814000 | 1.100495000  |
| C | −3.649468000 | −3.994531000 | −0.102929000 |
| C | −3.023378000 | −4.309378000 | −1.328775000 |
| H | −3.545163000 | −4.075374000 | −2.269142000 |
| C | −5.047204000 | −3.370803000 | −0.092961000 |

|    |              |              |              |
|----|--------------|--------------|--------------|
| H  | -5.620278000 | -3.774733000 | 0.764407000  |
| H  | -5.575640000 | -3.698831000 | -1.007545000 |
| C  | -5.084588000 | -1.844806000 | -0.040071000 |
| C  | -5.121470000 | -1.152937000 | 1.196849000  |
| C  | -5.172297000 | 0.253032000  | 1.236522000  |
| H  | -5.172364000 | 0.768117000  | 2.209647000  |
| C  | -5.166343000 | 1.030955000  | 0.053077000  |
| C  | -5.128611000 | 0.333566000  | -1.182383000 |
| C  | -5.097777000 | -1.074369000 | -1.220243000 |
| H  | -5.086750000 | -1.587269000 | -2.194166000 |
| C  | -5.075326000 | 2.554647000  | 0.116686000  |
| H  | -5.558974000 | 2.898337000  | 1.053452000  |
| H  | -5.628283000 | 3.005678000  | -0.732894000 |
| C  | -3.659879000 | 3.142097000  | 0.094171000  |
| C  | -2.936753000 | 3.288695000  | 1.293035000  |
| H  | -3.333186000 | 2.892080000  | 2.237928000  |
| C  | -1.726218000 | 4.010580000  | 1.356796000  |
| C  | -1.237761000 | 4.644528000  | 0.179378000  |
| C  | -1.926127000 | 4.433058000  | -1.031080000 |
| H  | -1.574574000 | 4.903584000  | -1.959729000 |
| C  | -3.112117000 | 3.673807000  | -1.104505000 |
| C  | -0.057140000 | 5.619514000  | 0.206811000  |
| H  | -0.156664000 | 6.291945000  | 1.081348000  |
| H  | -0.149244000 | 6.260957000  | -0.690222000 |
| H  | -5.145615000 | -1.366325000 | 3.150778000  |
| H  | -4.269642000 | 2.762365000  | -2.368588000 |
| H  | -4.145550000 | -3.389194000 | 2.360555000  |
| H  | -1.690513000 | -4.988285000 | -3.347827000 |
| H  | -5.016787000 | 0.545021000  | -3.134209000 |
| H  | -0.315666000 | 4.641085000  | 2.577467000  |
| Li | -7.983531000 | 1.386822000  | -0.198185000 |
| Li | 2.877265000  | 6.792774000  | -1.432414000 |
| Li | 8.190836000  | -0.376345000 | 0.482185000  |
| Li | -2.695575000 | -7.229685000 | 1.237776000  |
| H  | 1.167930000  | 1.831247000  | 2.532293000  |
| H  | 0.580941000  | 2.296799000  | 2.703075000  |
| H  | -0.086088000 | -2.325391000 | 0.164556000  |
| H  | -0.355541000 | -2.074710000 | 0.836248000  |
| H  | 0.478382000  | 1.584519000  | -0.938965000 |
| H  | -0.038176000 | 2.133288000  | -0.797393000 |
| H  | -0.260753000 | -2.473188000 | -2.718829000 |
| H  | -0.840170000 | -1.973910000 | -2.650941000 |
| H  | -2.193181000 | -0.344204000 | -0.062513000 |
| H  | -2.244013000 | 0.416413000  | 0.025179000  |
| H  | 2.338813000  | -0.763717000 | 0.317627000  |
| H  | 2.308683000  | 0.000048000  | 0.386229000  |
| H  | 2.839918000  | 1.039445000  | -2.700807000 |
| H  | 2.744121000  | 0.298221000  | -2.529638000 |
| H  | -7.870576000 | 0.985728000  | 1.842389000  |

|                                                                                                                                     |               |              |              |
|-------------------------------------------------------------------------------------------------------------------------------------|---------------|--------------|--------------|
| H                                                                                                                                   | -8.488542000  | 1.439566000  | 1.886649000  |
| H                                                                                                                                   | -7.835060000  | 3.492164000  | 0.067951000  |
| H                                                                                                                                   | -8.591060000  | 3.452615000  | -0.058162000 |
| H                                                                                                                                   | -7.443920000  | 1.588259000  | -2.243803000 |
| H                                                                                                                                   | -8.202078000  | 1.716289000  | -2.247541000 |
| H                                                                                                                                   | -8.453500000  | -0.676807000 | -0.251020000 |
| H                                                                                                                                   | -7.711155000  | -0.671658000 | -0.448149000 |
| H                                                                                                                                   | -10.103413000 | 1.289006000  | -0.777140000 |
| H                                                                                                                                   | -10.181924000 | 1.425754000  | -0.025620000 |
| H                                                                                                                                   | -4.252197000  | -6.616085000 | -0.001337000 |
| H                                                                                                                                   | -4.529682000  | -7.309592000 | 0.176139000  |
| H                                                                                                                                   | -1.847368000  | -8.601019000 | -0.278719000 |
| H                                                                                                                                   | -1.831043000  | -7.908284000 | -0.607015000 |
| H                                                                                                                                   | -1.072541000  | -7.666572000 | 2.551689000  |
| H                                                                                                                                   | -1.175921000  | -8.384713000 | 2.303252000  |
| H                                                                                                                                   | -3.680105000  | -6.334098000 | 2.925477000  |
| H                                                                                                                                   | -3.693369000  | -7.088136000 | 3.076181000  |
| H                                                                                                                                   | -3.547800000  | -9.442382000 | 1.257614000  |
| H                                                                                                                                   | -3.709863000  | -9.234693000 | 1.979673000  |
| H                                                                                                                                   | 1.485214000   | 7.794210000  | -2.773061000 |
| H                                                                                                                                   | 1.201553000   | 7.085686000  | -2.697230000 |
| H                                                                                                                                   | 1.967071000   | 8.375644000  | -0.185989000 |
| H                                                                                                                                   | 2.042639000   | 7.772267000  | 0.280737000  |
| H                                                                                                                                   | 4.013428000   | 8.679222000  | -2.409044000 |
| H                                                                                                                                   | 3.763247000   | 9.012468000  | -1.762973000 |
| H                                                                                                                                   | 3.935538000   | 6.461976000  | -3.221089000 |
| H                                                                                                                                   | 3.893965000   | 5.723001000  | -3.011697000 |
| H                                                                                                                                   | 4.426759000   | 6.337580000  | -0.104638000 |
| H                                                                                                                                   | 4.644312000   | 7.046966000  | -0.301818000 |
| <b>Li<sup>+</sup>@PPA. Seven H<sub>2</sub> molecules inside the hollow and twenty H<sub>2</sub> molecules are on Li<sup>+</sup></b> |               |              |              |
| O                                                                                                                                   | 1.381978000   | 5.241987000  | 2.575198000  |
| O                                                                                                                                   | 3.692431000   | 3.541637000  | -2.193840000 |
| O                                                                                                                                   | 5.148345000   | -1.364955000 | 2.580617000  |
| O                                                                                                                                   | 5.659213000   | 1.649489000  | -2.078515000 |
| O                                                                                                                                   | 3.927712000   | -3.953056000 | 2.484602000  |
| O                                                                                                                                   | 1.455856000   | -4.215362000 | -2.506819000 |
| C                                                                                                                                   | 1.999211000   | 4.791575000  | 1.428043000  |
| C                                                                                                                                   | 1.301854000   | 4.987824000  | 0.208745000  |
| C                                                                                                                                   | 1.933192000   | 4.547424000  | -0.978828000 |
| H                                                                                                                                   | 1.386886000   | 4.588879000  | -1.934130000 |
| C                                                                                                                                   | 3.197711000   | 3.899014000  | -0.974689000 |
| C                                                                                                                                   | 3.890710000   | 3.718914000  | 0.257189000  |
| C                                                                                                                                   | 3.262102000   | 4.168846000  | 1.438618000  |
| H                                                                                                                                   | 3.786698000   | 4.049364000  | 2.398852000  |
| C                                                                                                                                   | 5.290139000   | 3.102265000  | 0.325579000  |
| H                                                                                                                                   | 5.910644000   | 3.502763000  | -0.500154000 |
| H                                                                                                                                   | 5.765430000   | 3.441413000  | 1.264682000  |
| C                                                                                                                                   | 5.338432000   | 1.575585000  | 0.285255000  |
| C                                                                                                                                   | 5.526509000   | 0.881867000  | -0.935579000 |

|   |              |              |              |
|---|--------------|--------------|--------------|
| C | 5.583082000  | −0.525118000 | −0.966819000 |
| H | 5.697470000  | −1.041949000 | −1.931997000 |
| C | 5.434712000  | −1.301338000 | 0.208957000  |
| C | 5.257317000  | −0.600240000 | 1.432196000  |
| C | 5.215245000  | 0.807648000  | 1.461986000  |
| H | 5.081156000  | 1.322622000  | 2.425456000  |
| C | 5.340256000  | −2.823349000 | 0.135771000  |
| H | 5.862839000  | −3.161153000 | −0.781496000 |
| H | 5.856802000  | −3.283475000 | 1.002918000  |
| C | 3.921195000  | −3.398915000 | 0.092032000  |
| C | 3.228368000  | −3.480780000 | −1.131030000 |
| H | 3.646331000  | −3.033661000 | −2.043936000 |
| C | 2.023023000  | −4.202257000 | −1.263058000 |
| C | 1.512726000  | −4.907151000 | −0.135724000 |
| C | 2.166664000  | −4.756904000 | 1.101560000  |
| H | 1.794361000  | −5.277680000 | 1.994673000  |
| C | 3.343297000  | −3.994337000 | 1.245563000  |
| C | 0.337436000  | −5.882478000 | −0.248938000 |
| H | 0.439808000  | −6.470695000 | −1.181700000 |
| H | 0.431418000  | −6.603859000 | 0.584747000  |
| H | 5.724976000  | 1.089794000  | −2.879195000 |
| H | 4.422902000  | −3.112208000 | 2.585388000  |
| H | 4.484399000  | 2.946217000  | −2.136074000 |
| H | 1.925736000  | 5.066663000  | 3.369355000  |
| H | 4.938121000  | −0.810150000 | 3.359232000  |
| H | 0.624145000  | −4.740421000 | −2.538036000 |
| O | −1.141998000 | −5.242604000 | −2.579630000 |
| O | −3.441768000 | −4.086932000 | 2.354286000  |
| O | −5.188030000 | 1.097597000  | −2.340934000 |
| O | −5.111515000 | −1.911068000 | 2.351342000  |
| O | −3.763284000 | 3.573795000  | −2.336916000 |
| O | −1.171167000 | 4.105306000  | 2.572156000  |
| C | −1.750920000 | −4.916085000 | −1.386491000 |
| C | −1.053413000 | −5.256213000 | −0.199545000 |
| C | −1.679561000 | −4.950624000 | 1.031949000  |
| H | −1.132218000 | −5.105215000 | 1.974877000  |
| C | −2.938715000 | −4.297356000 | 1.105236000  |
| C | −3.634588000 | −3.976937000 | −0.096590000 |
| C | −3.010211000 | −4.288892000 | −1.323837000 |
| H | −3.536586000 | −4.059431000 | −2.262744000 |
| C | −5.037893000 | −3.365883000 | −0.083045000 |
| H | −5.603891000 | −3.772746000 | 0.777618000  |
| H | −5.566367000 | −3.701708000 | −0.994744000 |
| C | −5.089662000 | −1.840373000 | −0.034495000 |
| C | −5.126346000 | −1.145198000 | 1.200428000  |
| C | −5.188853000 | 0.260282000  | 1.236617000  |
| H | −5.186402000 | 0.778211000  | 2.208218000  |
| C | −5.195660000 | 1.034405000  | 0.050738000  |
| C | −5.158946000 | 0.333783000  | −1.182943000 |



|    |               |              |              |
|----|---------------|--------------|--------------|
| C  | -5.115751000  | -1.073749000 | -1.216948000 |
| H  | -5.104715000  | -1.589490000 | -2.189361000 |
| C  | -5.112368000  | 2.558650000  | 0.108910000  |
| H  | -5.596458000  | 2.904269000  | 1.044819000  |
| H  | -5.667029000  | 3.004249000  | -0.742405000 |
| C  | -3.698291000  | 3.148814000  | 0.083857000  |
| C  | -2.976139000  | 3.301047000  | 1.282431000  |
| H  | -3.373614000  | 2.910529000  | 2.229425000  |
| C  | -1.764330000  | 4.021027000  | 1.343728000  |
| C  | -1.272385000  | 4.645746000  | 0.162632000  |
| C  | -1.960839000  | 4.429260000  | -1.046822000 |
| H  | -1.606751000  | 4.893308000  | -1.977763000 |
| C  | -3.149059000  | 3.673275000  | -1.117183000 |
| C  | -0.088783000  | 5.617416000  | 0.184090000  |
| H  | -0.191093000  | 6.300863000  | 1.049837000  |
| H  | -0.175506000  | 6.247364000  | -0.721589000 |
| H  | -5.138917000  | -1.353342000 | 3.155041000  |
| H  | -4.309158000  | 2.759282000  | -2.377490000 |
| H  | -4.125345000  | -3.368901000 | 2.367315000  |
| H  | -1.680256000  | -4.960958000 | -3.346233000 |
| H  | -5.057949000  | 0.540861000  | -3.135727000 |
| H  | -0.355575000  | 4.656268000  | 2.564861000  |
| Li | -8.012538000  | 1.394871000  | -0.193737000 |
| Li | 2.880243000   | 6.756313000  | -1.425947000 |
| Li | 8.216438000   | -1.374458000 | 0.610582000  |
| Li | -2.672801000  | -7.199166000 | 1.246038000  |
| H  | 1.117352000   | 1.838061000  | 2.535052000  |
| H  | 0.531316000   | 2.304119000  | 2.707672000  |
| H  | -0.076254000  | -2.302571000 | 0.164682000  |
| H  | -0.342736000  | -2.056933000 | 0.839286000  |
| H  | 0.470600000   | 1.572762000  | -0.947982000 |
| H  | -0.051739000  | 2.118660000  | -0.817162000 |
| H  | -0.279512000  | -2.425536000 | -2.711792000 |
| H  | -0.860526000  | -1.928786000 | -2.640667000 |
| H  | -2.214951000  | -0.329363000 | -0.069336000 |
| H  | -2.267681000  | 0.432084000  | 0.010077000  |
| H  | 2.361471000   | -0.751780000 | 0.322023000  |
| H  | 2.325128000   | 0.010312000  | 0.402454000  |
| H  | 2.863519000   | 1.028852000  | -2.699158000 |
| H  | 2.775326000   | 0.285282000  | -2.534424000 |
| H  | -7.888368000  | 0.997379000  | 1.845162000  |
| H  | -8.509865000  | 1.446190000  | 1.891047000  |
| H  | -7.867496000  | 3.497978000  | 0.068193000  |
| H  | -8.623965000  | 3.459211000  | -0.055266000 |
| H  | -7.481804000  | 1.588209000  | -2.239900000 |
| H  | -8.239929000  | 1.716690000  | -2.241102000 |
| H  | -8.473632000  | -0.675587000 | -0.239800000 |
| H  | -7.732385000  | -0.666677000 | -0.440990000 |
| H  | -10.136793000 | 1.292644000  | -0.763464000 |

|   |               |              |              |
|---|---------------|--------------|--------------|
| H | -10.212168000 | 1.432937000  | -0.012308000 |
| H | -4.230962000  | -6.590716000 | 0.008754000  |
| H | -4.507827000  | -7.284150000 | 0.187526000  |
| H | -1.824480000  | -8.569120000 | -0.270533000 |
| H | -1.808401000  | -7.877478000 | -0.601145000 |
| H | -1.046731000  | -7.630358000 | 2.557399000  |
| H | -1.151198000  | -8.348698000 | 2.309994000  |
| H | -3.656163000  | -6.306463000 | 2.934988000  |
| H | -3.667867000  | -7.060502000 | 3.086078000  |
| H | -3.518340000  | -9.413026000 | 1.272797000  |
| H | -3.679302000  | -9.204219000 | 1.994771000  |
| H | 1.495445000   | 7.766195000  | -2.786059000 |
| H | 1.209676000   | 7.058681000  | -2.708865000 |
| H | 1.957337000   | 8.348810000  | -0.210225000 |
| H | 2.038743000   | 7.754411000  | 0.266900000  |
| H | 4.030749000   | 8.650961000  | -2.411233000 |
| H | 3.774485000   | 8.988337000  | -1.769645000 |
| H | 3.942447000   | 6.430296000  | -3.207359000 |
| H | 3.898777000   | 5.690033000  | -3.002661000 |
| H | 4.420530000   | 6.310423000  | -0.098243000 |
| H | 4.640193000   | 7.020480000  | -0.290696000 |
| H | 9.085524000   | -0.997338000 | -1.325523000 |
| H | 8.414416000   | -0.625369000 | -1.333472000 |
| H | 10.447211000  | -1.143213000 | 0.822706000  |
| H | 10.325162000  | -1.680009000 | 1.358923000  |
| H | 8.119509000   | -3.407679000 | 0.082429000  |
| H | 8.875064000   | -3.315785000 | -0.009645000 |
| H | 8.664761000   | 0.582524000  | 1.188451000  |
| H | 7.901097000   | 0.640149000  | 1.130381000  |
| H | 7.493795000   | -1.894617000 | 2.538007000  |
| H | 8.237566000   | -2.078929000 | 2.588557000  |
